# Supplementary material for: Earth Abundant Oxidation Catalysts for Removal of Contaminants of Emerging Concern from Wastewater: Homogeneous Catalytic Screening of Monomeric Complexes
Source: MDPI journal article supplement (doi:10.3390/molecules28186466), 2023-09-06
Supplement: s1 [file s1]

# Earth abundant oxidation catalysts for removal of contaminants of emerging concern from wastewater: homogeneous catalytic screening of monomeric complexes designed for eventual co-polymerization to form recyclable heterogeneous catalysts

Leslie Garcia<sup>1</sup>, Makynna R. Koper<sup>1</sup>, Somrita Mondal<sup>1</sup>, Joshua T. Priddle<sup>1</sup>, William A. Truong<sup>1</sup>, Elisabeth M. A. Allbritton<sup>1</sup>, Ashtyn G. McAdoo<sup>1</sup>, Desiray J. Cannon-Smith<sup>1</sup>, Neil L. Funwie<sup>1</sup>, Tuyet Hoang<sup>1</sup>, Inseo Kim<sup>1</sup>, David J. Hubin<sup>1</sup>, Jeanette A. Krause<sup>2</sup>, Allen G. Oliver<sup>3</sup>, Timothy J. Prior<sup>4</sup>, and Timothy J. Hubin<sup>1,\*</sup>

## Supplementary Information

| <b>Table of Contents</b>                                                                                   | <b>Page</b> |
|------------------------------------------------------------------------------------------------------------|-------------|
| 1. Figures S1-S12. <sup>1</sup> H and <sup>13</sup> C NMR Spectra for novel organic compounds.             | 2           |
| 2. Figure S13. Example of Kinetic Decomplexation Plot to Determine t <sub>1/2</sub> for Copper Complexes.  | 14          |
| 3. Figures S14-S21. Cyclic Voltammograms for novel Mn and Fe complexes                                     | 15          |
| 4. Figures S22-S33. Dye Bleaching Plots of catalyst, H <sub>2</sub> O <sub>2</sub> , and dye (MB, MO, RhB) | 23          |
| 5. Tables S1-S52. Crystallographic Details for all new structures.                                         | 29          |

Figure S1. a)  $^1\text{H}$  NMR (a) and  $^{13}\text{C}$  NMR (b) spectra for **3**.

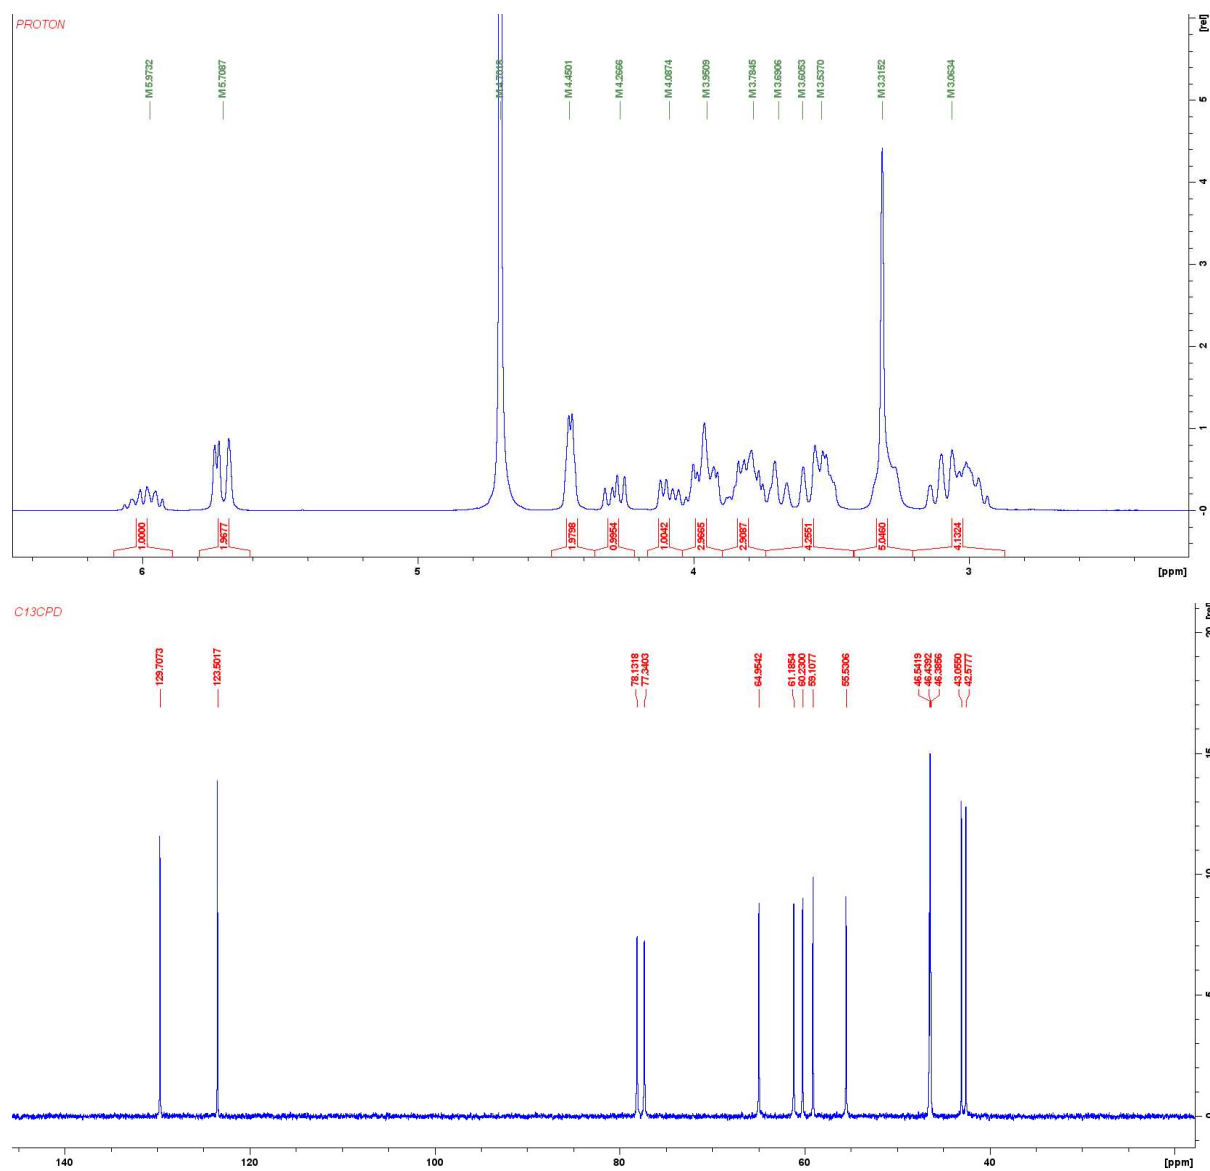

Figure S2. a)  $^1\text{H}$  NMR (a) and  $^{13}\text{C}$  NMR (b) spectra for **4**.

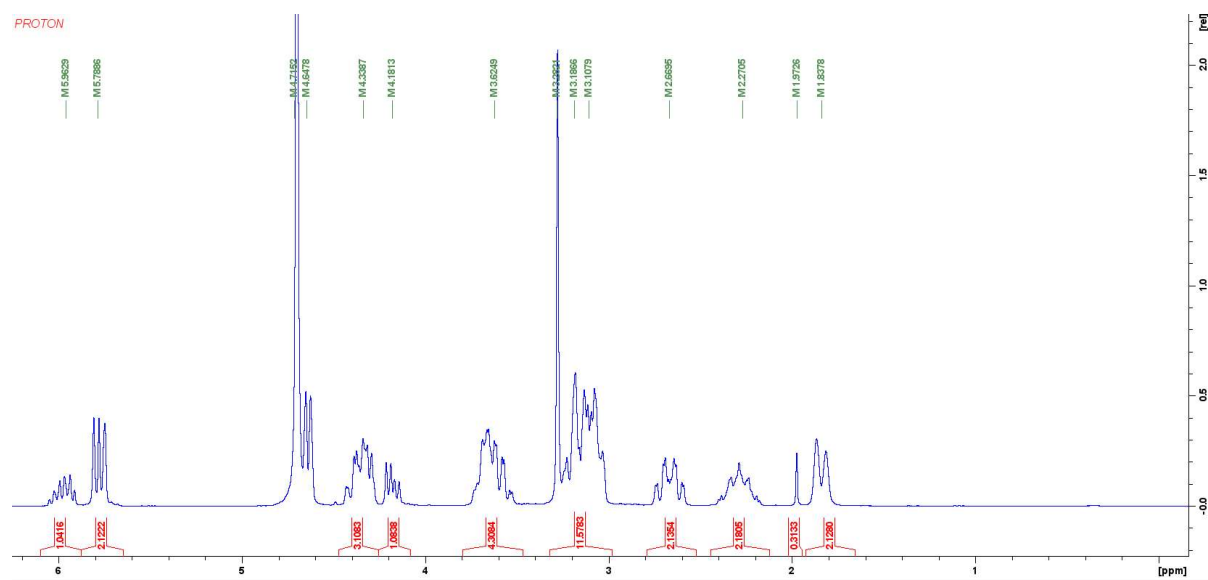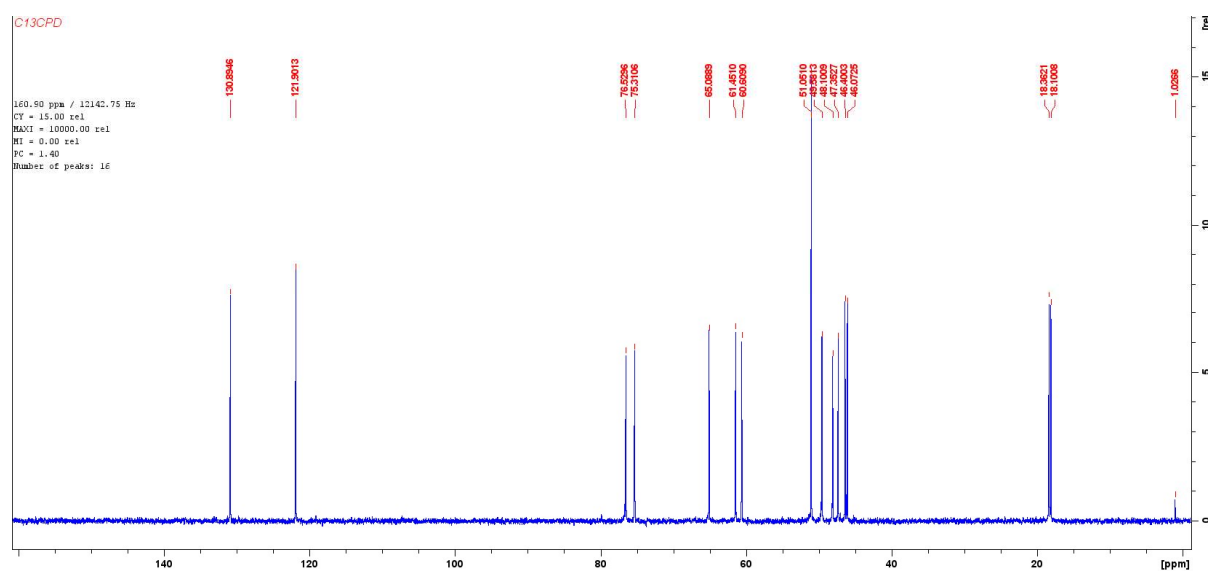

Figure S3. a)  $^1\text{H}$  NMR (a) and  $^{13}\text{C}$  NMR (b) spectra for **L3**.

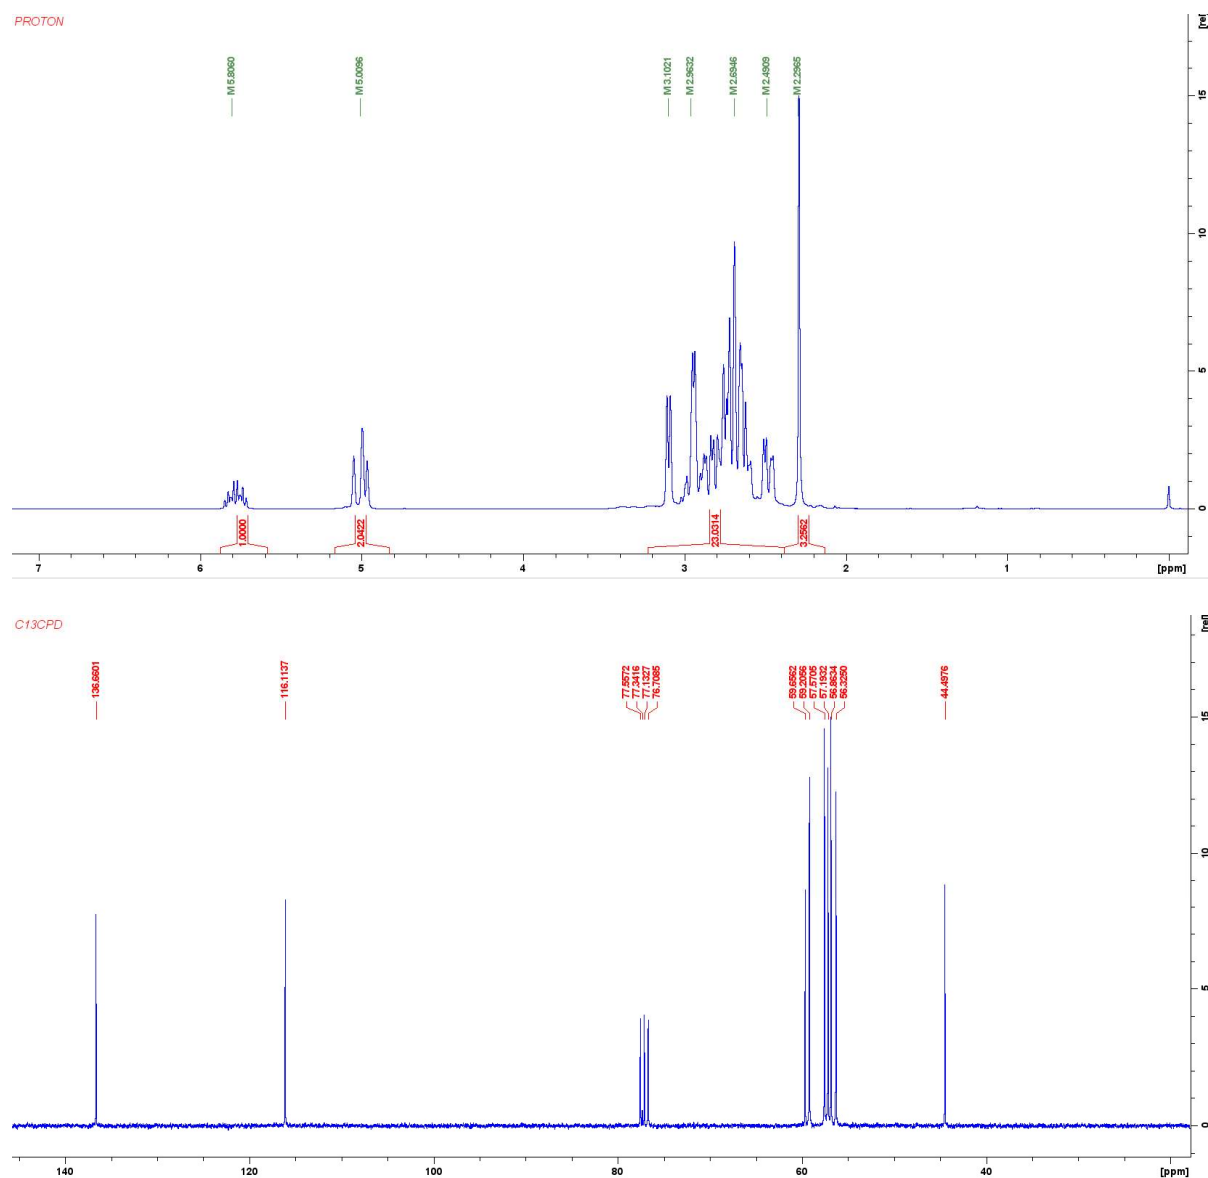

Figure S4. a)  $^1\text{H}$  NMR (a) and  $^{13}\text{C}$  NMR (b) spectra for **L4**.

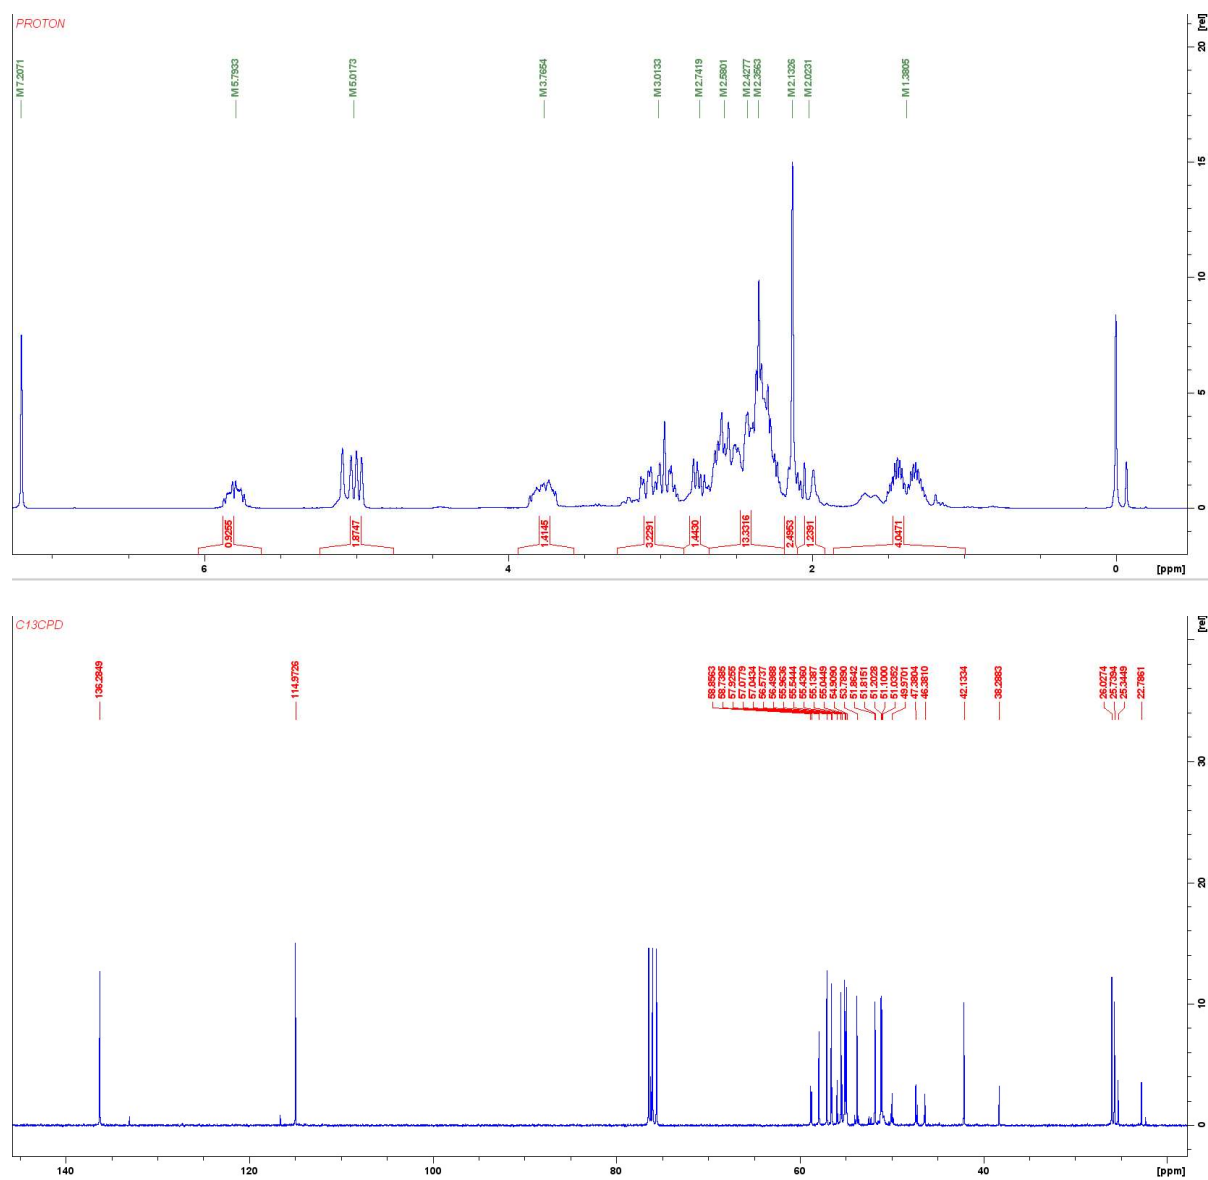

Figure S5. a)  $^1\text{H}$  NMR (a) and  $^{13}\text{C}$  NMR (b) spectra for **7**.

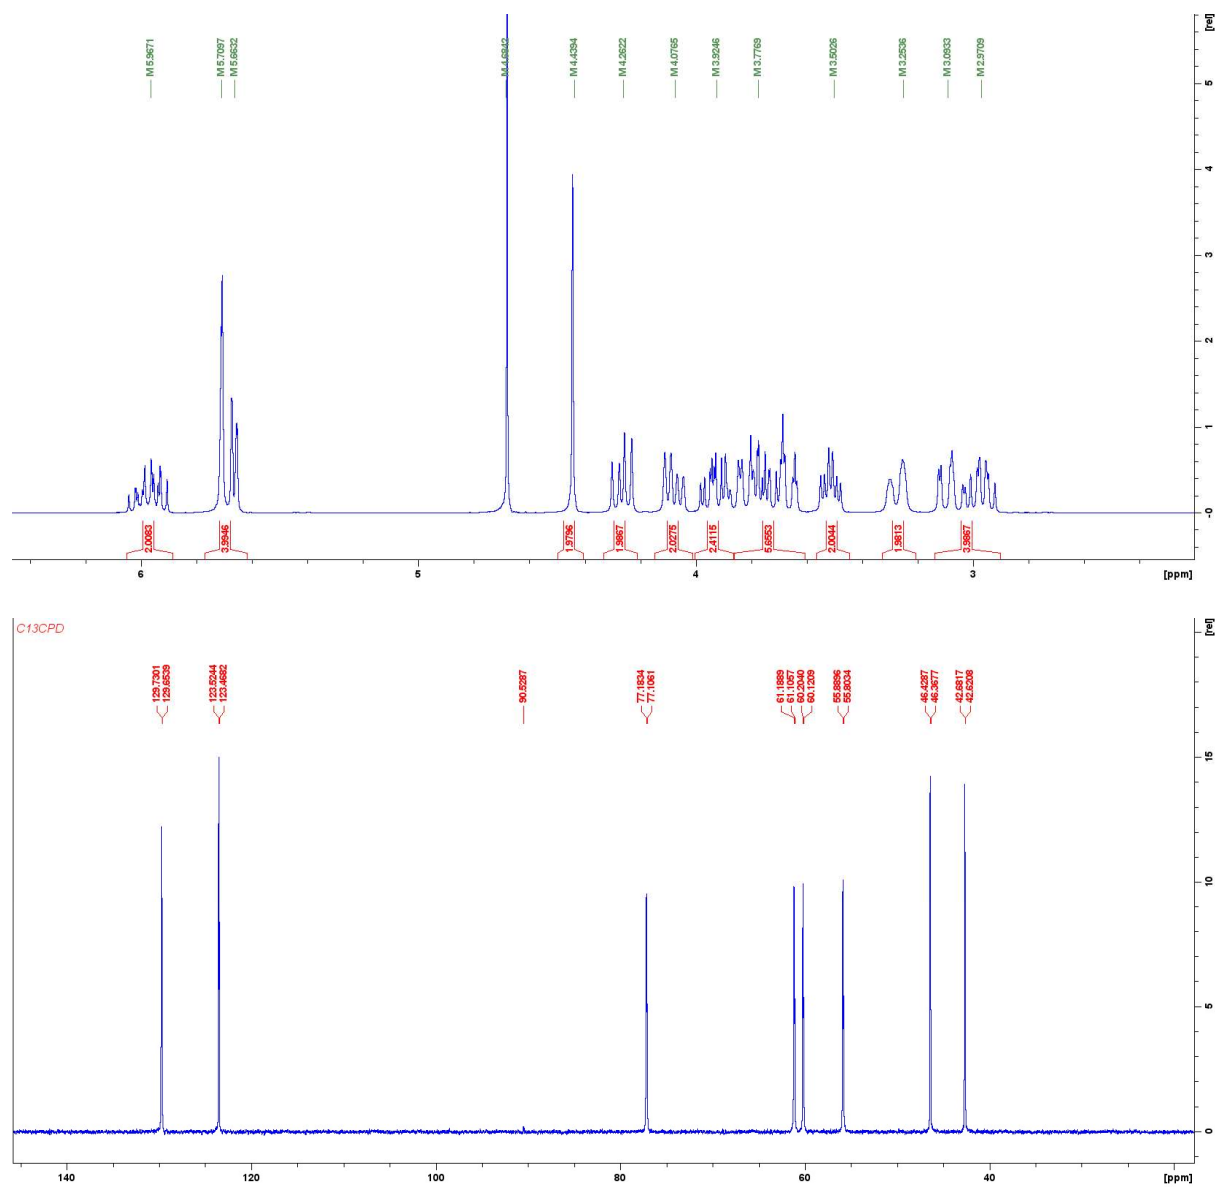

Figure S6. a)  $^1\text{H}$  NMR (a) and  $^{13}\text{C}$  NMR (b) spectra for **8**.

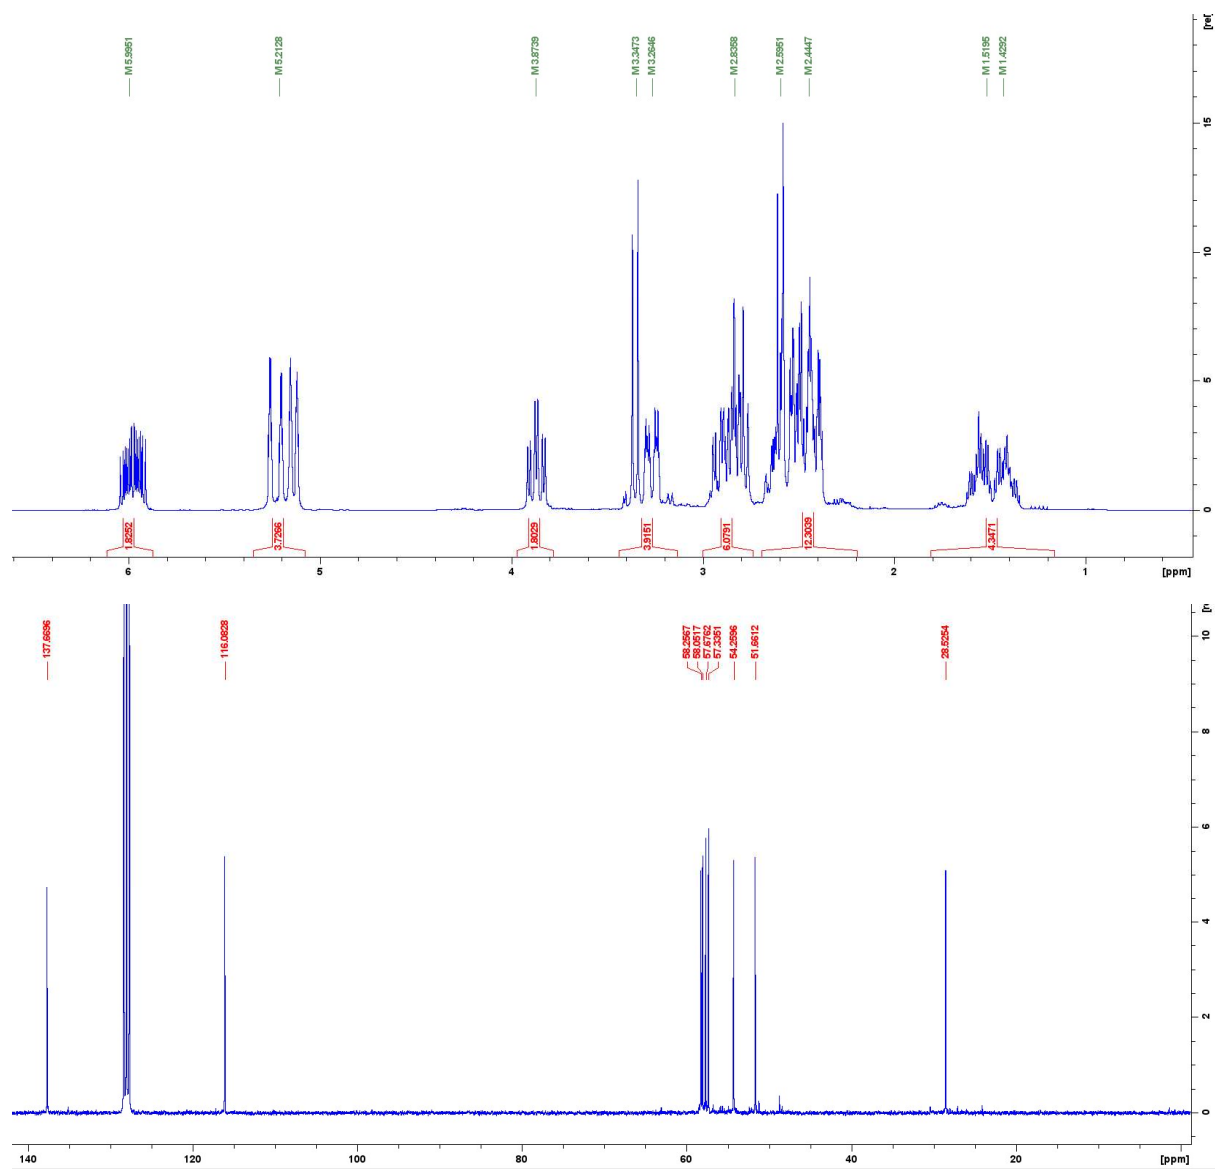

Figure S7. a)  $^1\text{H}$  NMR (a) and  $^{13}\text{C}$  NMR (b) spectra for **L9**.

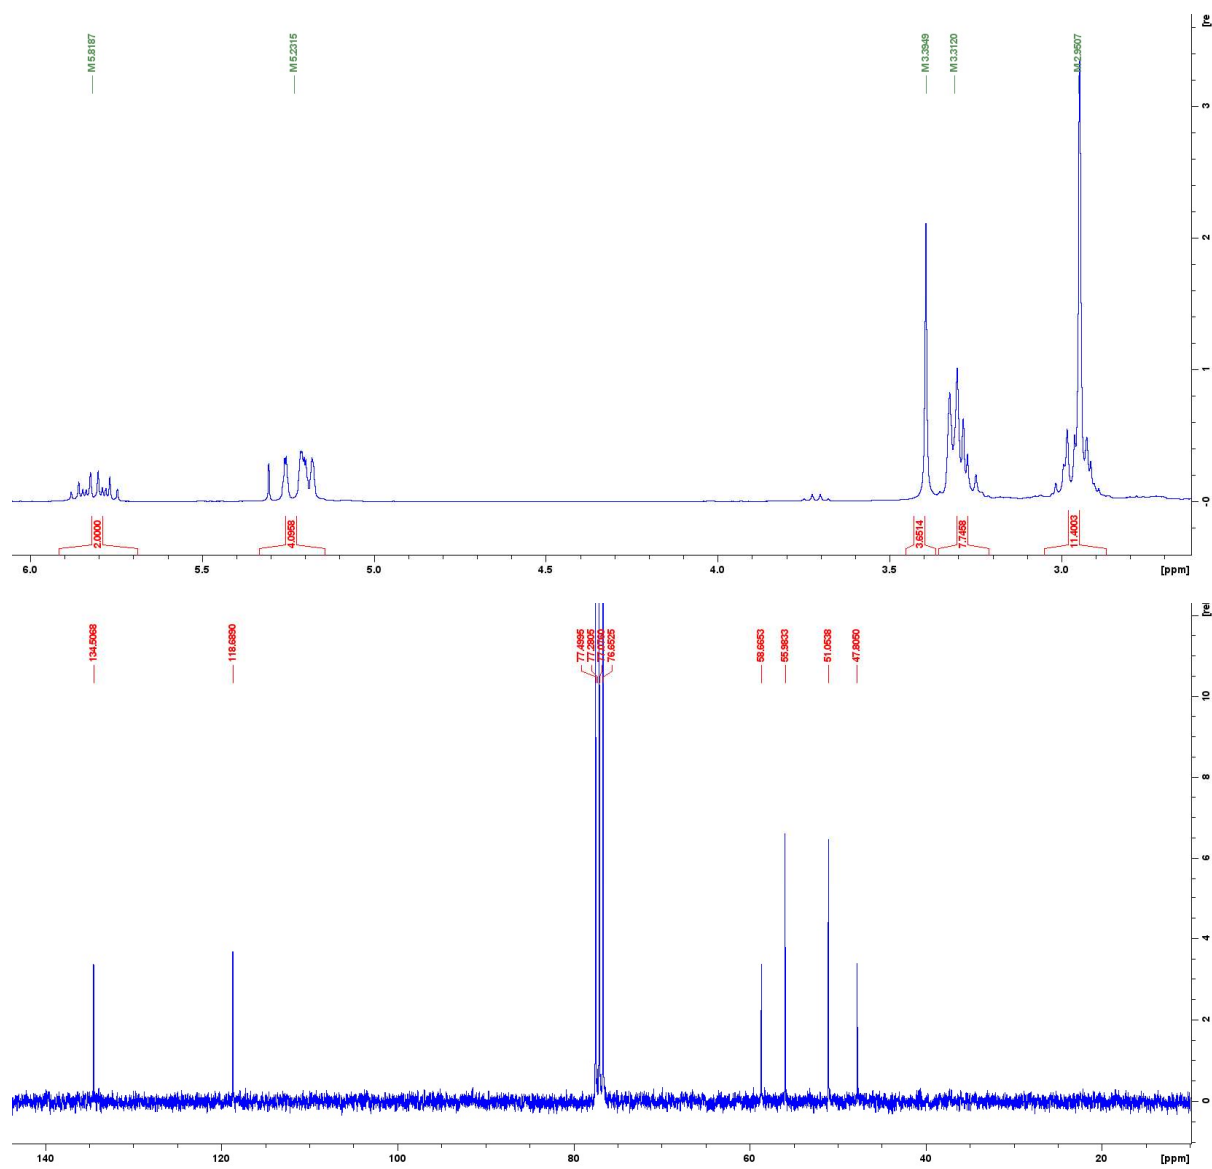



Figure S8. a)  $^1\text{H}$  NMR (a) and  $^{13}\text{C}$  NMR (b) spectra for **L10**.

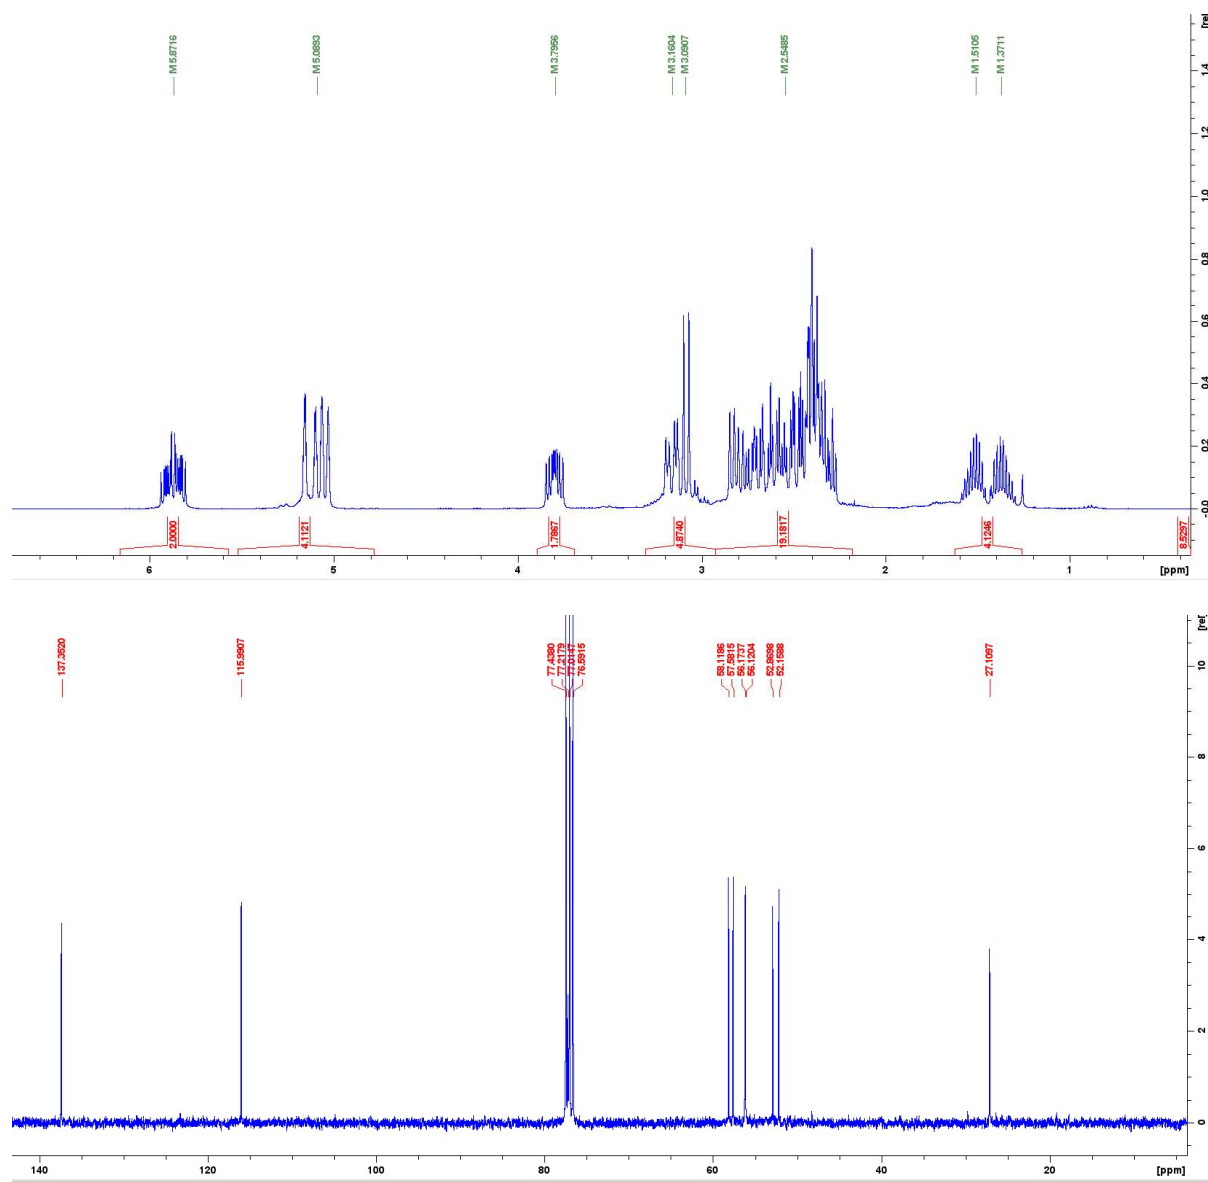

Figure S9. a)  $^1\text{H}$  NMR (a) and  $^{13}\text{C}$  NMR (b) spectra for **11**.

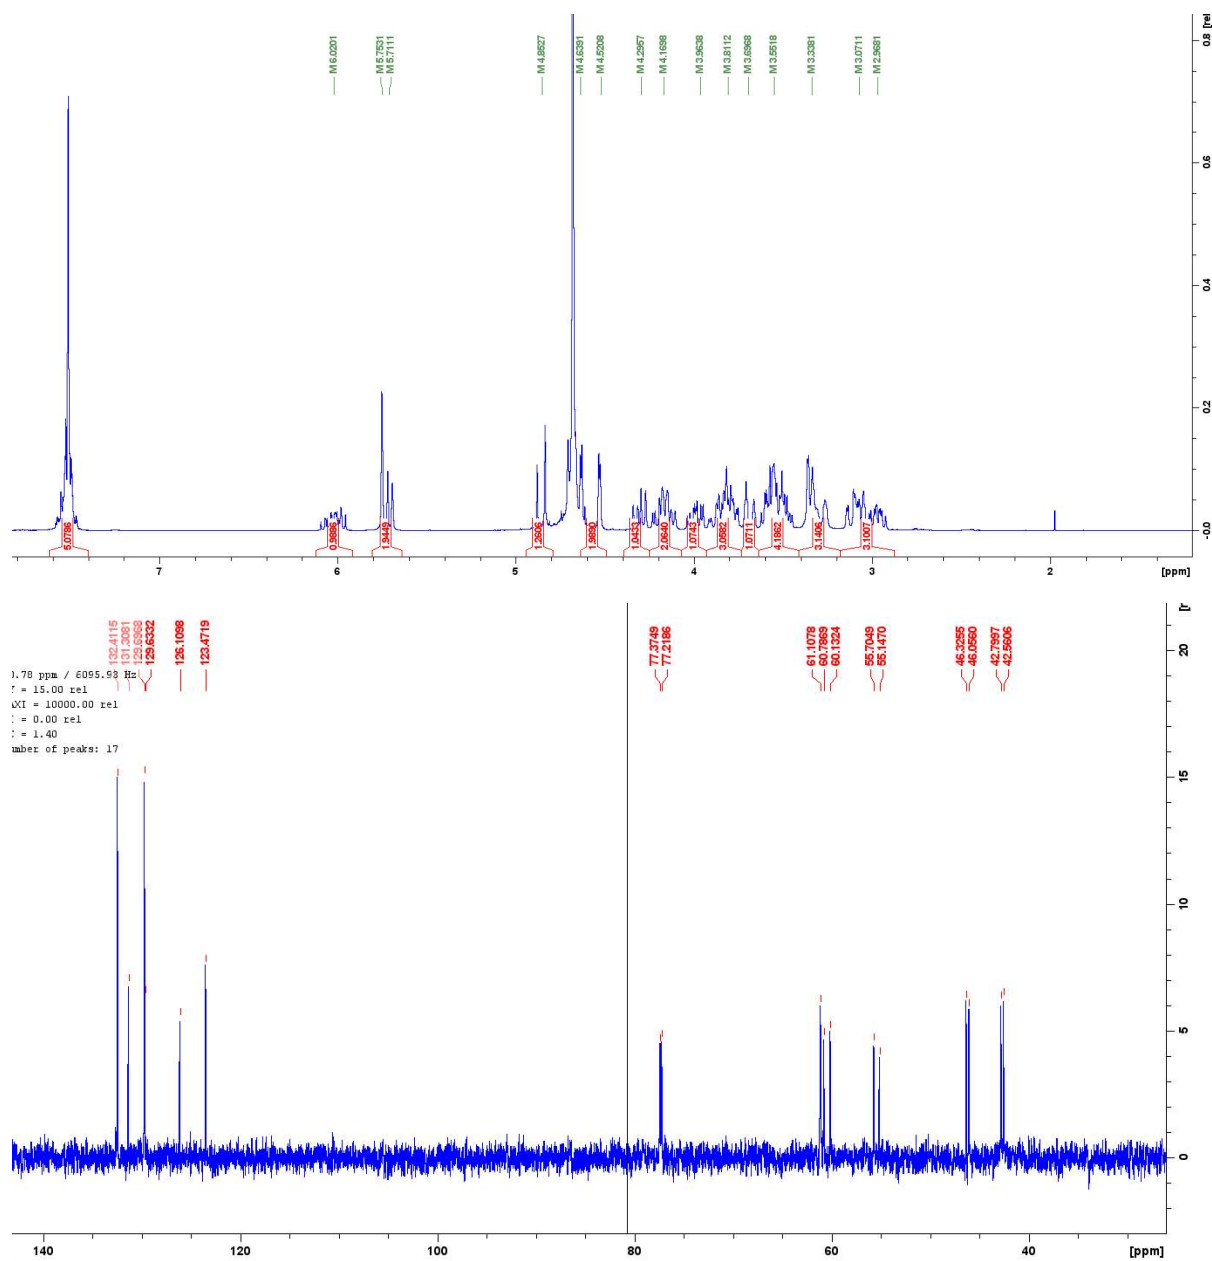

Figure S10. a)  $^1\text{H}$  NMR (a) and  $^{13}\text{C}$  NMR (b) spectra for **12**.

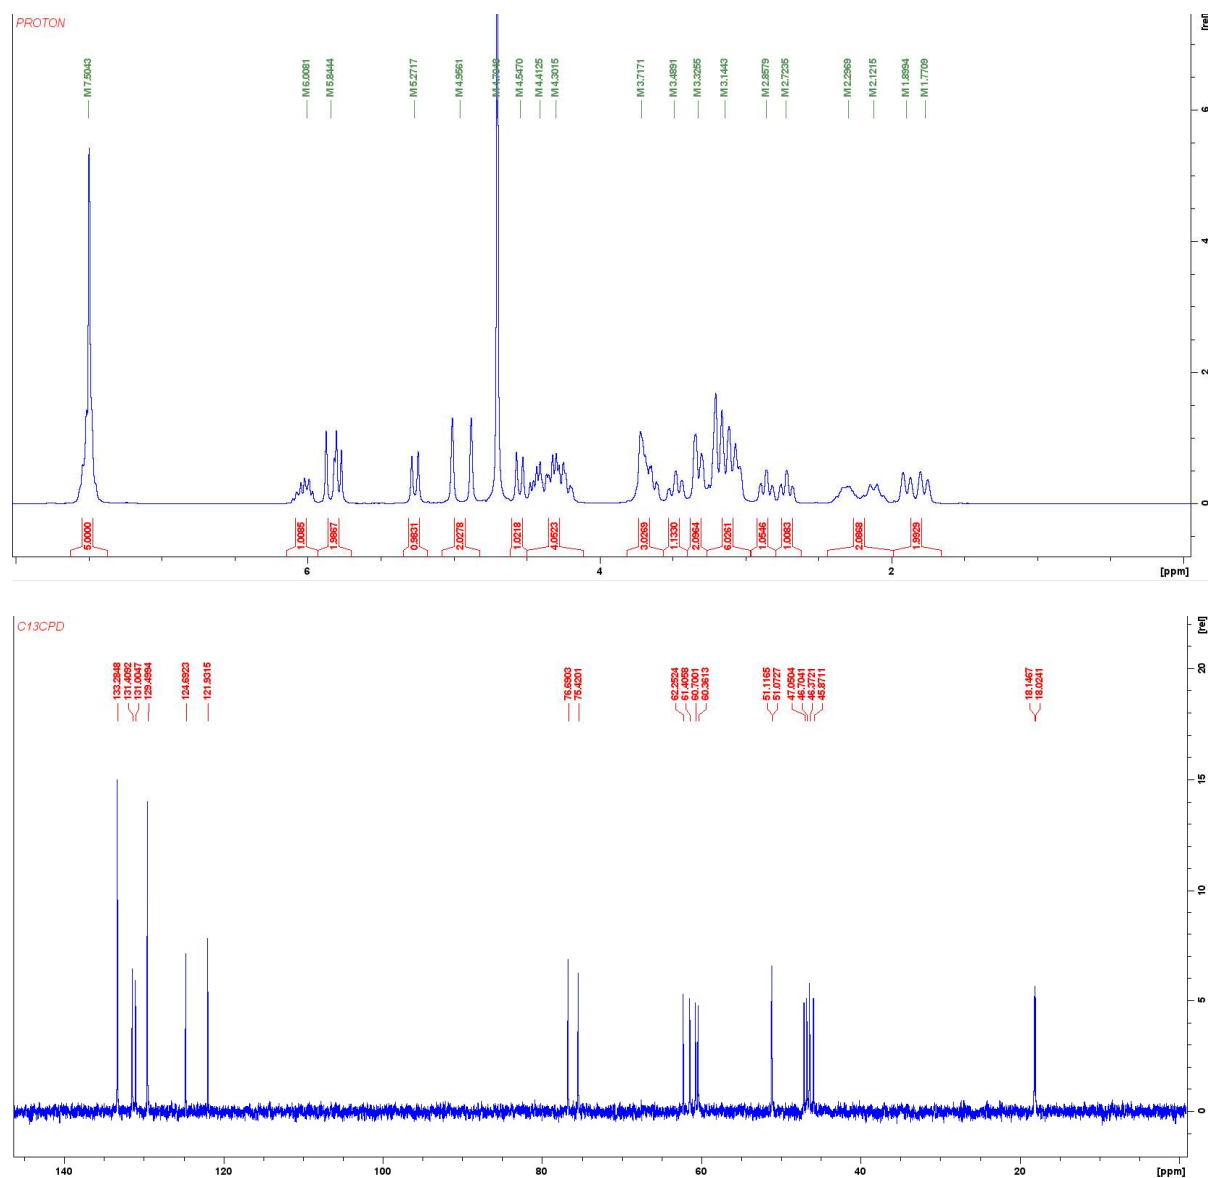

Figure S11. a)  $^1\text{H}$  NMR (a) and  $^{13}\text{C}$  NMR (b) spectra for **L11**.

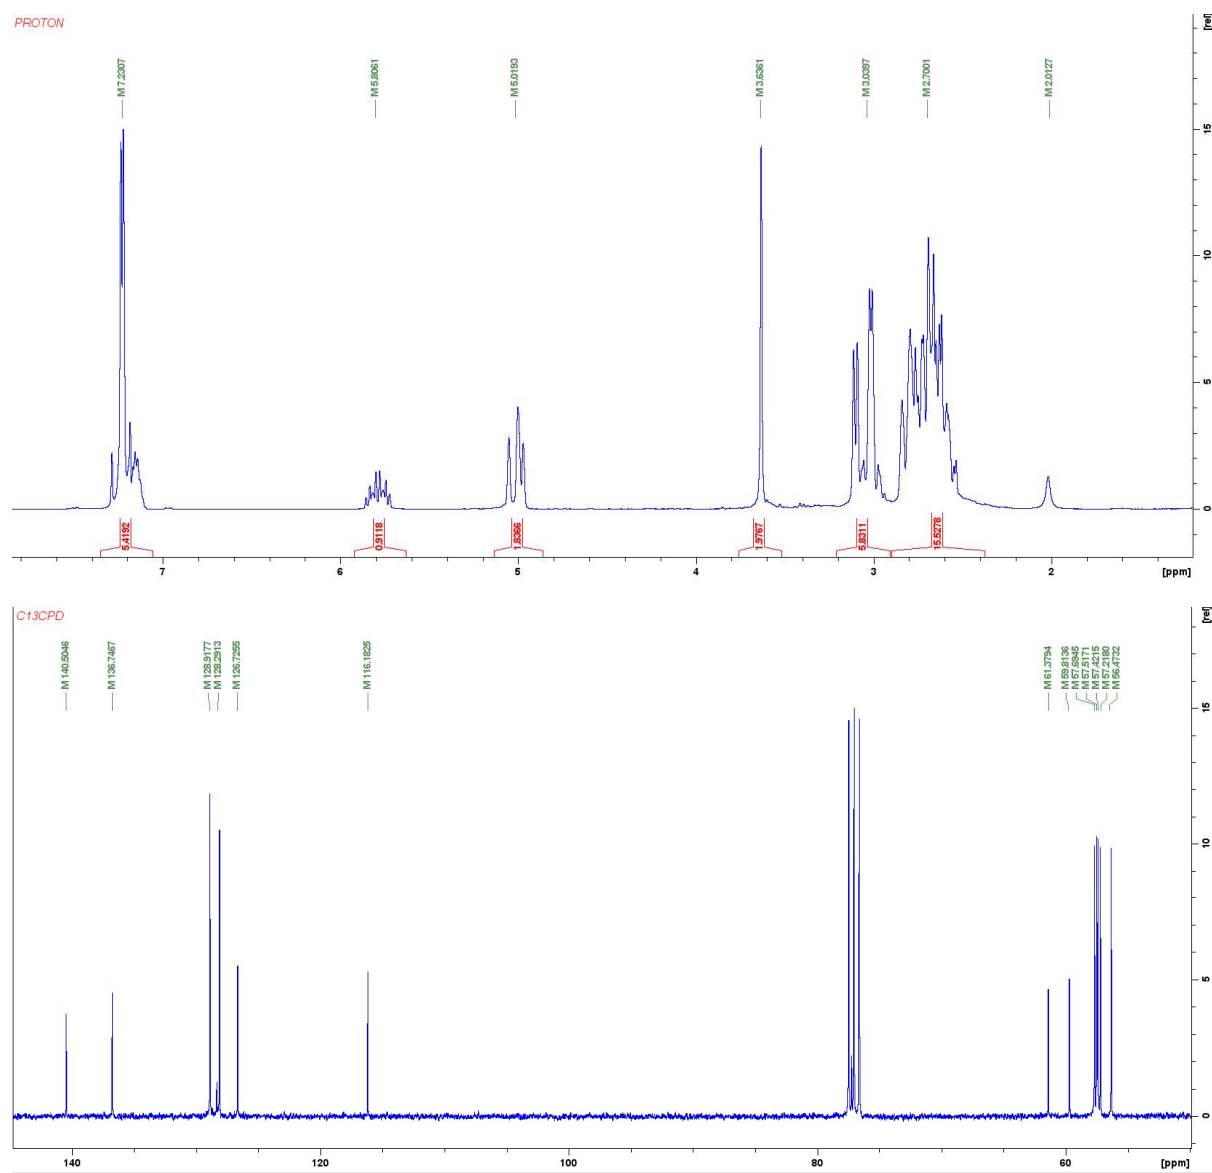

Figure S12. a)  $^1\text{H}$  NMR (a) and  $^{13}\text{C}$  NMR (b) spectra for **L12**.

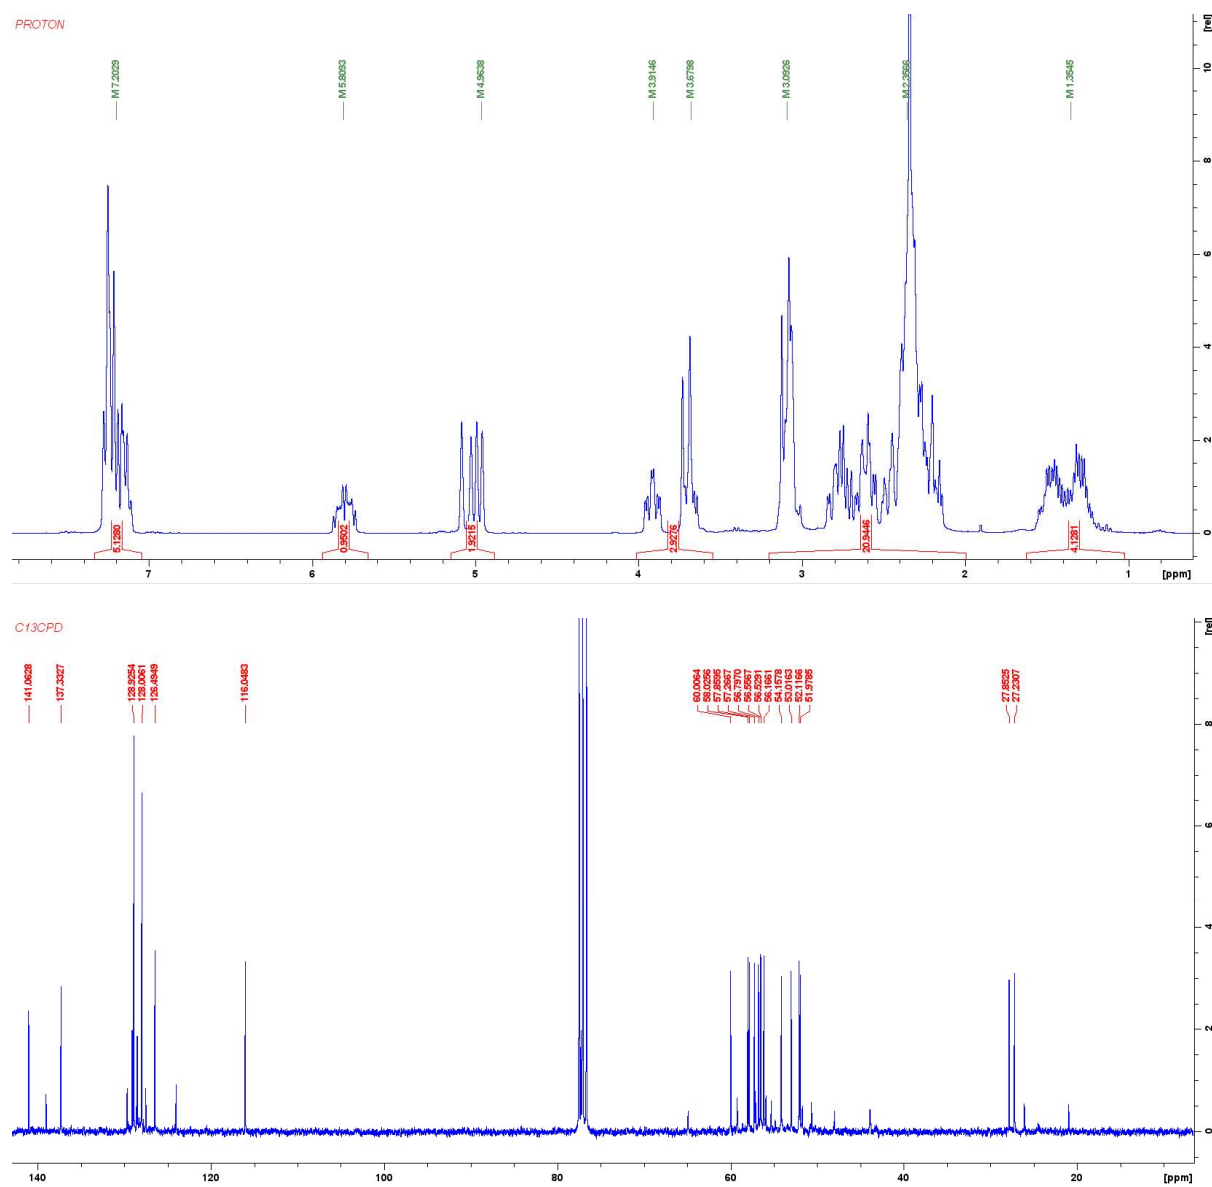

Figure S13. Example of Kinetic Decomplexation Plot to Determine  $t_{1/2}$  for Copper Complexes.  
 $[\text{Cu}(\text{H}_2\text{Bcyclam})\text{Cl}]\text{PF}_6$  decomplexation in 5M HCl at 50 °C.

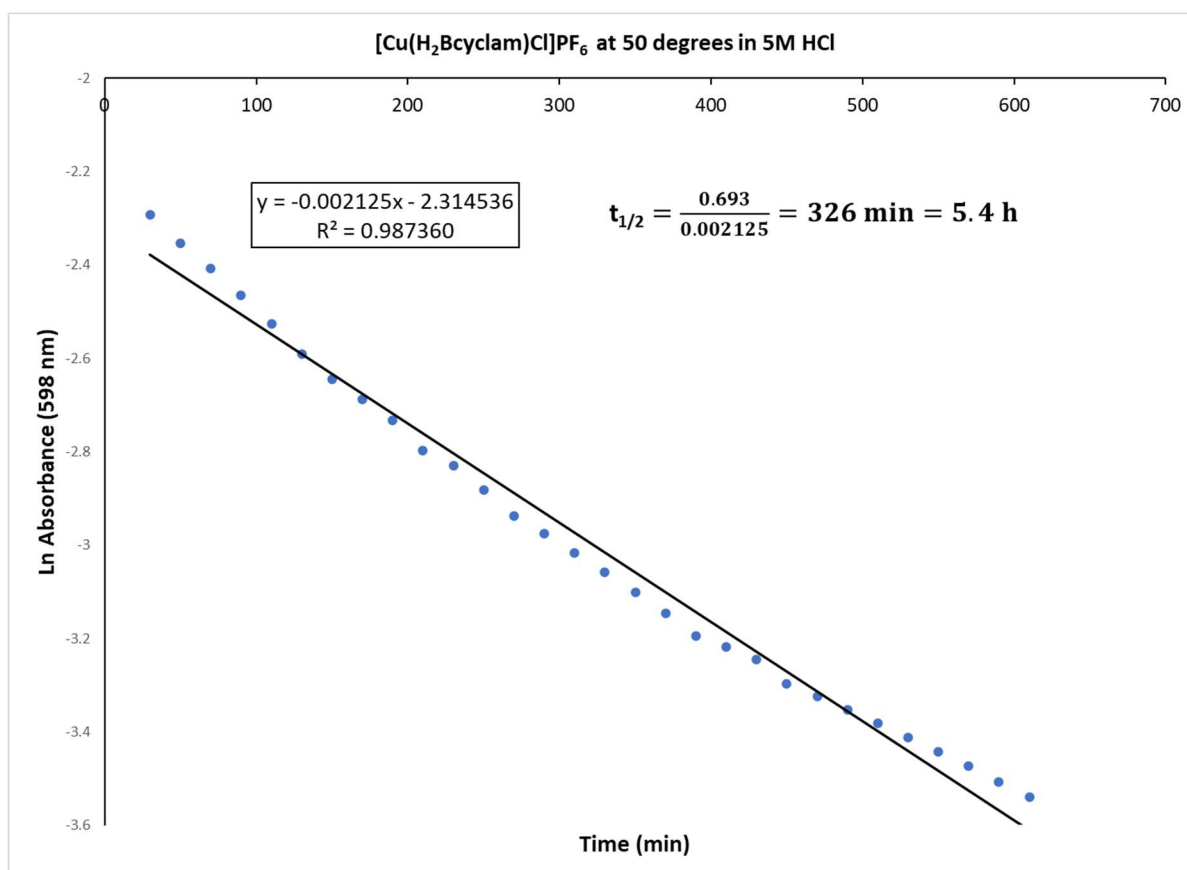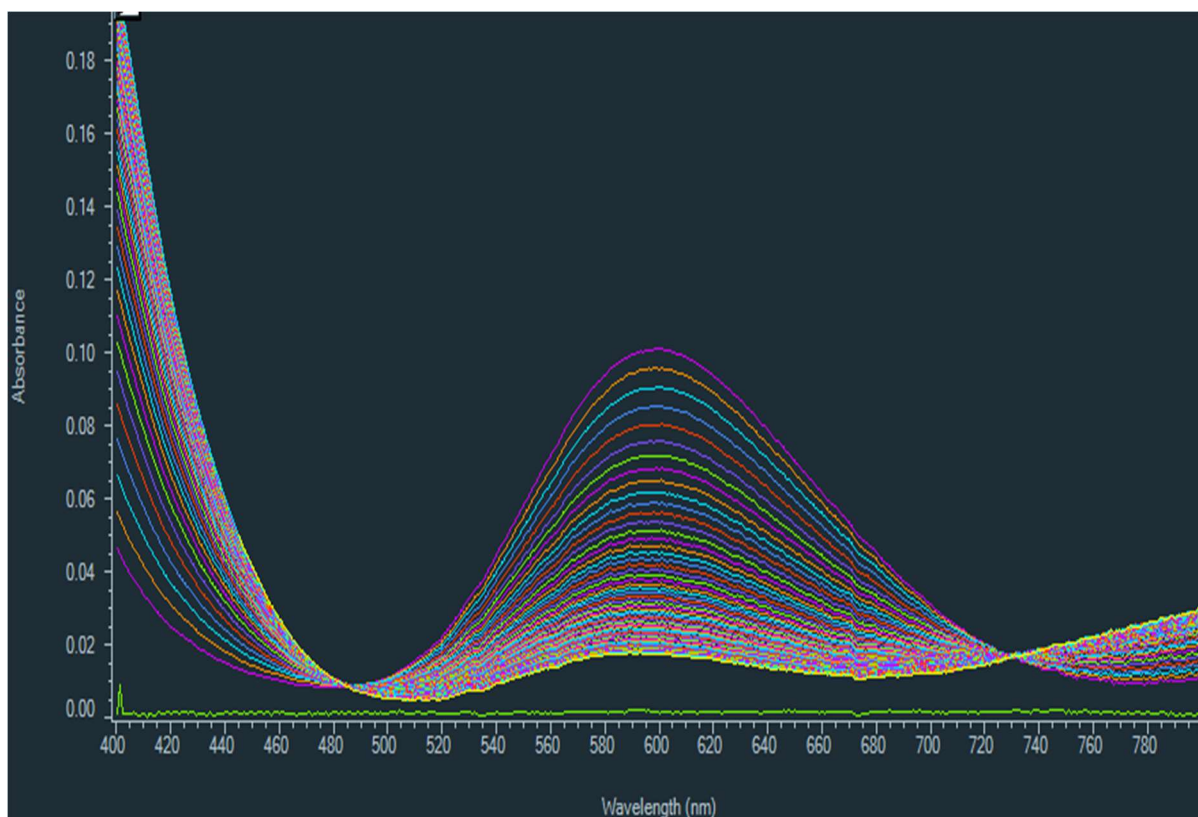

Figure S14. Cyclic Voltammograms in MeCN for (a)  $\text{MnL3Cl}_2$  and (b)  $\text{FeL3Cl}_2$ .

(a)

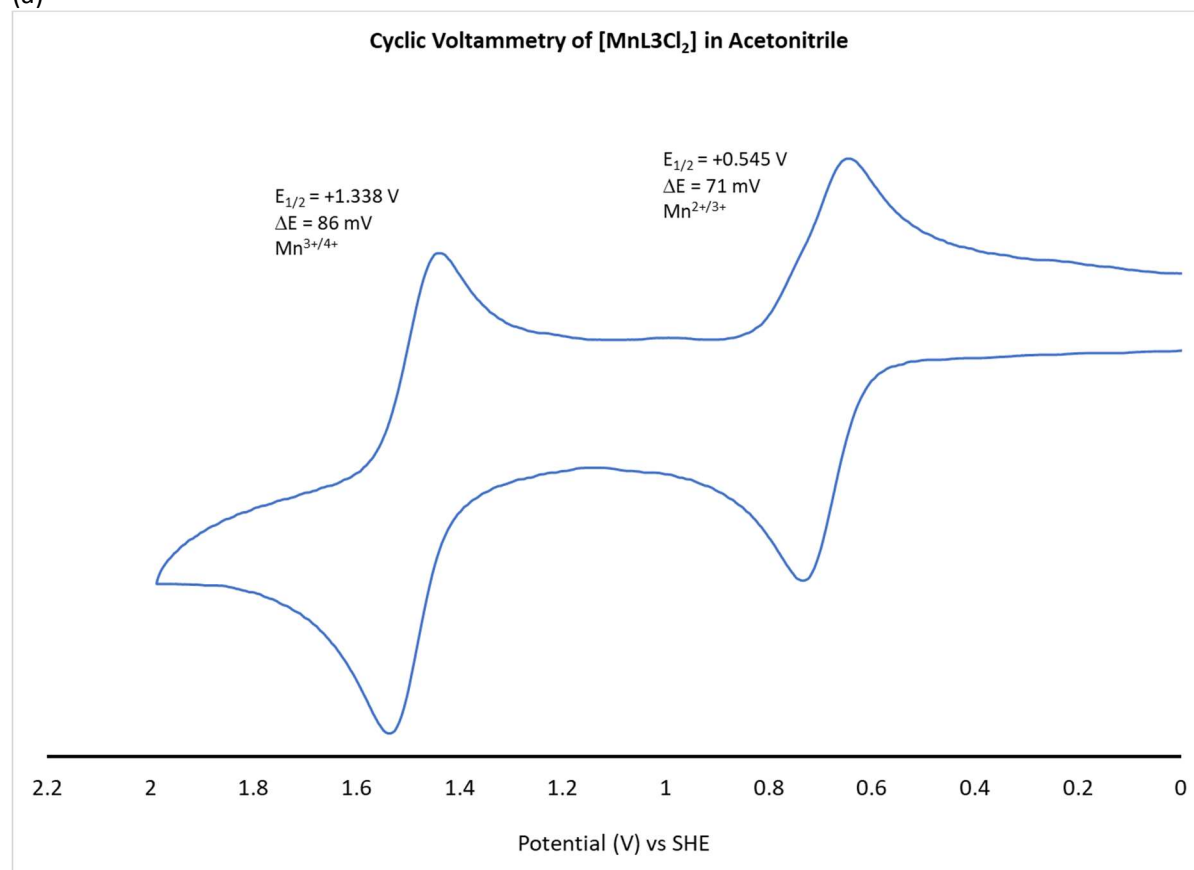

(b)

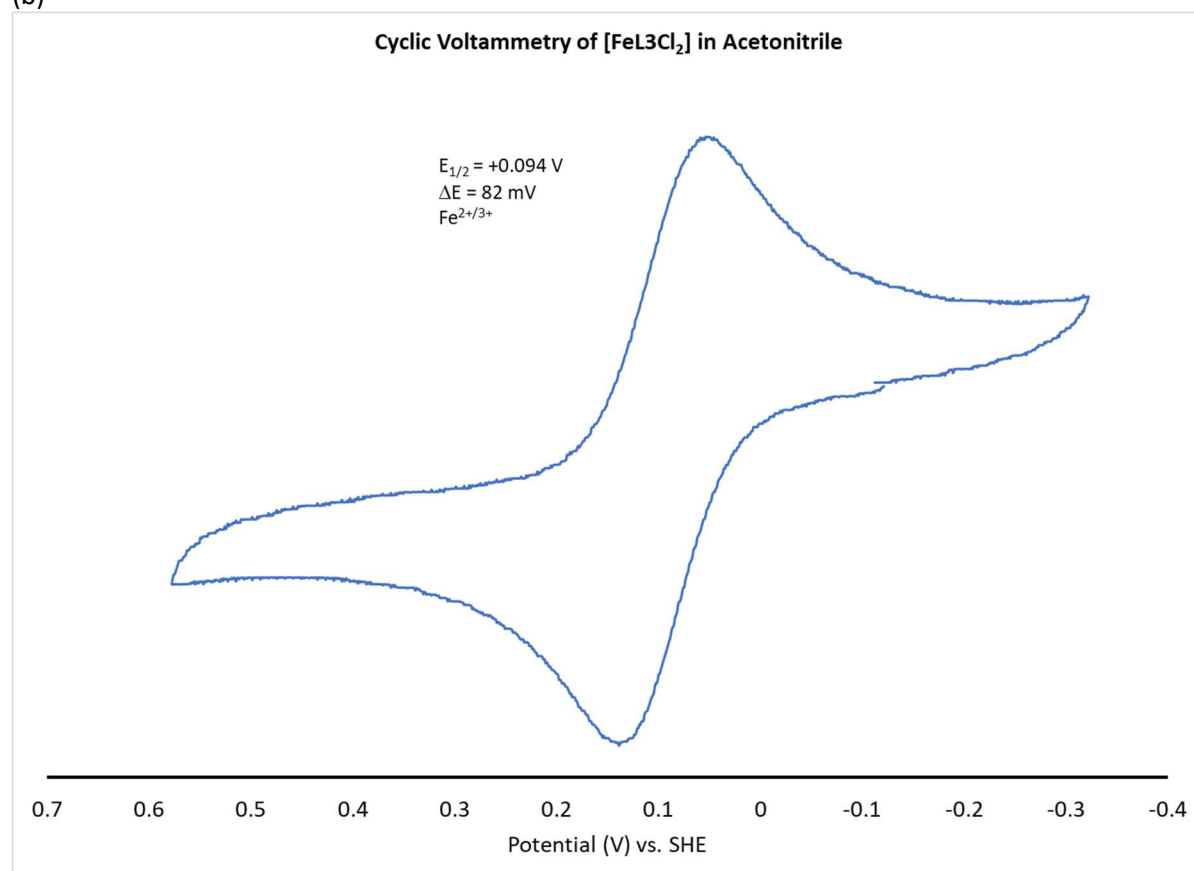

Figure S15. Cyclic Voltammograms in MeCN for (a)  $\text{MnL4Cl}_2$  and (b)  $\text{FeL4Cl}_2$ .

(a)

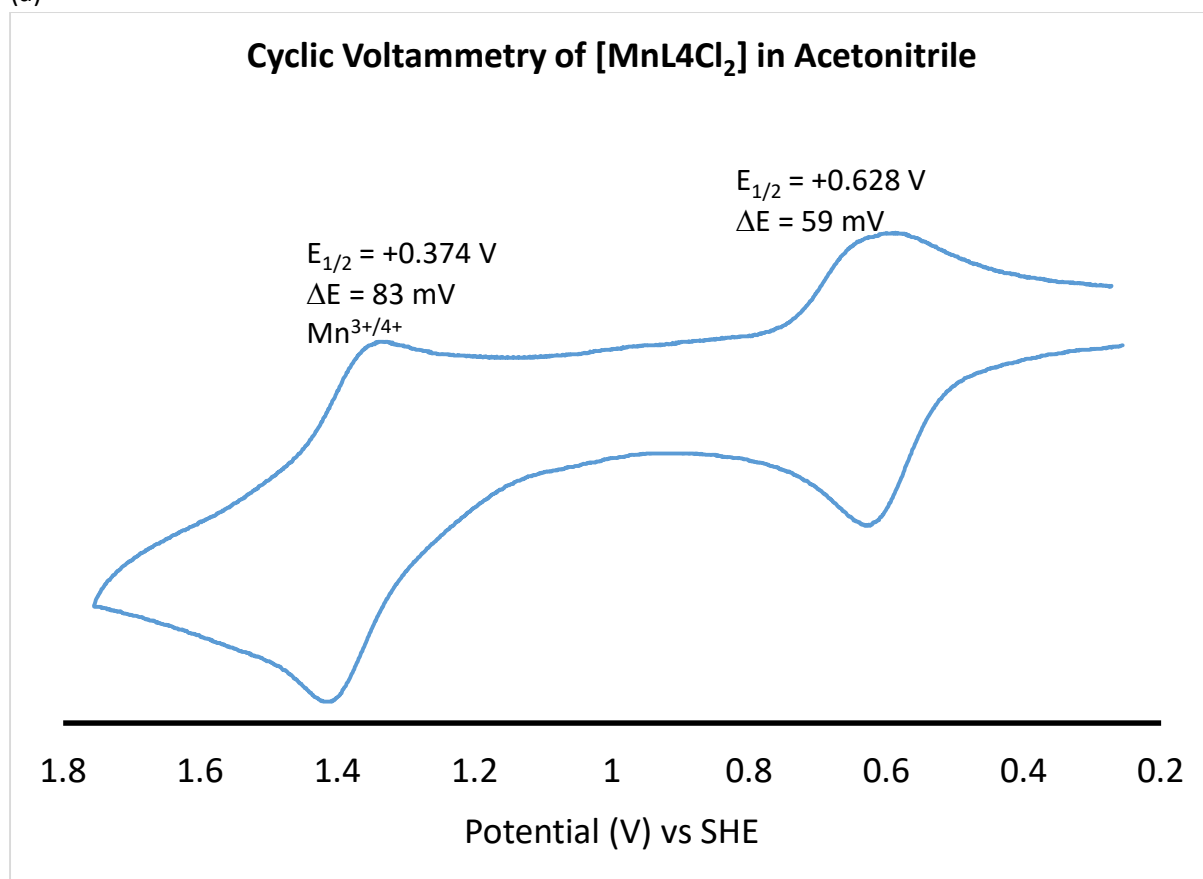

(b)

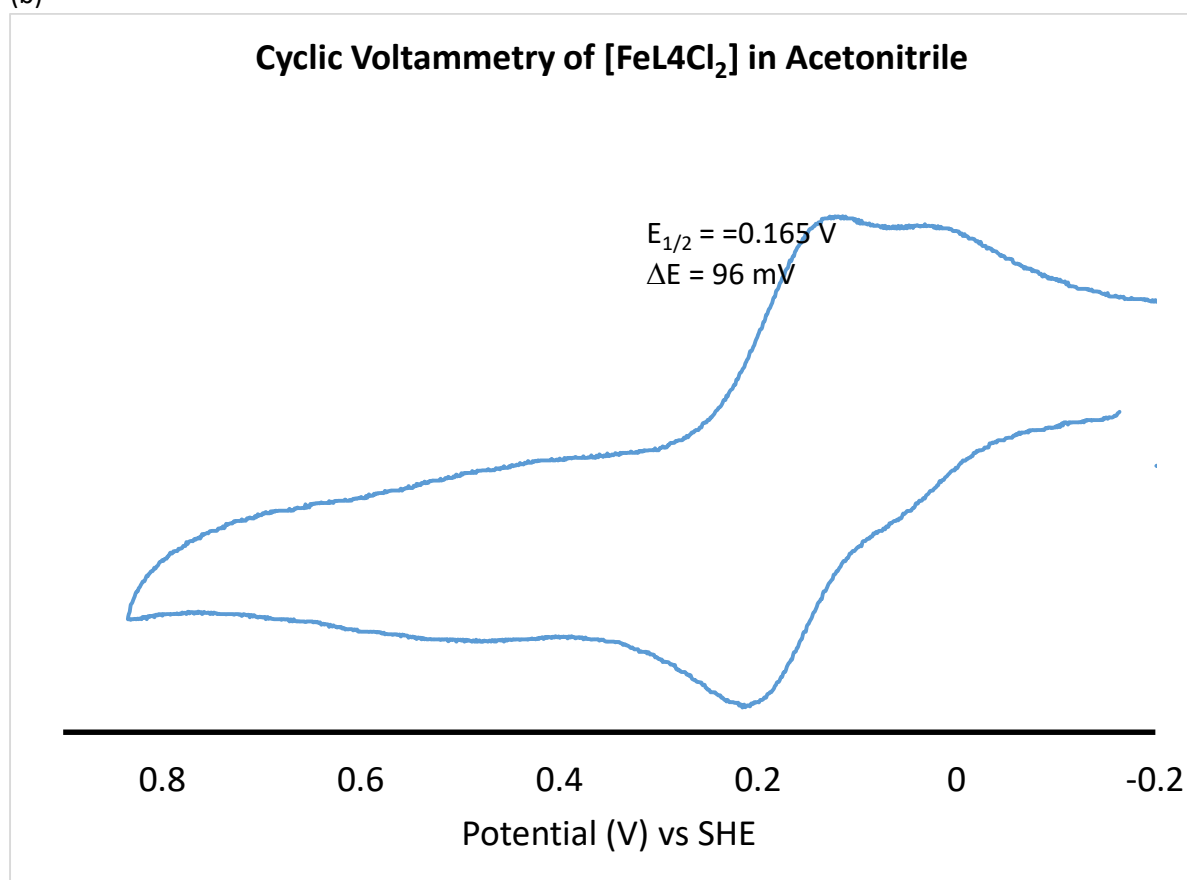



Figure S16. Cyclic Voltammograms in MeCN for (a)  $\text{MnL7Cl}_2$  and (b)  $\text{FeL7Cl}_2$ .

(a)

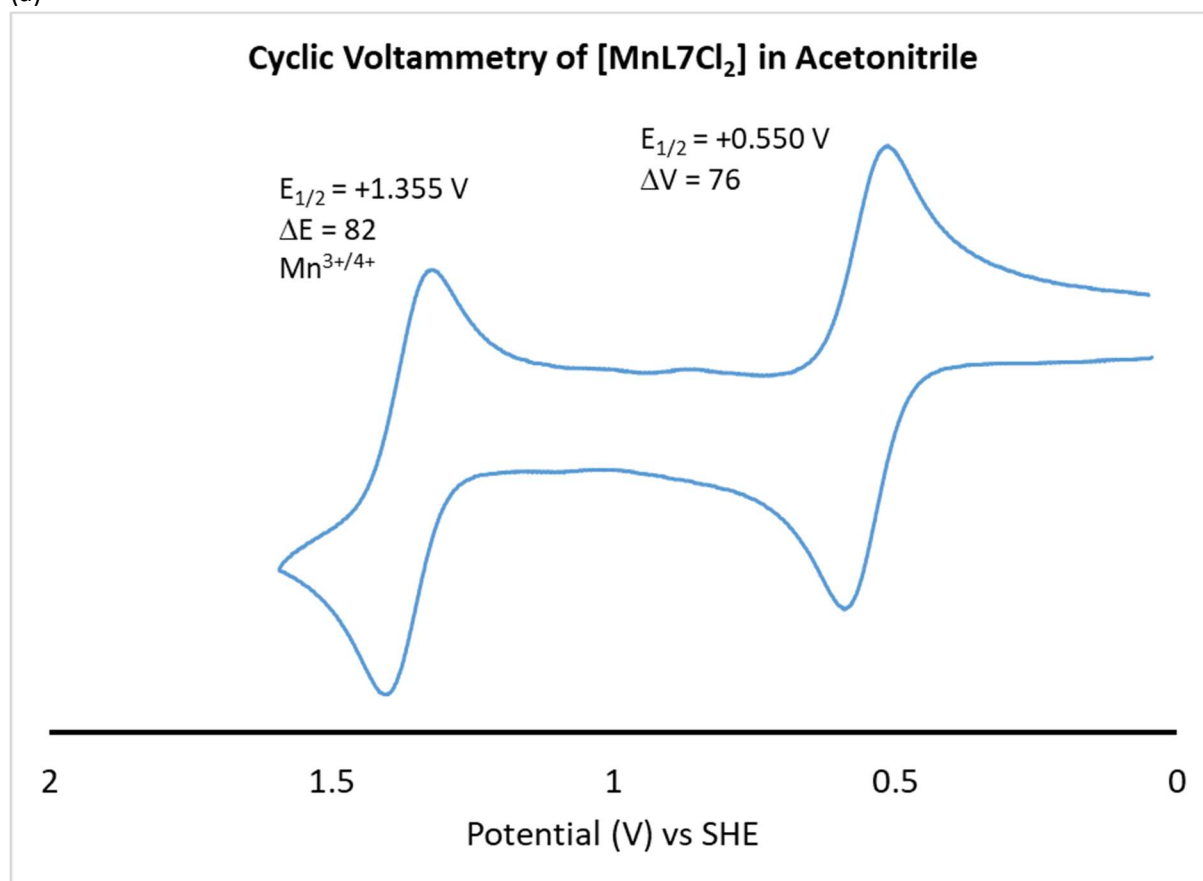

(b)

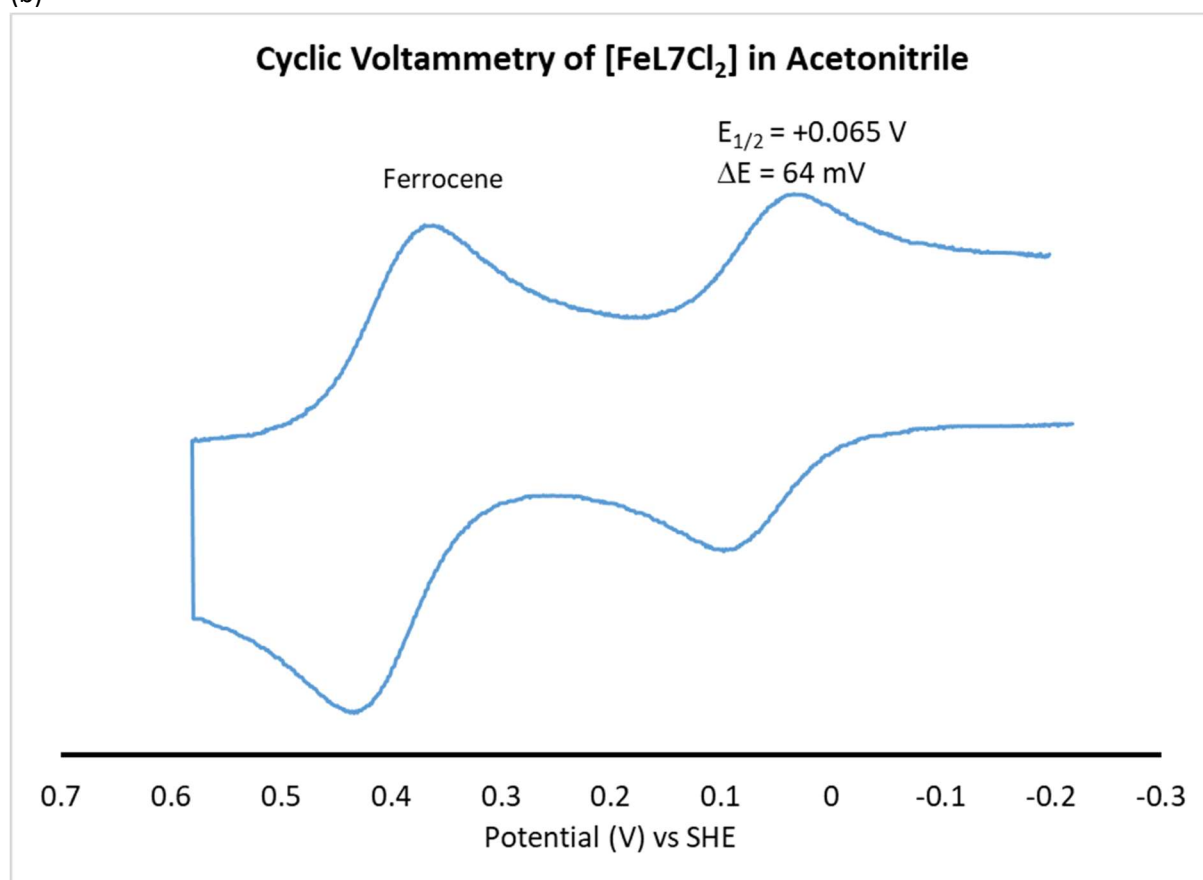

Figure S17. Cyclic Voltammograms in MeCN for (a)  $\text{MnL8Cl}_2$  and (b)  $\text{FeL8Cl}_2$ .

(a)

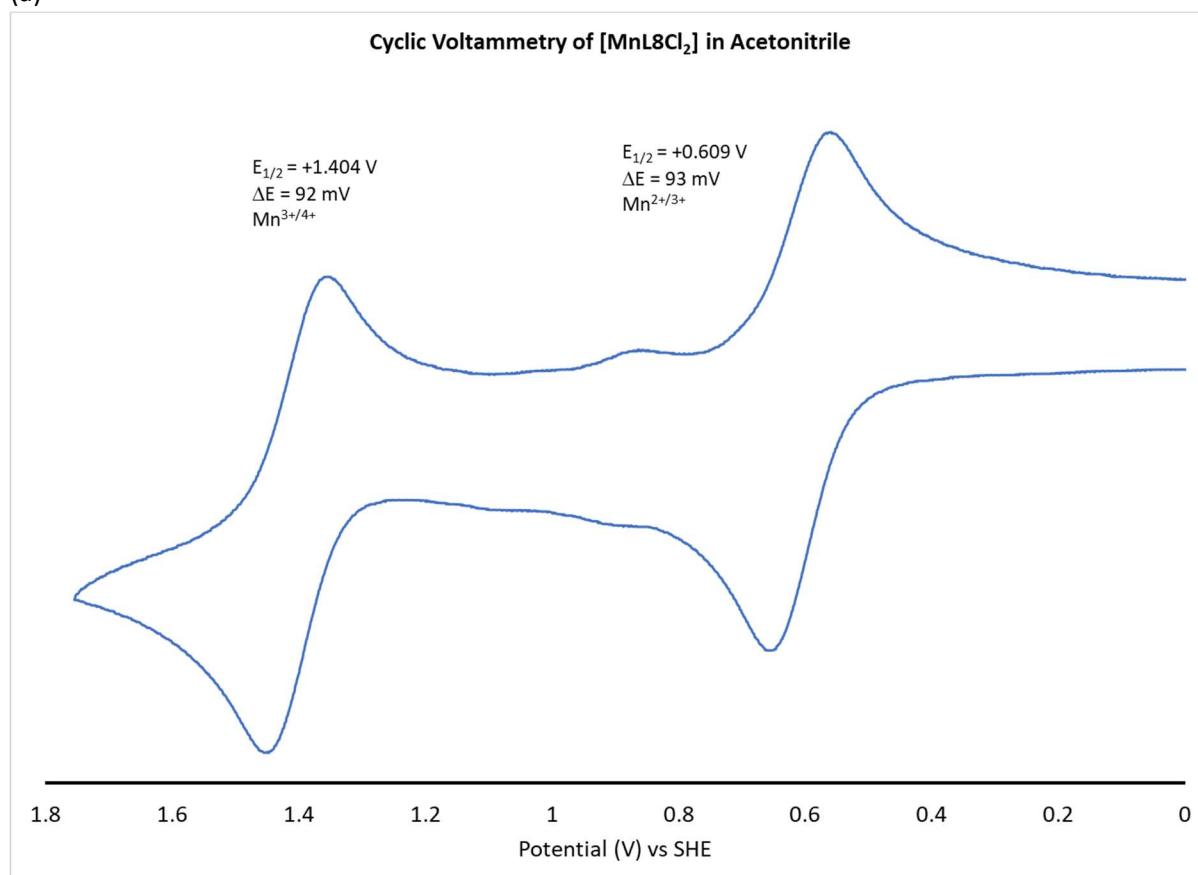

(b)

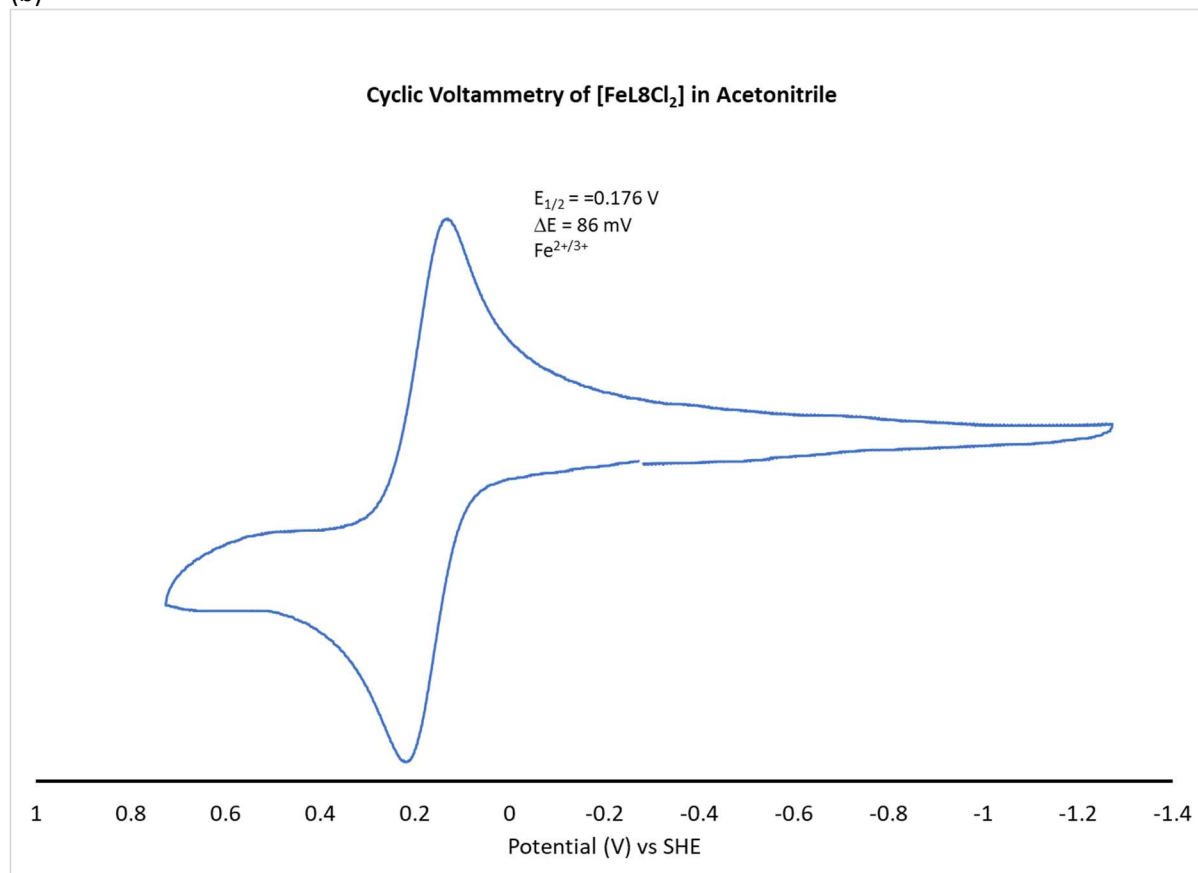

Figure S18. Cyclic Voltammograms in MeCN for (a)  $\text{MnL9Cl}_2$  and (b)  $\text{FeL9Cl}_2$ .

(a)

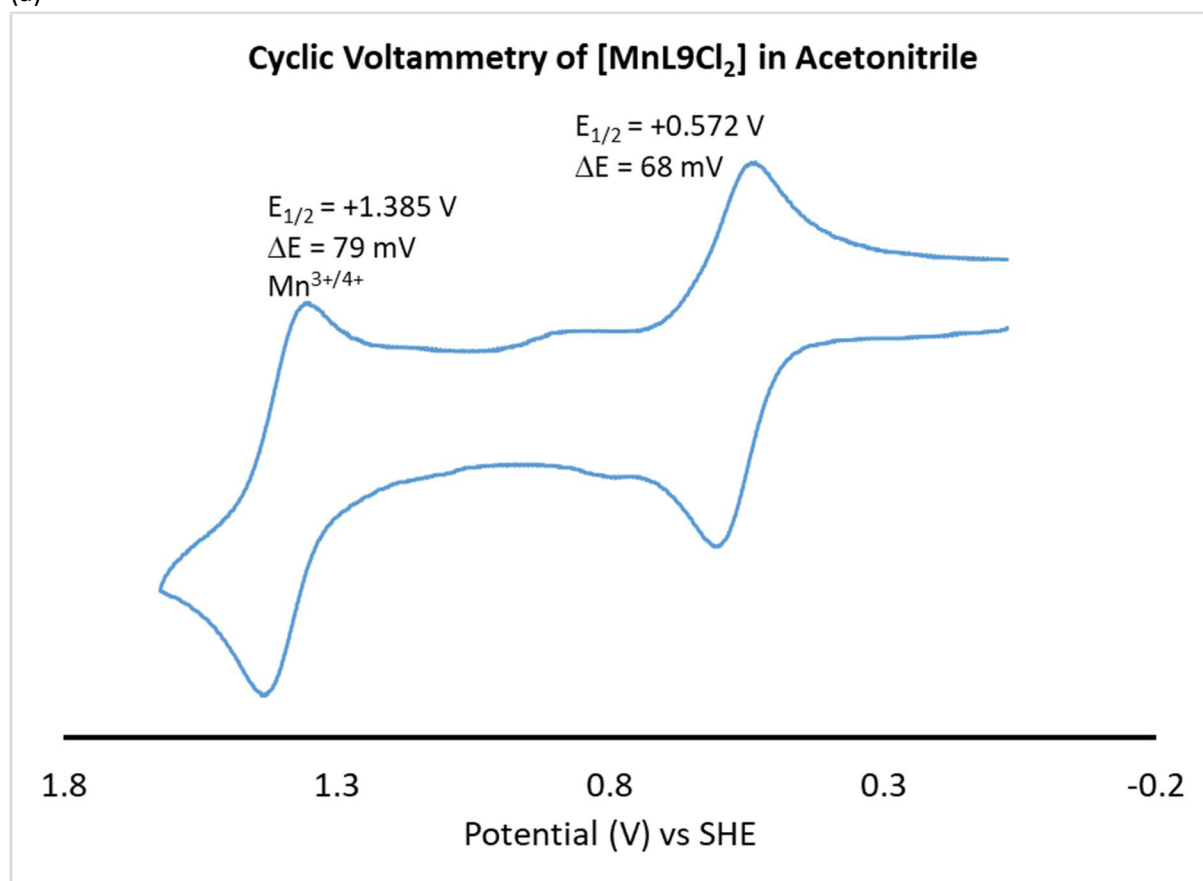

(b)

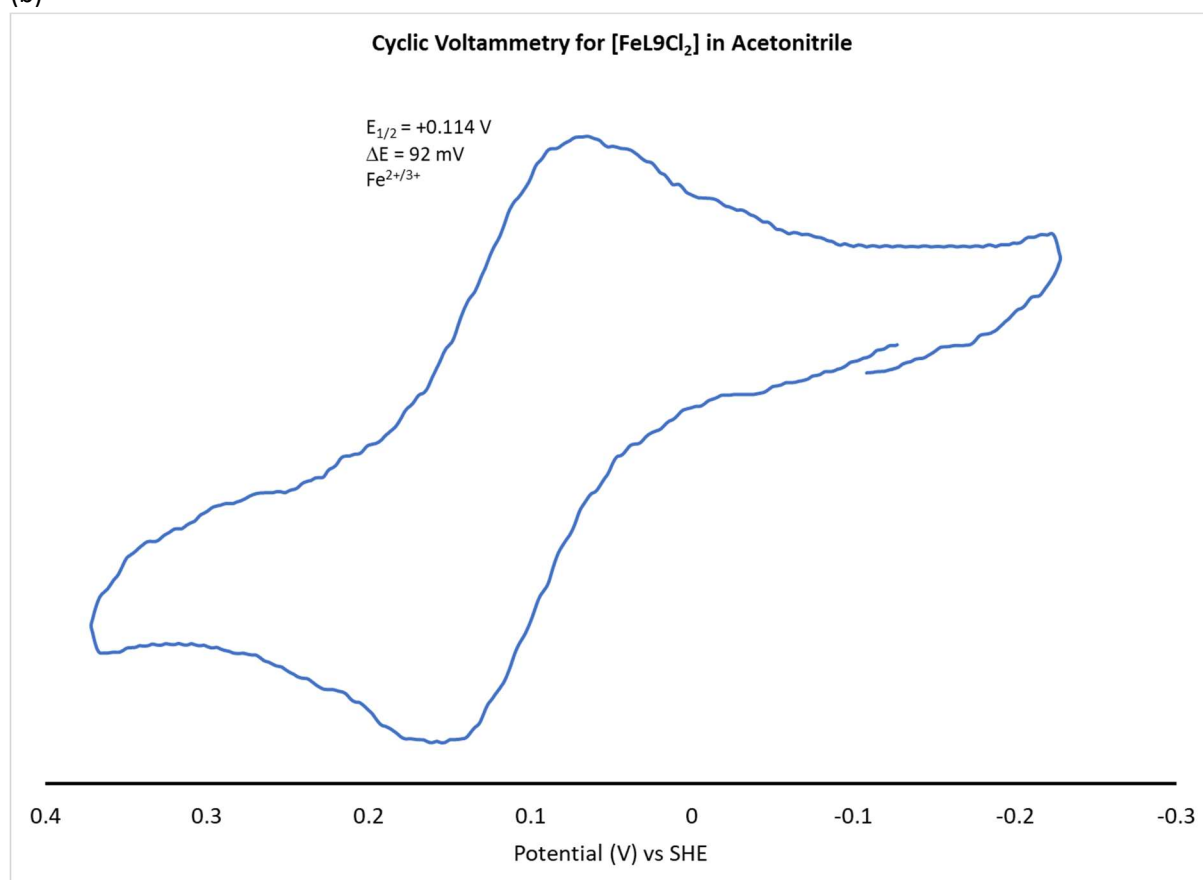

Figure S19. Cyclic Voltammograms in MeCN for (a) MnL10Cl<sub>2</sub> and (b) FeL10Cl<sub>2</sub>.

(a)

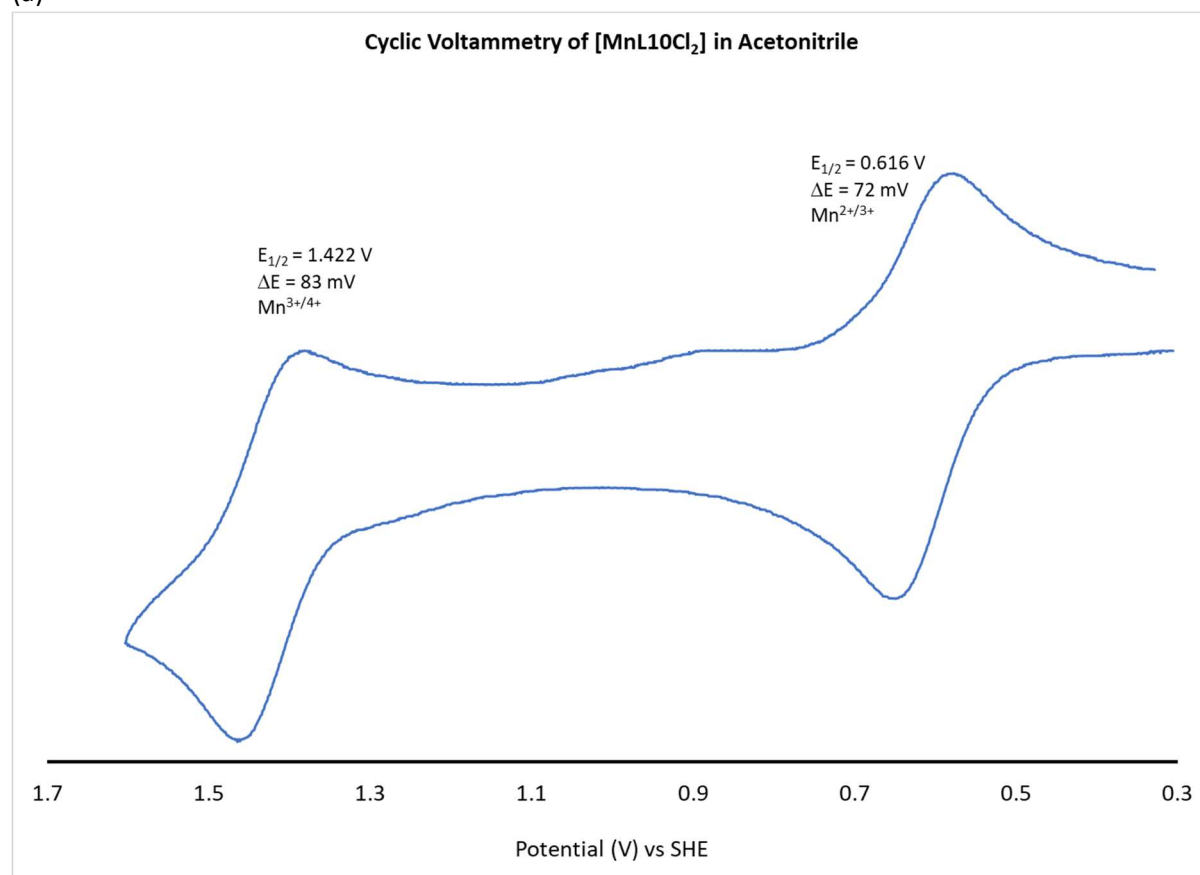

(b)

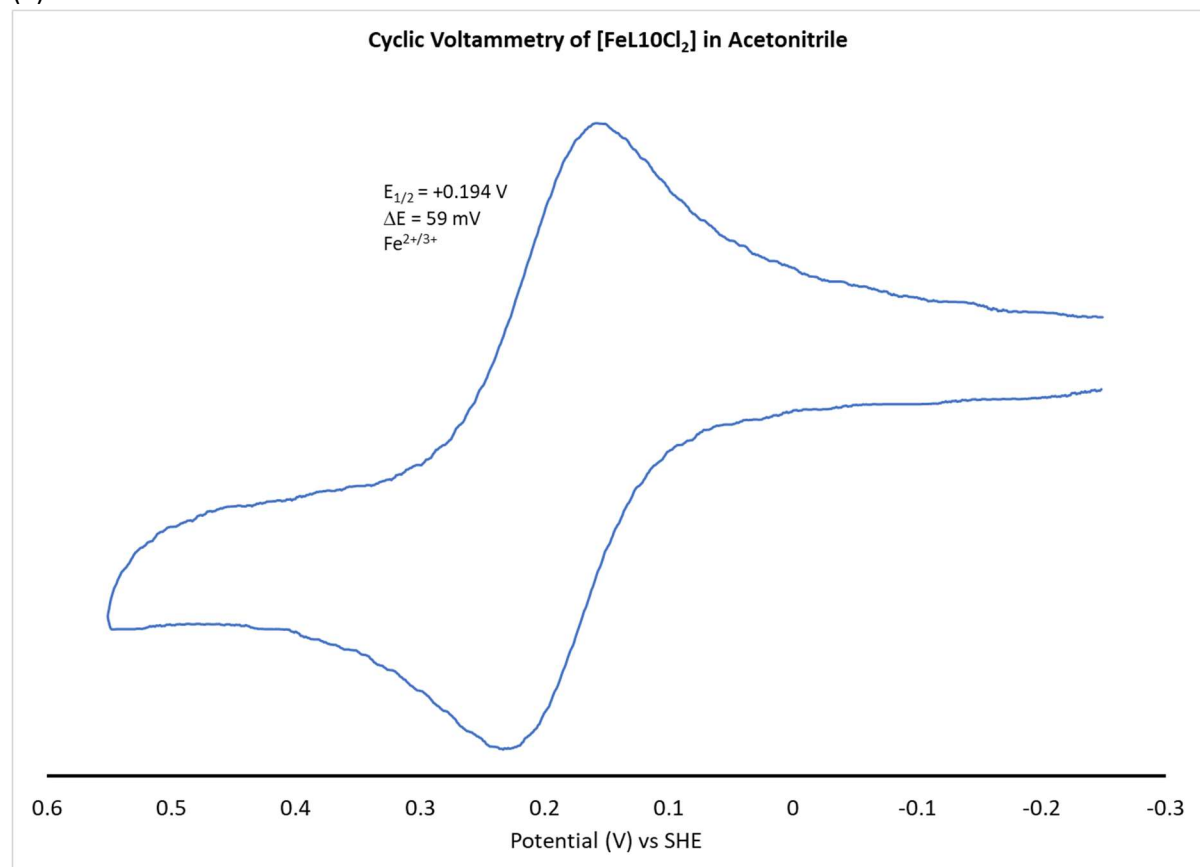

Figure S20. Cyclic Voltammograms in MeCN for (a) MnL11Cl<sub>2</sub> and (b) FeL11Cl<sub>2</sub>.

(a)

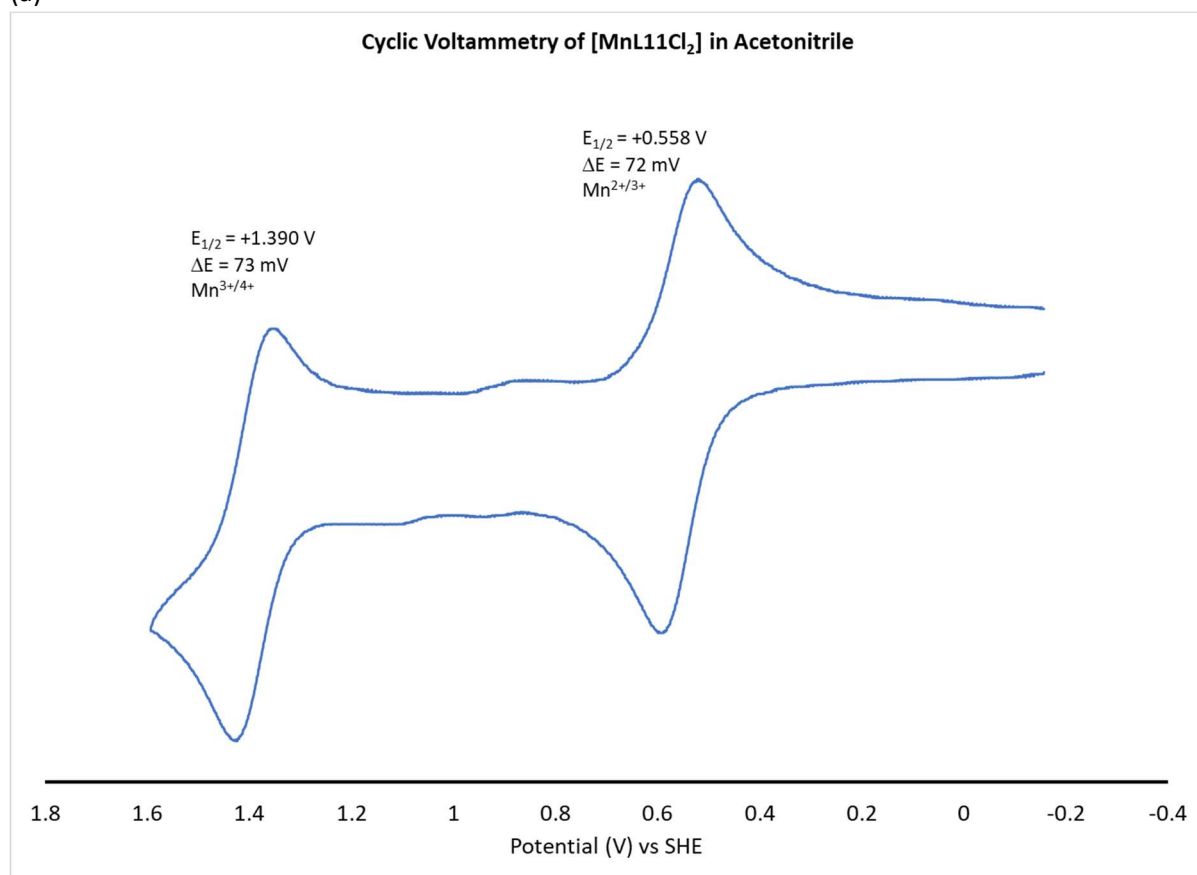

(b)

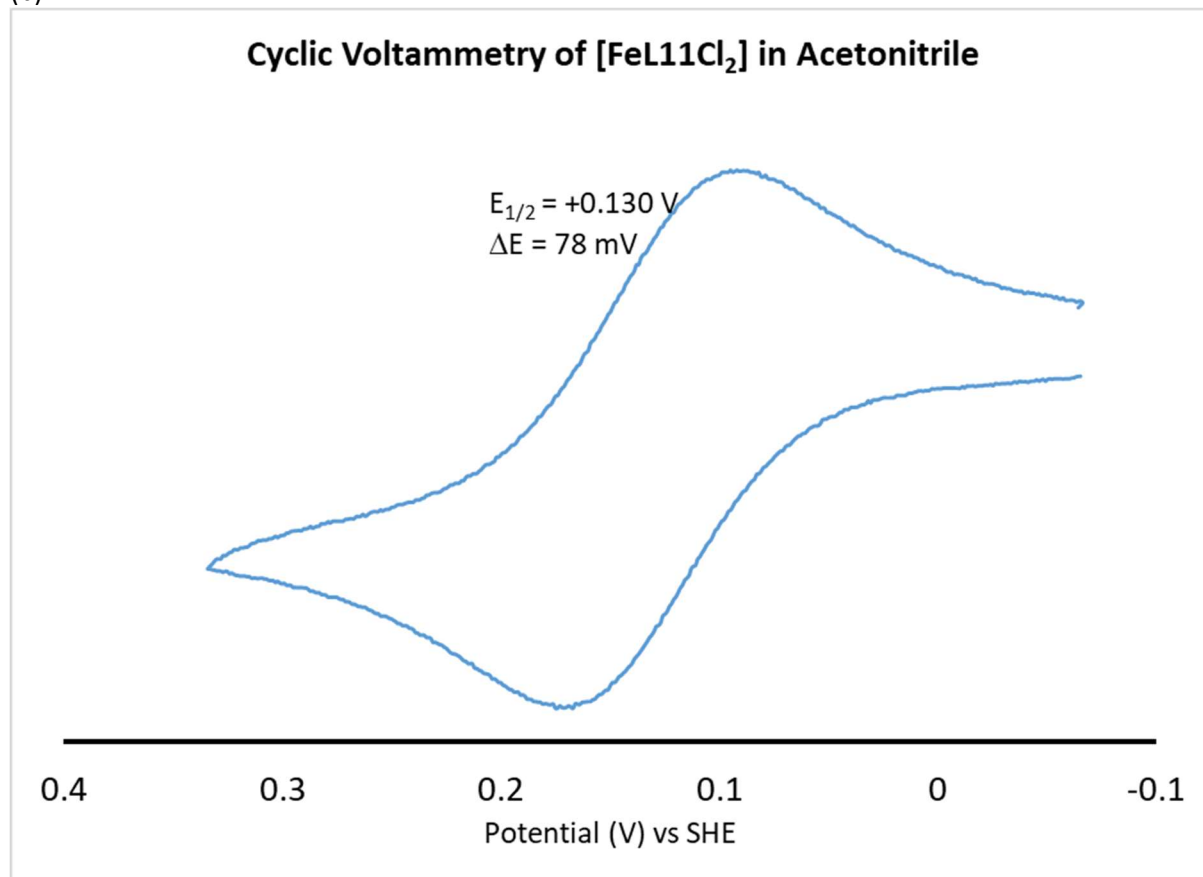

Figure S21. Cyclic Voltammograms in MeCN for (a) MnL12Cl<sub>2</sub> and (b) FeL12Cl<sub>2</sub>.

(a)

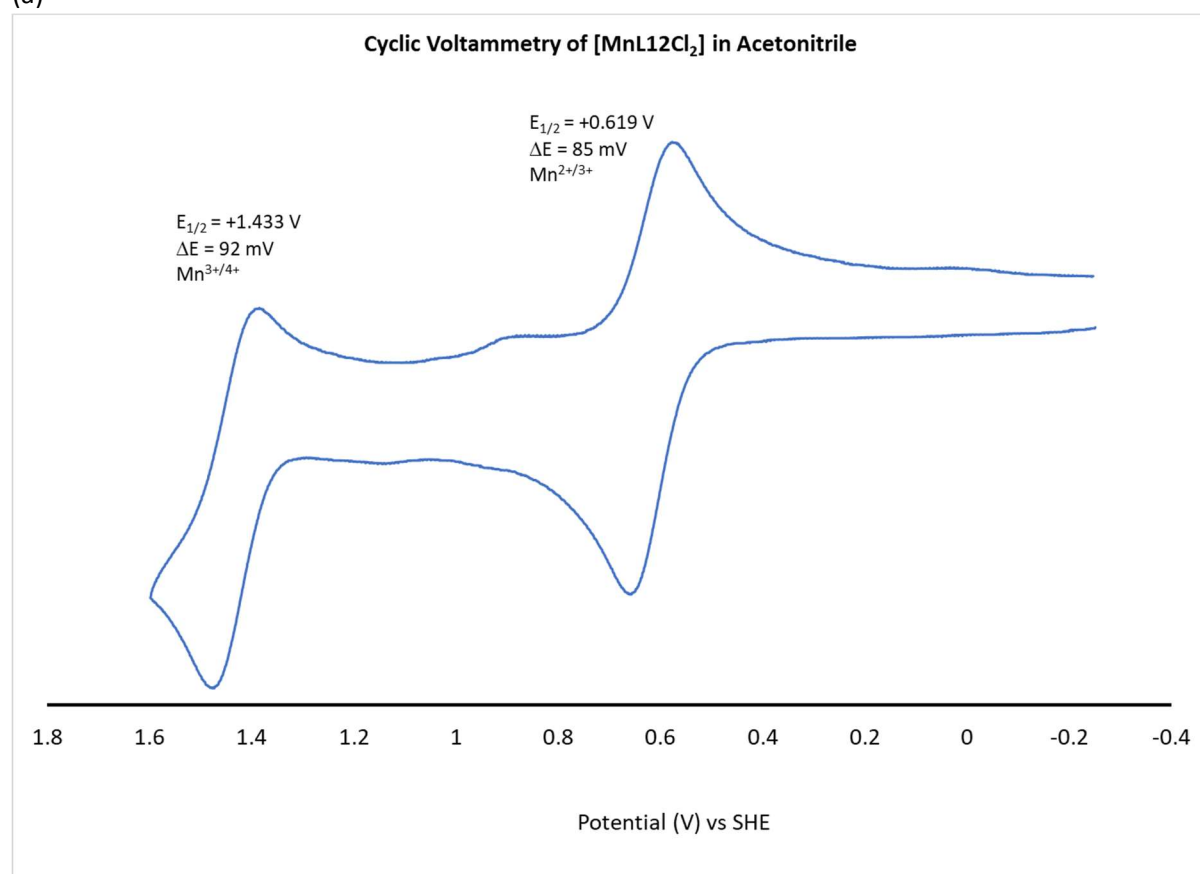

(b)

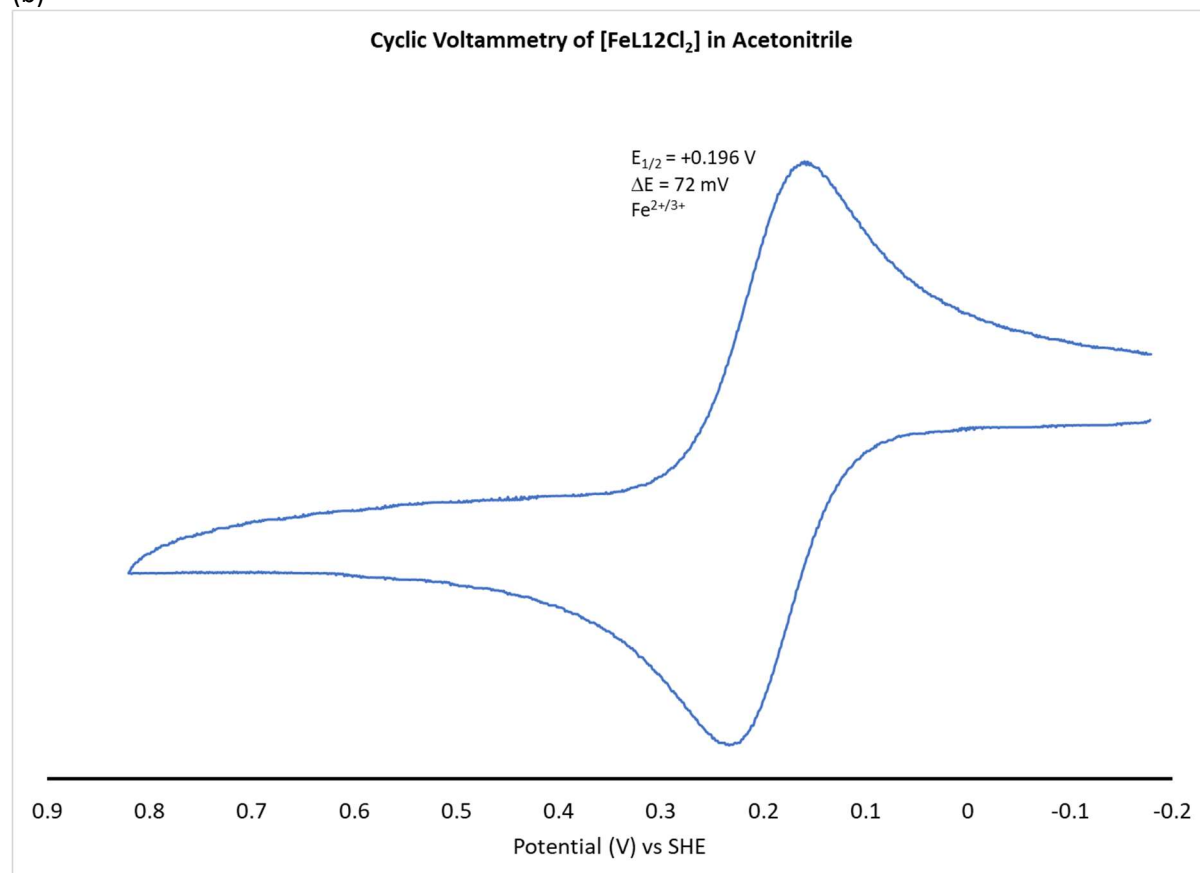

Figure S22. Dye bleaching plots ( $A_t/A_0$  vs time) of Methylene Blue (MB), Methyl Orange (MO), and Rhodamine B (RhB) for catalysts (a) FeL1Cl<sub>2</sub> and (b) MnL1Cl<sub>2</sub>.

(a)

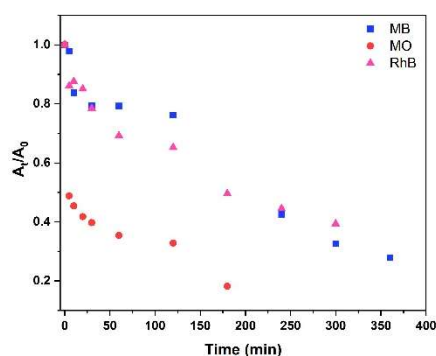

(b)

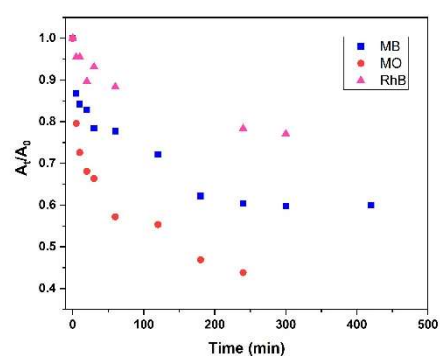

For [FeL1Cl<sub>2</sub>] complex, the dye bleaching was fastest for MO, bleaching of MB and RhB was comparable. The turnover frequency (hr<sup>-1</sup>) (TOF) was less than 1 for MB and RhB, while TOF for MO was close to 1. For [MnL1Cl<sub>2</sub>] complex, the dye bleaching rate was fastest for MO and slowest for RhB. The TOF value was less than 0.5 for MB and RhB, while TOF value was close to 1 for MO. The TOF values of [FeL1Cl<sub>2</sub>] complex was higher than [MnL1Cl<sub>2</sub>] complex for MB and RhB, while the TOF of both of the complexes was comparable for MO.

Figure S23. Dye bleaching plots ( $A_t/A_0$  vs time) of Methylene Blue (MB), Methyl Orange (MO), and Rhodamine B (RhB) for catalysts (a) FeL2Cl<sub>2</sub> and (b) MnL2Cl<sub>2</sub>.

(a)

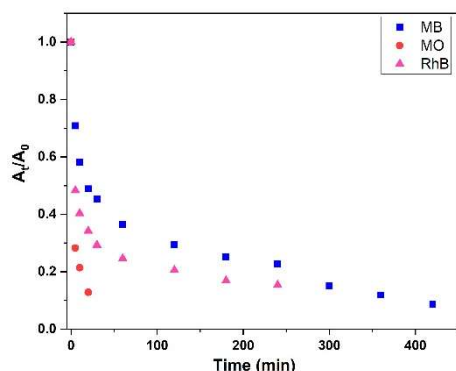

(b)

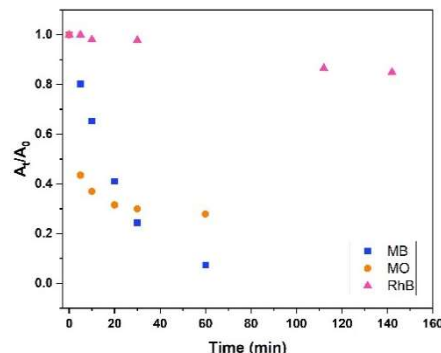

The degradation kinetics are fastest for MO and comparable for MB & RhB using [FeL2Cl<sub>2</sub>] catalyst. However, the degradation rate using [MnL2Cl<sub>2</sub>] catalyst is comparable for MO and MB, and slower for RhB than MO and MB. The TOF values of [FeL2Cl<sub>2</sub>] catalyst for bleaching of MB and RhB is ~1.15 and ~3.62 respectively. In our experience, degradation of complex structured dye RhB has been most challenging leading to a TOF value less than 0.5 for most of our catalysts. [FeL2Cl<sub>2</sub>] is our premium catalyst for degradation of RhB with a very high TOF exceeding 3. Nevertheless, the efficiency of [FeL2Cl<sub>2</sub>] for bleaching of MO was outstanding with a very high TOF value of 31.35. Thus, [FeL2Cl<sub>2</sub>] has turned out to be one of our best catalysts with an extraordinary high TOF value for all three dyes. [MnL2Cl<sub>2</sub>] exhibited a very poor performance in degradation of all three dyes with TOF values less than 0.5.

Figure S24. Dye bleaching plots ( $A_t/A_0$  vs time) of **Methylene Blue (MB)**, **Methyl Orange (MO)**, and **Rhodamine B (RhB)** for catalysts (a)  $\text{FeL3Cl}_2$  and (b)  $\text{MnL3Cl}_2$ .

(a)

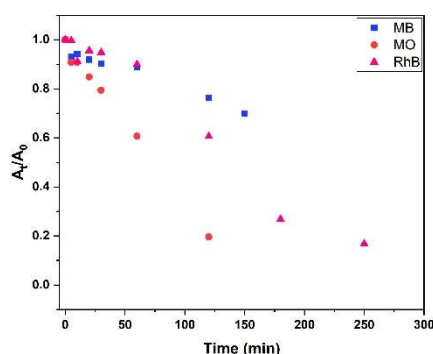

(b)

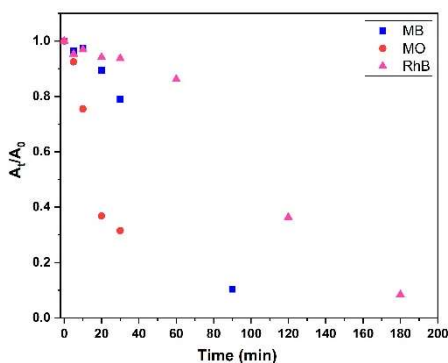

The  $[\text{FeL3Cl}_2]$  complex, degrades MO fastest and MB slowest. In the case of  $[\text{MnL3Cl}_2]$ , bleaching of MO is fastest and bleaching of RhB is slowest. The TOF values of  $[\text{FeL3Cl}_2]$  are less than 1 for bleaching of MB and RhB, and the TOF value is between 1 and 1.5 for MO.  $[\text{MnL3Cl}_2]$  has turned out to be a very efficient catalyst for bleaching of all three dyes. TOF values of  $[\text{MnL3Cl}_2]$  is between 1.3 and 2 for bleaching of MB, between 1 and 1.5 for bleaching of RhB and TOF values for bleaching of MO is between 6.7 and 7.2. Undoubtedly,  $[\text{MnL3Cl}_2]$  works as a better catalyst than the  $[\text{FeL3Cl}_2]$  analogue.

Figure S25. Dye bleaching plots ( $A_t/A_0$  vs time) of **Methylene Blue (MB)**, **Methyl Orange (MO)**, and **Rhodamine B (RhB)** for catalysts (a)  $\text{FeL4Cl}_2$  and (b)  $\text{MnL4Cl}_2$ .

(a)

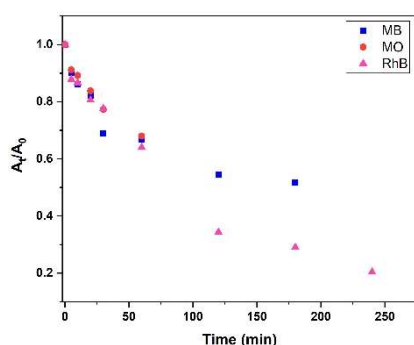

(b)

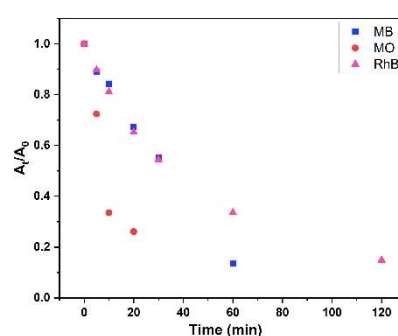

The  $[\text{FeL4Cl}_2]$  complex decomposition rate is nearly equivalent for all three dyes in the beginning, but with increasing time MO degrades completely, degradation of RhB slows down and decomposition of MB saturates. In the case of  $[\text{MnL4Cl}_2]$ , the degradation of MO is fastest, and the decomposition of MB and RhB is comparable until 30 minutes, after which MB decomposes faster than RhB. The TOF value of  $[\text{FeL4Cl}_2]$  for bleaching of MB is less than 0.5 and between 0.5 and 1 for bleaching of RhB; TOF value for bleaching of MO is slightly higher with the value is  $\sim 1.2$ . Although  $[\text{FeL4Cl}_2]$  was not very efficient in bleaching of dyes,  $[\text{MnL4Cl}_2]$  was a competent oxidation catalyst in bleaching of all three dyes. In our experience with the three dyes, bleaching of MO has been the easiest, and bleaching of MB and RhB has been difficult. With most of our catalysts, TOF values for bleaching of MB and RhB were less than 0.5. In the case of  $[\text{MnL4Cl}_2]$ , the average TOF values for bleaching of MB and RhB were calculated to be 2.03 and 1.05 respectively. On the other hand, the efficiency of  $[\text{MnL4Cl}_2]$  in bleaching of MO has been excellent with an average TOF value of 16.26. Therefore,  $[\text{MnL4Cl}_2]$  has been an efficient oxidation catalyst in bleaching of all three dyes, whereas,  $[\text{FeL4Cl}_2]$  has shown poor performance in doing the same.



Figure S26. Dye bleaching plots ( $A_t/A_0$  vs time) of **Methylene Blue (MB)**, **Methyl Orange (MO)**, and **Rhodamine B (RhB)** for catalysts (a)  $\text{FeL5Cl}_2$  and (b)  $\text{MnL5Cl}_2$ .

(a)

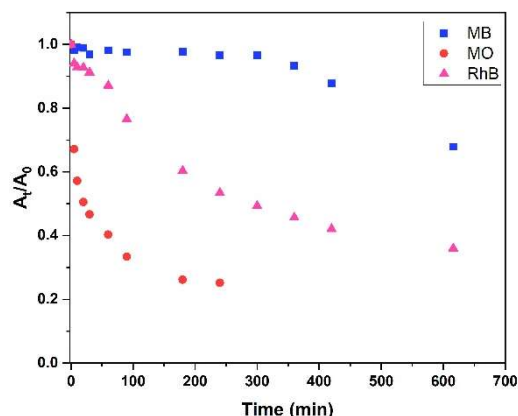

(b)

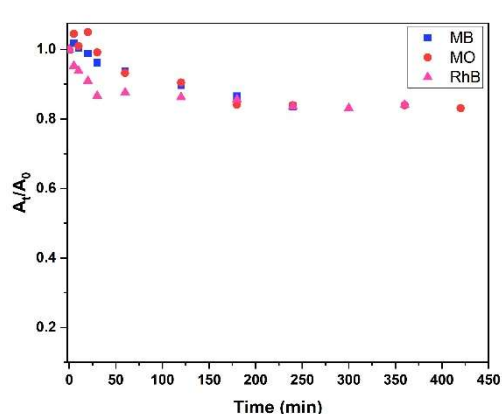

The decomposition rate is fastest for MO and slowest for MB using the  $[\text{FeL5Cl}_2]$  catalysts. The decomposition of dyes is very slow and comparable for all three dyes using  $[\text{MnL5Cl}_2]$  catalyst. The TOF values of  $[\text{FeL5Cl}_2]$  was very low ( $\sim 0.1$  for MB and  $\sim 0.2$  for RhB) for MB and RhB, however, the TOF value for bleaching of MO was appreciable (4.08) using the  $[\text{FeL5Cl}_2]$  catalyst. Degradation of MO is relatively easy owing to its simpler structure compared to the other two dyes. As expected from the figure (b),  $[\text{MnL5Cl}_2]$  exhibited very poor performance in bleaching of all three dyes, the TOF values are  $\sim 0.1$  for MB and RhB, and  $\sim 0.6$  for MO. Thus, neither  $[\text{FeL5Cl}_2]$  nor  $[\text{MnL5Cl}_2]$  turned out to be an efficient catalyst.

Figure S27. Dye bleaching plots ( $A_t/A_0$  vs time) of **Methylene Blue (MB)**, **Methyl Orange (MO)**, and **Rhodamine B (RhB)** for catalysts (a)  $\text{FeL6Cl}_2$  and (b)  $\text{MnL6Cl}_2$ .

(a)

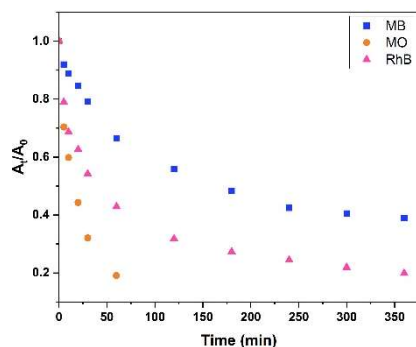

(b)

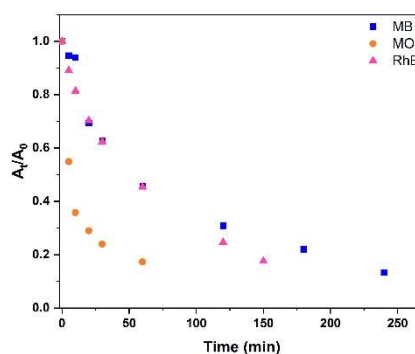

For the  $[\text{FeL6Cl}_2]$  catalyst, decomposition of MO is fastest and MB degrades at the slowest rate. In the case of  $[\text{MnL6Cl}_2]$  catalyst, bleaching of MO was fastest and decomposition rates of MB and RhB were comparable. The average TOF values for bleaching of Mb and RhB were 0.45 and 0.62 using  $[\text{FeL6Cl}_2]$  catalyst, whereas, the average TOF value is 3.41 for bleaching of MO using  $[\text{FeL6Cl}_2]$ . The TOF values suggest that  $[\text{FeL6Cl}_2]$  is medium catalyst for bleaching of dyes. Nevertheless,  $[\text{MnL6Cl}_2]$  turned out to be an excellent catalyst for bleaching of all three dyes. The average TOF values using  $[\text{MnL6Cl}_2]$  catalyst was 0.74 and 1.27 for bleaching of MB and RhB respectively. Since most of our catalysts have exhibited TOF values less than 0.5 for bleaching of MB and RhB,  $[\text{MnL6Cl}_2]$  can be termed an good catalyst for degradation of those two dyes. On the other hand, degradation of MO is relatively easy compared to MB and RhB.  $[\text{MnL6Cl}_2]$  has exhibited superiority in bleaching of MO with a significantly high average TOF value of 16.14.

Figure S28. Dye bleaching plots ( $A_t/A_0$  vs time) of **Methylene Blue (MB)**, **Methyl Orange (MO)**, and **Rhodamine B (RhB)** for catalysts (a)  $\text{FeL7Cl}_2$  and (b)  $\text{MnL7Cl}_2$ .

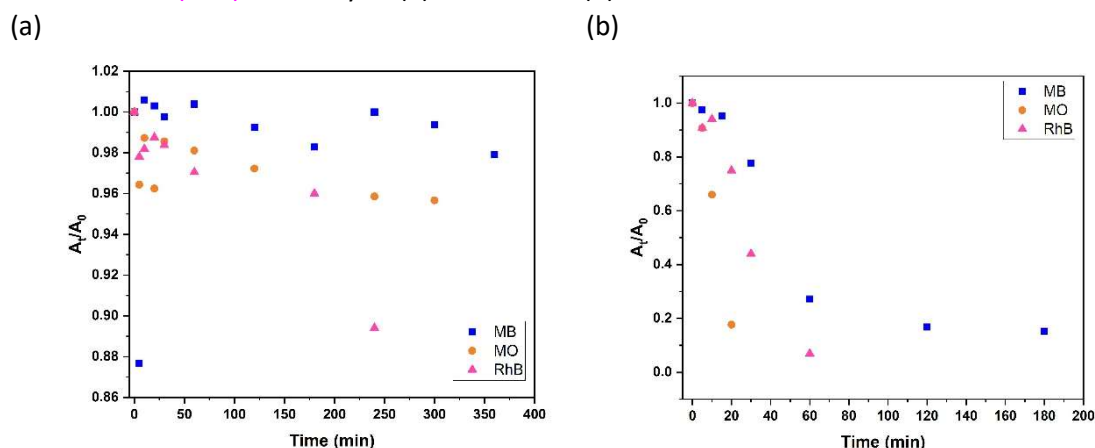

The decomposition rate of all three dyes are slow and comparable for the  $[\text{FeL7Cl}_2]$  catalyst. Similarly, the degradation rate is fast yet analogous for all three dyes using the  $[\text{MnL7Cl}_2]$  catalyst. The TOF values of  $[\text{FeL7Cl}_2]$  catalyst were  $\sim 0.1$  only for all three dyes.  $[\text{MnL7Cl}_2]$  has proved to be an outstanding catalyst for bleaching of dyes. The average TOF value using  $[\text{MnL7Cl}_2]$  for degradation of complex structure MB was 2.64, which is significantly higher than most of our catalysts. Rhodamine B has been most resistant to bleaching so far and it was very hard to achieve TOF value of 1 for RhB decomposition. Surprisingly,  $[\text{MnL7Cl}_2]$  was able to degrade RhB with an average TOF value of 2.34, which is exceptionally high as compared to our other catalysts. Therefore,  $[\text{MnL7Cl}_2]$  is an extraordinary catalyst for decomposition of both MB and RhB within this test group. The average TOF value for bleaching of MO using  $[\text{MnL7Cl}_2]$  is 8.32, which is appreciable, but not the highest.

Figure S29. Dye bleaching plots ( $A_t/A_0$  vs time) of **Methylene Blue (MB)**, **Methyl Orange (MO)**, and **Rhodamine B (RhB)** for catalysts (a)  $\text{FeL8Cl}_2$  and (b)  $\text{MnL8Cl}_2$ .

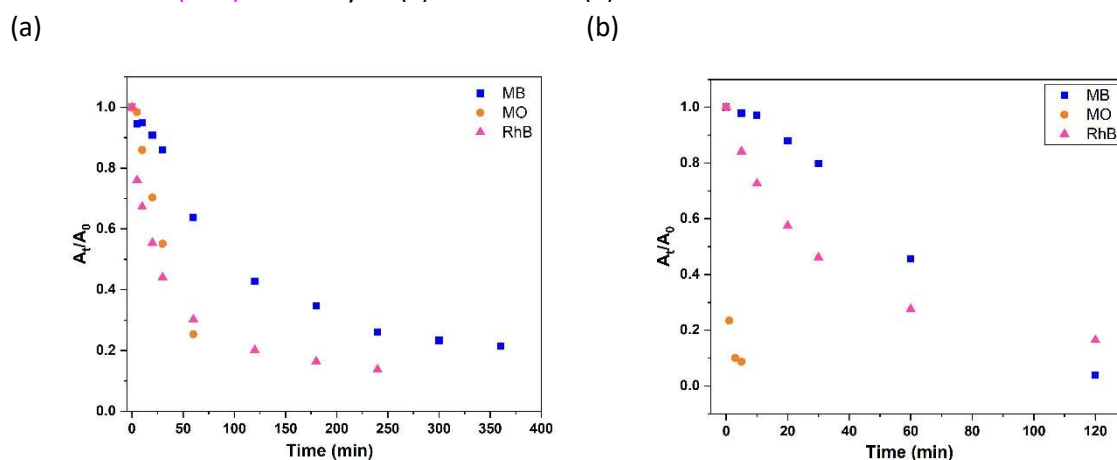

The decomposition rate of MO and RhB is comparable, but the rate of decomposition of RhB is slower for the  $[\text{FeL8Cl}_2]$  catalyst. In the case of  $[\text{MnL8Cl}_2]$ , the decomposition of MO is very fast and the decomposition of MB and RhB are comparable. The average TOF value for bleaching of MB and MO using  $[\text{FeL8Cl}_2]$  are 0.57 and 2.82 respectively, which suggests  $[\text{FeL8Cl}_2]$  is an average catalysts for degradation of MB and MO among this screening set. However, the average TOF value for bleaching of RhB using  $[\text{FeL8Cl}_2]$  is 1.54, which is significantly higher than most other catalysts.  $[\text{MnL8Cl}_2]$  is an exceptional catalyst for bleaching all three dyes. The average TOF value for bleaching of MB using  $[\text{MnL8Cl}_2]$  catalyst is 2.09, which is high for this test group. The performance of  $[\text{MnL8Cl}_2]$  in degrading RhB was also quite appreciable with an average TOF value of 1.46.  $[\text{MnL8Cl}_2]$  is the most efficient catalyst of the set to degrade MO dye with an exceptionally high average TOF value of 108.9.

Figure S30. Dye bleaching plots ( $A_t/A_0$  vs time) of **Methylene Blue (MB)**, **Methyl Orange (MO)**, and **Rhodamine B (RhB)** for catalysts (a)  $\text{FeL9Cl}_2$  and (b)  $\text{MnL9Cl}_2$ .

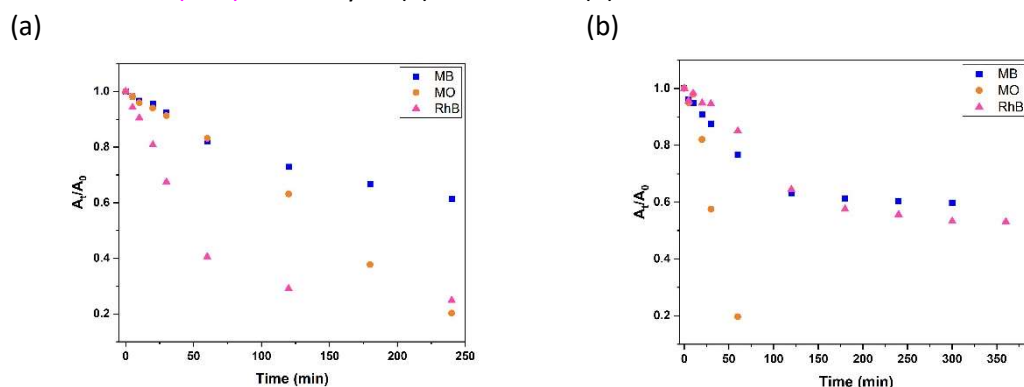

Unlike most of the dyes, the degradation rate of RhB is fastest for the  $[\text{FeL9Cl}_2]$  catalyst. The decomposition rate of MO and MB using the  $[\text{FeL9Cl}_2]$  catalyst are comparable through the first 100 minutes, after which bleaching of MB saturates but MO continues degrading. Degradation of MO is fastest and decomposition rate of MB and RhB is comparable using the  $[\text{MnL9Cl}_2]$  catalyst. The average TOF values of the  $[\text{FeL9Cl}_2]$  catalyst are 0.35, 0.77 and 0.92 for bleaching of MB, MO and RhB respectively. The TOF values suggest that  $[\text{FeL9Cl}_2]$  is an average catalyst for MB degradation. However, the catalytic efficiency of  $[\text{FeL9Cl}_2]$  is appreciable for degradation of the most complex structured dye RhB. On the contrary,  $[\text{FeL9Cl}_2]$  is not efficient in bleaching of the simplest structured dye MO, which is a notable result against the general trend. The average TOF values using  $[\text{MnL9Cl}_2]$  catalyst is 0.53, 3.13 and 0.35 for bleaching of MB, MO and RhB respectively. The TOF values conclude  $[\text{MnL9Cl}_2]$  to be an average catalyst for this set of screened catalysts.

Figure S31. Dye bleaching plots ( $A_t/A_0$  vs time) of **Methylene Blue (MB)**, **Methyl Orange (MO)**, and **Rhodamine B (RhB)** for catalysts (a)  $\text{FeL10Cl}_2$  and (b)  $\text{MnL10Cl}_2$ .

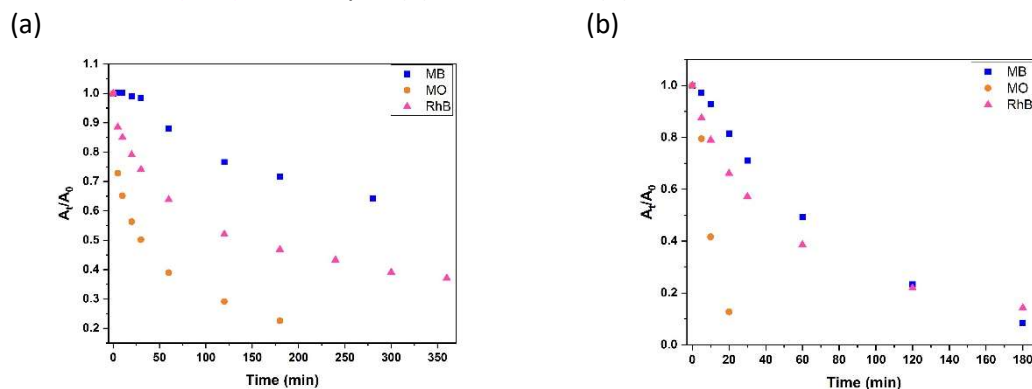

The decomposition rate of MO is fastest and RhB is slowest using the  $[\text{FeL10Cl}_2]$  catalyst. For  $[\text{MnL10Cl}_2]$ , the decomposition rate of MO is fastest, and the degradation rate of MB and RhB are comparable. The average TOF value using  $[\text{FeL10Cl}_2]$  catalyst is 0.171, 2.2, and 0.35 for bleaching of MB, MO and RhB, below average for this screening set. The average TOF values using  $[\text{MnL10Cl}_2]$  catalyst are 1.23 and 1.16 for bleaching of complex structured dyes MB and RhB respectively, which are for this screening set. The average TOF value of the  $[\text{MnL10Cl}_2]$  catalyst for bleaching of MO is 9.40, which suggests that the catalytic efficiency of  $[\text{MnL10Cl}_2]$  is quite high for bleaching of MO.

Figure S32. Dye bleaching plots ( $A_t/A_0$  vs time) of **Methylene Blue (MB)**, **Methyl Orange (MO)**, and **Rhodamine B (RhB)** for catalysts (a) **FeL11Cl<sub>2</sub>** and (b) **MnL11Cl<sub>2</sub>**.

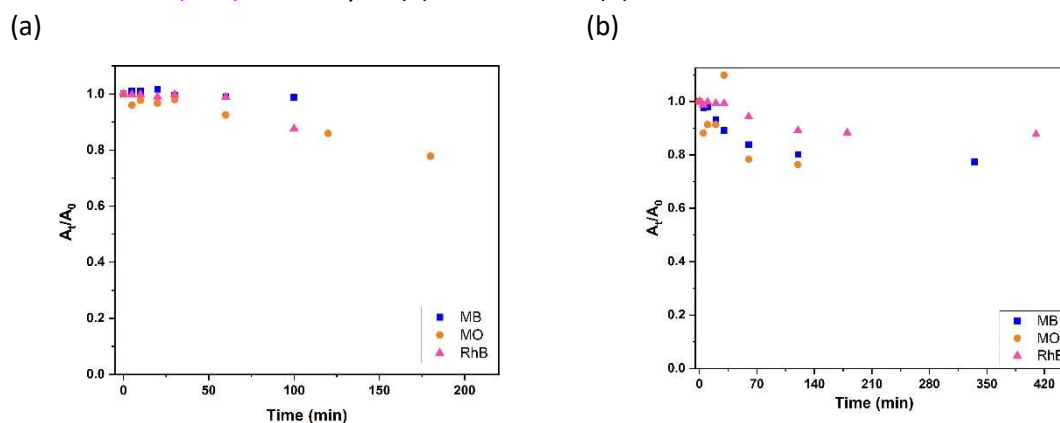

The decomposition rates of dyes using both **[FeL11Cl<sub>2</sub>]** and **[MnL11Cl<sub>2</sub>]** catalysts are very slow and comparable for all three dyes. The average TOF values using the **[FeL11Cl<sub>2</sub>]** catalyst were 0.19, 0.43, and 0.26 for bleaching of MB, MO and RhB respectively. The average TOF values for **[MnL11Cl<sub>2</sub>]** were 0.18, 0.86, and 0.15 for degradation of MB, MO and RhB respectively. The low TOF values determine that both **[FeL11Cl<sub>2</sub>]** and **[MnL11Cl<sub>2</sub>]** are poor catalyst for bleaching all three dyes, compared to this screening set.

Figure S33. Dye bleaching plots ( $A_t/A_0$  vs time) of **Methylene Blue (MB)**, **Methyl Orange (MO)**, and **Rhodamine B (RhB)** for catalysts (a) **FeL12Cl<sub>2</sub>** and (b) **MnL12Cl<sub>2</sub>**.

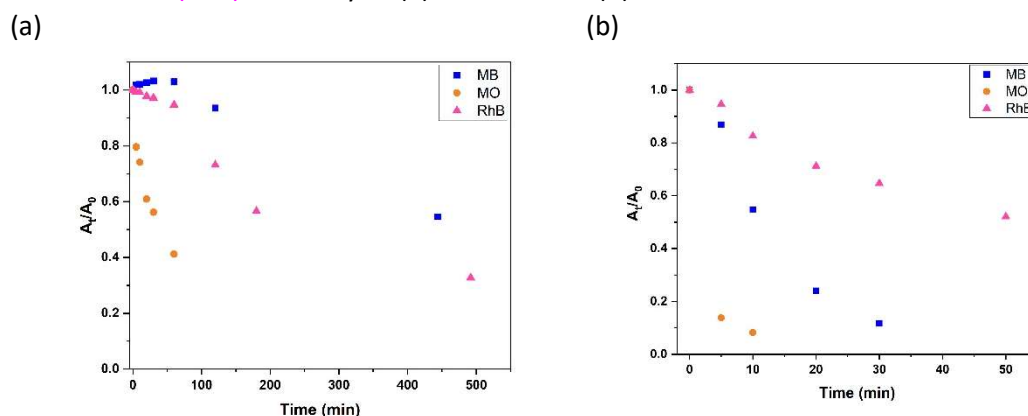

The **[FeL12Cl<sub>2</sub>]** catalyst degrades MO fastest and degrades MB slowest. **[MnL12Cl<sub>2</sub>]** bleaches MO very fast, with bleaching of MB and RhB more slowly. The average TOF values using the **[FeL12Cl<sub>2</sub>]** catalysts were 0.25, 1.26, and 0.70 for bleaching of MB, MO and RhB respectively. The TOF values recommend that **[FeL12Cl<sub>2</sub>]** is an average catalyst for bleaching of dyes. However, the catalytic efficiency of **[MnL12Cl<sub>2</sub>]** was outstanding for bleaching of all three dyes with an average TOF values 5.87, 36.49, 1.61 for MB, MO, and RhB respectively. **[MnL12Cl<sub>2</sub>]** is best catalyst among this screening set for bleaching MB. Remarkably, this catalyst came up with an extraordinarily high TOF value of 5.87, whereas most of our catalysts struggled to reach the TOF value of 1 for bleaching of complex structured dye MB. **[MnL12Cl<sub>2</sub>]** is our second best catalyst for bleaching MO with a significantly high TOF value of 36.49. The catalytic efficiency of **[MnL12Cl<sub>2</sub>]** is also quite impressive for bleaching of the RhB, with a TOF value of 1.61.

# [Mn(L1)Cl<sub>2</sub>]

**Table S1 Crystal data and structure refinement for [Mn(L1)Cl<sub>2</sub>].**

|                                             |                                                                  |
|---------------------------------------------|------------------------------------------------------------------|
| Identification code                         | [Mn(L1)Cl <sub>2</sub> ]                                         |
| Empirical formula                           | C <sub>10</sub> H <sub>22</sub> Cl <sub>2</sub> MnN <sub>4</sub> |
| Formula weight                              | 324.15                                                           |
| Temperature/K                               | 120.02                                                           |
| Crystal system                              | monoclinic                                                       |
| Space group                                 | Cc                                                               |
| a/Å                                         | 12.3081(13)                                                      |
| b/Å                                         | 10.1119(13)                                                      |
| c/Å                                         | 11.2029(12)                                                      |
| α/°                                         | 90                                                               |
| β/°                                         | 96.578(2)                                                        |
| γ/°                                         | 90                                                               |
| Volume/Å <sup>3</sup>                       | 1385.1(3)                                                        |
| Z                                           | 4                                                                |
| ρ <sub>calc</sub> /cm <sup>3</sup>          | 1.554                                                            |
| μ/mm <sup>-1</sup>                          | 1.324                                                            |
| F(000)                                      | 676.0                                                            |
| Crystal size/mm <sup>3</sup>                | 0.355 × 0.247 × 0.142                                            |
| Radiation                                   | MoKα (λ = 0.71073)                                               |
| 2θ range for data collection/°              | 5.228 to 56.576                                                  |
| Index ranges                                | -16 ≤ h ≤ 14, -13 ≤ k ≤ 13, -14 ≤ l ≤ 14                         |
| Reflections collected                       | 13204                                                            |
| Independent reflections                     | 3268 [R <sub>int</sub> = 0.0178, R <sub>sigma</sub> = 0.0211]    |
| Data/restraints/parameters                  | 3268/2/167                                                       |
| Goodness-of-fit on F <sup>2</sup>           | 1.042                                                            |
| Final R indexes [I ≥ 2σ (I)]                | R <sub>1</sub> = 0.0131, wR <sub>2</sub> = 0.0319                |
| Final R indexes [all data]                  | R <sub>1</sub> = 0.0133, wR <sub>2</sub> = 0.0320                |
| Largest diff. peak/hole / e Å <sup>-3</sup> | 0.18/-0.12                                                       |
| Flack parameter                             | 0.077(10)                                                        |

**Table S2 Fractional Atomic Coordinates (×10<sup>4</sup>) and Equivalent Isotropic Displacement Parameters (Å<sup>2</sup>×10<sup>3</sup>) for [Mn(L1)Cl<sub>2</sub>]. U<sub>eq</sub> is defined as 1/3 of the trace of the orthogonalised U<sub>ij</sub> tensor.**

| Atom | x           | y           | z           | U(eq)     |
|------|-------------|-------------|-------------|-----------|
| Mn1  | 4641.7 (2)  | 3794.9 (2)  | 4687.1 (2)  | 10.56 (5) |
| Cl2  | 3087.6 (3)  | 4696.7 (4)  | 3348.5 (3)  | 16.71 (8) |
| Cl1  | 5395.1 (3)  | 5895.3 (4)  | 5408.4 (3)  | 17.78 (8) |
| N2   | 4099.6 (11) | 1608.0 (13) | 4368.5 (11) | 13.0 (2)  |
| N1   | 3906.1 (11) | 3143.5 (14) | 6365.9 (12) | 14.3 (3)  |
| N3   | 5718.5 (11) | 3079.8 (13) | 3275.6 (12) | 14.1 (3)  |
| N4   | 6027.1 (11) | 2485.4 (13) | 5685.9 (11) | 14.1 (3)  |
| C3   | 4139.1 (14) | 1508.0 (15) | 3068.6 (13) | 15.5 (3)  |
| C6   | 6999.8 (13) | 3029.1 (17) | 5217.8 (14) | 17.8 (3)  |
| C4   | 5280.7 (14) | 1805.9 (15) | 2743.7 (13) | 16.2 (3)  |

**Table S2 Fractional Atomic Coordinates ( $\times 10^4$ ) and Equivalent Isotropic Displacement Parameters ( $\text{\AA}^2 \times 10^3$ ) for [Mn(L1)Cl<sub>2</sub>].  $U_{eq}$  is defined as 1/3 of the trace of the orthogonalised  $U_{ij}$  tensor.**

| Atom | x           | y           | z           | U(eq)    |
|------|-------------|-------------|-------------|----------|
| C2   | 2986.1 (13) | 1683.1 (16) | 4719.9 (14) | 15.8 (3) |
| C1   | 2990.4 (14) | 2219.1 (16) | 6010.5 (14) | 16.9 (3) |
| C7   | 5929.1 (14) | 2845.8 (16) | 6941.1 (14) | 16.9 (3) |
| C10  | 4763.9 (14) | 592.3 (15)  | 5056.3 (13) | 15.8 (3) |
| C8   | 4777.0 (14) | 2597.0 (16) | 7264.5 (13) | 17.0 (3) |
| C9   | 5938.7 (15) | 1044.4 (15) | 5473.0 (15) | 16.9 (3) |
| C5   | 6876.9 (14) | 3003.8 (16) | 3830.1 (14) | 17.5 (3) |

**Table S3 Anisotropic Displacement Parameters ( $\text{\AA}^2 \times 10^3$ ) for [Mn(L1)Cl<sub>2</sub>]. The Anisotropic displacement factor exponent takes the form:  $-2\pi^2[h^2a^{*2}U_{11}+2hka^*b^*U_{12}+\dots]$ .**

| Atom | U <sub>11</sub> | U <sub>22</sub> | U <sub>33</sub> | U <sub>23</sub> | U <sub>13</sub> | U <sub>12</sub> |
|------|-----------------|-----------------|-----------------|-----------------|-----------------|-----------------|
| Mn1  | 12.57 (11)      | 9.38 (9)        | 9.53 (10)       | -0.45 (9)       | 0.44 (8)        | -0.73 (9)       |
| Cl2  | 15.77 (18)      | 14.95 (17)      | 18.67 (17)      | 3.03 (13)       | -1.30 (14)      | 1.33 (14)       |
| Cl1  | 22.4 (2)        | 14.16 (17)      | 16.48 (18)      | -3.30 (14)      | 0.89 (15)       | -5.59 (15)      |
| N2   | 16.5 (7)        | 12.0 (6)        | 10.1 (6)        | 0.4 (5)         | 0.2 (5)         | -0.4 (5)        |
| N1   | 16.4 (7)        | 13.9 (6)        | 12.5 (6)        | -1.9 (5)        | 1.1 (5)         | -1.8 (5)        |
| N3   | 18.6 (7)        | 11.8 (6)        | 11.8 (6)        | 1.1 (5)         | 1.9 (5)         | -0.1 (5)        |
| N4   | 16.1 (7)        | 14.5 (6)        | 11.6 (6)        | -0.2 (5)        | 0.9 (5)         | 0.0 (5)         |
| C3   | 23.9 (8)        | 12.4 (7)        | 9.8 (7)         | -2.5 (5)        | 0.0 (6)         | -2.0 (6)        |
| C6   | 14.0 (8)        | 20.8 (8)        | 18.4 (8)        | 1.1 (6)         | 0.4 (6)         | 0.4 (6)         |
| C4   | 24.8 (9)        | 12.6 (7)        | 11.5 (7)        | -2.2 (5)        | 3.6 (6)         | 0.4 (6)         |
| C2   | 17.9 (8)        | 15.8 (7)        | 13.7 (7)        | -1.3 (6)        | 1.6 (6)         | -5.8 (6)        |
| C1   | 17.2 (8)        | 19.3 (8)        | 14.5 (7)        | -1.9 (6)        | 3.9 (6)         | -5.0 (6)        |
| C7   | 19.8 (8)        | 20.1 (7)        | 9.9 (7)         | 0.4 (6)         | -2.6 (6)        | 0.1 (6)         |
| C10  | 23.9 (9)        | 10.3 (7)        | 12.9 (7)        | 1.7 (5)         | 1.3 (6)         | 0.9 (6)         |
| C8   | 24.0 (9)        | 17.8 (7)        | 8.8 (7)         | 0.5 (6)         | 0.7 (6)         | -2.0 (6)        |
| C9   | 23.2 (9)        | 12.8 (7)        | 14.5 (7)        | 2.9 (5)         | 1.0 (7)         | 4.0 (6)         |
| C5   | 16.2 (8)        | 18.7 (8)        | 18.4 (8)        | -0.1 (6)        | 6.0 (6)         | 0.8 (6)         |

**Table S4 Bond Lengths for [Mn(L1)Cl<sub>2</sub>].**

| Atom Atom | Length/ $\text{\AA}$ | Atom Atom | Length/ $\text{\AA}$ |
|-----------|----------------------|-----------|----------------------|
| Mn1 Cl2   | 2.4662 (5)           | N3 C4     | 1.4937 (19)          |
| Mn1 Cl1   | 2.4191 (5)           | N3 C5     | 1.491 (2)            |
| Mn1 N2    | 2.3255 (14)          | N4 C6     | 1.468 (2)            |
| Mn1 N1    | 2.2761 (14)          | N4 C7     | 1.471 (2)            |
| Mn1 N3    | 2.2935 (13)          | N4 C9     | 1.479 (2)            |
| Mn1 N4    | 2.3401 (13)          | C3 C4     | 1.521 (2)            |
| N2 C3     | 1.4661 (19)          | C6 C5     | 1.545 (2)            |
| N2 C2     | 1.471 (2)            | C2 C1     | 1.544 (2)            |
| N2 C10    | 1.4741 (19)          | C7 C8     | 1.524 (2)            |
| N1 C1     | 1.483 (2)            | C10 C9    | 1.537 (2)            |
| N1 C8     | 1.490 (2)            |           |                      |

**Table S 5 Bond Angles for [Mn(L1)Cl2].**

| Atom | Atom | Atom | Angle/°     | Atom | Atom | Atom | Angle/°     |
|------|------|------|-------------|------|------|------|-------------|
| Cl1  | Mn1  | Cl2  | 96.856 (16) | C1   | N1   | C8   | 114.41 (13) |
| N2   | Mn1  | Cl2  | 93.98 (3)   | C8   | N1   | Mn1  | 110.01 (10) |
| N2   | Mn1  | Cl1  | 168.07 (3)  | C4   | N3   | Mn1  | 109.65 (10) |
| N2   | Mn1  | N4   | 73.49 (5)   | C5   | N3   | Mn1  | 109.25 (9)  |
| N1   | Mn1  | Cl2  | 104.79 (4)  | C5   | N3   | C4   | 113.95 (12) |
| N1   | Mn1  | Cl1  | 98.72 (4)   | C6   | N4   | Mn1  | 101.35 (9)  |
| N1   | Mn1  | N2   | 73.58 (5)   | C6   | N4   | C7   | 114.10 (12) |
| N1   | Mn1  | N3   | 142.60 (5)  | C6   | N4   | C9   | 111.07 (13) |
| N1   | Mn1  | N4   | 77.18 (5)   | C7   | N4   | Mn1  | 100.48 (9)  |
| N3   | Mn1  | Cl2  | 99.59 (4)   | C7   | N4   | C9   | 112.70 (12) |
| N3   | Mn1  | Cl1  | 106.11 (4)  | C9   | N4   | Mn1  | 116.38 (10) |
| N3   | Mn1  | N2   | 76.86 (5)   | N2   | C3   | C4   | 111.13 (13) |
| N3   | Mn1  | N4   | 72.80 (5)   | N4   | C6   | C5   | 111.32 (13) |
| N4   | Mn1  | Cl2  | 166.39 (3)  | N3   | C4   | C3   | 112.10 (12) |
| N4   | Mn1  | Cl1  | 96.12 (3)   | N2   | C2   | C1   | 111.45 (13) |
| C3   | N2   | Mn1  | 100.17 (9)  | N1   | C1   | C2   | 113.18 (13) |
| C3   | N2   | C2   | 114.04 (13) | N4   | C7   | C8   | 111.51 (12) |
| C3   | N2   | C10  | 113.06 (12) | N2   | C10  | C9   | 113.43 (13) |
| C2   | N2   | Mn1  | 99.76 (9)   | N1   | C8   | C7   | 113.26 (12) |
| C2   | N2   | C10  | 111.97 (12) | N4   | C9   | C10  | 113.04 (13) |
| C10  | N2   | Mn1  | 116.75 (10) | N3   | C5   | C6   | 113.41 (13) |
| C1   | N1   | Mn1  | 108.82 (9)  |      |      |      |             |

**Table S6 Torsion Angles for [Mn(L1)Cl2].**

| A   | B   | C   | D   | Angle/°     | A   | B  | C   | D   | Angle/°     |
|-----|-----|-----|-----|-------------|-----|----|-----|-----|-------------|
| Mn1 | N2  | C3  | C4  | 59.07 (12)  | C3  | N2 | C10 | C9  | 91.99 (16)  |
| Mn1 | N2  | C2  | C1  | -56.24 (13) | C6  | N4 | C7  | C8  | 163.96 (13) |
| Mn1 | N2  | C10 | C9  | -23.44 (16) | C6  | N4 | C9  | C10 | 138.14 (13) |
| Mn1 | N1  | C1  | C2  | 15.03 (16)  | C4  | N3 | C5  | C6  | 106.89 (15) |
| Mn1 | N1  | C8  | C7  | 10.69 (15)  | C2  | N2 | C3  | C4  | 164.66 (13) |
| Mn1 | N3  | C4  | C3  | 12.60 (14)  | C2  | N2 | C10 | C9  | 137.53 (14) |
| Mn1 | N3  | C5  | C6  | 16.13 (15)  | C1  | N1 | C8  | C7  | 133.52 (14) |
| Mn1 | N4  | C6  | C5  | -54.89 (13) | C7  | N4 | C6  | C5  | 161.92 (13) |
| Mn1 | N4  | C7  | C8  | 56.39 (13)  | C7  | N4 | C9  | C10 | 92.41 (16)  |
| Mn1 | N4  | C9  | C10 | -22.90 (16) | C10 | N2 | C3  | C4  | -65.91 (16) |
| N2  | C3  | C4  | N3  | -51.34 (16) | C10 | N2 | C2  | C1  | 67.95 (16)  |
| N2  | C2  | C1  | N1  | 29.81 (19)  | C8  | N1 | C1  | C2  | 108.45 (16) |
| N2  | C10 | C9  | N4  | 29.92 (19)  | C9  | N4 | C6  | C5  | 69.37 (16)  |
| N4  | C6  | C5  | N3  | 27.75 (18)  | C9  | N4 | C7  | C8  | -68.17 (17) |

**Table S6 Torsion Angles for [Mn(L1)Cl2].**

| A  | B  | C  | D  | Angle/°     | A  | B  | C  | D  | Angle/°     |
|----|----|----|----|-------------|----|----|----|----|-------------|
| N4 | C7 | C8 | N1 | -48.40 (17) | C5 | N3 | C4 | C3 | 135.40 (14) |
| C3 | N2 | C2 | C1 | 162.07 (12) |    |    |    |    |             |

**Table S7 Hydrogen Atom Coordinates ( $\text{\AA} \times 10^4$ ) and Isotropic Displacement Parameters ( $\text{\AA}^2 \times 10^3$ ) for [Mn(L1)Cl2].**

| Atom | x           | y           | z           | U(eq) |
|------|-------------|-------------|-------------|-------|
| H1   | 3630 (6)    | 3858 (16)   | 6688 (7)    | 17    |
| H3   | 5682.6 (14) | 3660 (15)   | 2709 (14)   | 17    |
| H3A  | 3620 (8)    | 2130 (9)    | 2656 (6)    | 19    |
| H3B  | 3926 (4)    | 619 (13)    | 2800 (4)    | 19    |
| H6A  | 7635 (9)    | 2518 (7)    | 5525 (5)    | 21    |
| H6B  | 7113 (2)    | 3930 (13)   | 5494 (4)    | 21    |
| H4A  | 5776 (7)    | 1082 (10)   | 3033 (4)    | 19    |
| H4B  | 5259.1 (14) | 1848.8 (16) | 1864 (12)   | 19    |
| H2A  | 2647 (5)    | 778 (12)    | 4667.7 (16) | 19    |
| H2B  | 2528 (6)    | 2278 (8)    | 4145 (8)    | 19    |
| H1A  | 2289 (10)   | 2681 (7)    | 6075.5 (17) | 20    |
| H1B  | 3039.2 (15) | 1464 (11)   | 6579 (9)    | 20    |
| H7A  | 6112 (3)    | 3784 (14)   | 7064 (2)    | 20    |
| H7B  | 6453 (8)    | 2326 (7)    | 7475 (8)    | 20    |
| H10A | 4791.8 (14) | -209 (11)   | 4550 (7)    | 19    |
| H10B | 4402 (5)    | 345 (4)     | 5772 (10)   | 19    |
| H8A  | 4667 (2)    | 1654 (14)   | 7334.8 (17) | 20    |
| H8B  | 4708.8 (17) | 2990 (6)    | 8040 (11)   | 20    |
| H9A  | 6204 (4)    | 578 (7)     | 6218 (11)   | 20    |
| H9B  | 6412 (7)    | 797 (4)     | 4861 (9)    | 20    |
| H5A  | 7276 (7)    | 3734 (11)   | 3548 (5)    | 21    |
| H5B  | 7198 (5)    | 2204 (13)   | 3570 (4)    | 21    |

### Experimental

Single crystals of  $\text{C}_{10}\text{H}_{22}\text{Cl}_2\text{MnN}_4$  **[[Mn(L1)Cl2]]** were **[[1]]**. A suitable crystal was selected and **[[1]]** on a **Bruker APEX-II** diffractometer. The crystal was kept at 120.02 K during data collection. Using Olex2 [1], the structure was solved with the SHELXT [2] structure solution program using Intrinsic Phasing and refined with the SHELXL [3] refinement package using Least Squares minimisation.

1. Dolomanov, O.V., Bourhis, L.J., Gildea, R.J., Howard, J.A.K. & Puschmann, H. (2009), J. Appl. Cryst. 42, 339-341.
2. Sheldrick, G.M. (2015). Acta Cryst. A71, 3-8.
3. Sheldrick, G.M. (2015). Acta Cryst. C71, 3-8.

### Crystal structure determination of **[[Mn(L1)Cl2]]**

**Crystal Data** for  $\text{C}_{10}\text{H}_{22}\text{Cl}_2\text{MnN}_4$  ( $M=324.15$  g/mol): monoclinic, space group Cc (no. 9),  $a=12.3081(13)$  Å,  $b=10.1119(13)$  Å,  $c=11.2029(12)$  Å,  $\beta=96.578(2)^\circ$ ,  $V=1385.1(3)$  Å<sup>3</sup>,  $Z=4$ ,  $T=120.02$  K,  $\mu(\text{MoK}\alpha)=1.324$  mm<sup>-1</sup>,  $D_{\text{calc}}=1.554$  g/cm<sup>3</sup>, 13204 reflections measured ( $5.228^\circ \leq 2\theta \leq 56.576^\circ$ ), 3268 unique ( $R_{\text{int}}=0.0178$ ,  $R_{\text{sigma}}=0.0211$ ) which were used in all calculations. The final  $R_1$  was 0.0131 ( $I > 2\sigma(I)$ ) and  $wR_2$  was 0.0320 (all data).

### Refinement model description

Number of restraints - 2, number of constraints - unknown.  
Details:



1. Twinned data refinement  
 Scales: 0.923(10)  
 0.077(10)  
 2. Fixed Uiso  
 At 1.2 times of:  
 All C(H,H) groups, All N(H) groups  
 3.a Ternary CH refined with riding coordinates and stretchable bonds:  
 N1(H1), N3(H3)  
 3.b Secondary CH2 refined with riding coordinates and stretchable bonds:  
 C3(H3A,H3B), C6(H6A,H6B), C4(H4A,H4B), C2(H2A,H2B), C1(H1A,H1B), C7(H7A,H7B),  
 C10(H10A,H10B), C8(H8A,H8B), C9(H9A,H9B), C5(H5A,H5B)

This report has been created with Olex2, compiled on 2020.11.12 svn.r5f609507 for OlexSys. Please [let us know](#) if there are any errors or if you would like to have additional features.

# [Mn(L3)Cl<sub>2</sub>]

**Table S8 Crystal data and structure refinement for [Mn(L3)Cl<sub>2</sub>].**

|                                             |                                                                  |
|---------------------------------------------|------------------------------------------------------------------|
| Identification code                         | [Mn(L3)Cl <sub>2</sub> ]                                         |
| Empirical formula                           | C <sub>14</sub> H <sub>28</sub> Cl <sub>2</sub> MnN <sub>4</sub> |
| Formula weight                              | 378.24                                                           |
| Temperature/K                               | 120.0                                                            |
| Crystal system                              | orthorhombic                                                     |
| Space group                                 | P2 <sub>1</sub> 2 <sub>1</sub> 2 <sub>1</sub>                    |
| a/Å                                         | 7.6390(4)                                                        |
| b/Å                                         | 12.0399(6)                                                       |
| c/Å                                         | 18.6843(10)                                                      |
| α/°                                         | 90                                                               |
| β/°                                         | 90                                                               |
| γ/°                                         | 90                                                               |
| Volume/Å <sup>3</sup>                       | 1718.45(15)                                                      |
| Z                                           | 4                                                                |
| ρ <sub>calc</sub> /g/cm <sup>3</sup>        | 1.462                                                            |
| μ/mm <sup>-1</sup>                          | 1.078                                                            |
| F(000)                                      | 796.0                                                            |
| Crystal size/mm <sup>3</sup>                | 0.213 × 0.15 × 0.078                                             |
| Radiation                                   | MoKα (λ = 0.71073)                                               |
| 2θ range for data collection/°              | 4.024 to 56.618                                                  |
| Index ranges                                | -10 ≤ h ≤ 10, -16 ≤ k ≤ 16, -24 ≤ l ≤ 24                         |
| Reflections collected                       | 31559                                                            |
| Independent reflections                     | 4259 [R <sub>int</sub> = 0.0520, R <sub>sigma</sub> = 0.0334]    |
| Data/restraints/parameters                  | 4259/0/192                                                       |
| Goodness-of-fit on F <sup>2</sup>           | 1.180                                                            |
| Final R indexes [I ≥ 2σ (I)]                | R <sub>1</sub> = 0.0400, wR <sub>2</sub> = 0.0740                |
| Final R indexes [all data]                  | R <sub>1</sub> = 0.0445, wR <sub>2</sub> = 0.0751                |
| Largest diff. peak/hole / e Å <sup>-3</sup> | 0.37/-0.52                                                       |
| Flack parameter                             | 0.32(3)                                                          |

**Table S9 Fractional Atomic Coordinates ( $\times 10^4$ ) and Equivalent Isotropic Displacement Parameters ( $\text{\AA}^2 \times 10^3$ ) for  $[\text{Mn}(\text{L3})\text{Cl}_2]$ .  $U_{\text{eq}}$  is defined as 1/3 of the trace of the orthogonalised  $U_{ij}$  tensor.**

| Atom | x           | y          | z           | $U(\text{eq})$ |
|------|-------------|------------|-------------|----------------|
| Mn1  | 6086.4 (6)  | 4980.8 (5) | 3785.8 (2)  | 9.24 (11)      |
| Cl1  | 4011.2 (13) | 3448.4 (7) | 3963.8 (5)  | 16.28 (19)     |
| Cl2  | 4114.4 (14) | 6443.6 (8) | 4170.3 (5)  | 20.6 (2)       |
| N2   | 8383 (4)    | 6164 (3)   | 3551.7 (17) | 13.4 (7)       |
| N1   | 6014 (4)    | 5155 (2)   | 2511.1 (14) | 11.3 (6)       |
| N4   | 8286 (4)    | 3859 (2)   | 3335.3 (16) | 10.0 (6)       |
| N3   | 7985 (4)    | 4826 (3)   | 4744.7 (15) | 14.2 (7)       |
| C6   | 8662 (5)    | 3175 (3)   | 3972 (2)    | 15.3 (8)       |
| C7   | 7362 (5)    | 3272 (3)   | 2759 (2)    | 13.1 (8)       |
| C10  | 9862 (5)    | 4435 (3)   | 3063 (2)    | 14.7 (8)       |
| C11  | 4138 (5)    | 5357 (3)   | 2332.7 (19) | 14.5 (7)       |
| C2   | 7610 (5)    | 6838 (3)   | 2978 (2)    | 15.5 (8)       |
| C8   | 6642 (5)    | 4088 (3)   | 2195 (2)    | 13.7 (8)       |
| C1   | 7145 (5)    | 6132 (3)   | 2330 (2)    | 14.3 (8)       |
| C5   | 9255 (5)    | 3907 (3)   | 4590 (2)    | 16.7 (8)       |
| C12  | 3720 (5)    | 5496 (3)   | 1549 (2)    | 16.6 (7)       |
| C4   | 8871 (6)    | 5923 (3)   | 4854 (2)    | 21.2 (8)       |
| C3   | 8557 (5)    | 6751 (3)   | 4239 (2)    | 16.7 (8)       |
| C9   | 10057 (5)   | 5639 (3)   | 3335 (2)    | 15.0 (8)       |
| C13  | 2575 (5)    | 4883 (4)   | 1202 (2)    | 23.0 (8)       |
| C14  | 6892 (6)    | 4530 (4)   | 5370 (2)    | 24.1 (9)       |

**Table S10 Anisotropic Displacement Parameters ( $\text{\AA}^2 \times 10^3$ ) for  $[\text{Mn}(\text{L3})\text{Cl}_2]$ . The Anisotropic displacement factor exponent takes the form:  $-2\pi^2[h^2a^{*2}U_{11}+2hka^*b^*U_{12}+\dots]$ .**

| Atom | $U_{11}$  | $U_{22}$  | $U_{33}$  | $U_{23}$  | $U_{13}$  | $U_{12}$  |
|------|-----------|-----------|-----------|-----------|-----------|-----------|
| Mn1  | 9.2 (2)   | 9.5 (2)   | 9.0 (2)   | -0.9 (2)  | 0.1 (2)   | -0.1 (3)  |
| Cl1  | 13.1 (4)  | 15.4 (4)  | 20.3 (4)  | 1.8 (3)   | 0.9 (4)   | -4.2 (4)  |
| Cl2  | 15.1 (4)  | 19.9 (5)  | 26.9 (5)  | -10.4 (4) | -1.2 (4)  | 4.9 (4)   |
| N2   | 15.3 (16) | 9.1 (14)  | 15.7 (16) | 1.2 (12)  | -4.6 (12) | 0.4 (12)  |
| N1   | 12.4 (12) | 8.7 (14)  | 12.6 (13) | -0.6 (11) | -1.8 (12) | 1.0 (13)  |
| N4   | 10.2 (15) | 8.4 (14)  | 11.6 (15) | -0.6 (12) | 0.5 (11)  | 2.8 (11)  |
| N3   | 14.9 (13) | 16.2 (18) | 11.4 (14) | -0.1 (12) | 0.2 (11)  | -1.1 (13) |
| C6   | 14.3 (18) | 11.7 (17) | 20.0 (19) | 3.8 (14)  | 0.6 (15)  | 4.6 (14)  |
| C7   | 13.5 (17) | 11.0 (18) | 14.8 (18) | -3.7 (14) | 2.3 (14)  | 0.8 (14)  |
| C10  | 10.8 (17) | 18.4 (19) | 15.0 (19) | -0.3 (15) | 3.3 (15)  | 2.5 (15)  |
| C11  | 12.7 (16) | 16.5 (16) | 14.2 (16) | 1.0 (13)  | 1.4 (15)  | 2.1 (13)  |
| C2   | 16.1 (18) | 9.1 (18)  | 21 (2)    | 2.8 (15)  | -1.7 (15) | -1.6 (14) |
| C8   | 14.1 (18) | 13.1 (18) | 14.0 (18) | -2.3 (14) | 1.1 (14)  | 0.6 (14)  |
| C1   | 15.2 (18) | 12.2 (18) | 15.4 (18) | 4.6 (15)  | 1.0 (15)  | -1.8 (14) |
| C5   | 15.2 (19) | 17.9 (18) | 17.1 (18) | 4.2 (15)  | -1.7 (15) | -0.6 (15) |
| C12  | 12.3 (17) | 19.6 (17) | 17.8 (18) | 3.4 (15)  | 0.9 (15)  | 5.3 (15)  |
| C4   | 23 (2)    | 18.4 (18) | 22.0 (19) | -5.9 (15) | -9.9 (19) | -0.5 (17) |
| C3   | 16.8 (19) | 12.2 (17) | 21.2 (19) | -4.7 (15) | -5.7 (16) | -6.6 (14) |

**Table S10 Anisotropic Displacement Parameters ( $\text{\AA}^2 \times 10^3$ ) for  $[\text{Mn}(\text{L3})\text{Cl}_2]$ . The Anisotropic displacement factor exponent takes the form:  $-2\pi^2[h^2a^{*2}U_{11}+2hka^*b^*U_{12}+\dots]$ .**

| Atom | $U_{11}$  | $U_{22}$  | $U_{33}$  | $U_{23}$ | $U_{13}$  | $U_{12}$  |
|------|-----------|-----------|-----------|----------|-----------|-----------|
| C9   | 9.5 (17)  | 16.5 (19) | 19 (2)    | 2.9 (16) | 0.2 (15)  | -2.6 (15) |
| C13  | 20.4 (16) | 30 (2)    | 18.6 (18) | -2 (2)   | -0.6 (15) | 0.4 (18)  |
| C14  | 26 (2)    | 33 (2)    | 13.2 (19) | 2.4 (17) | 3.6 (17)  | -2.7 (18) |

**Table S11 Bond Lengths for  $[\text{Mn}(\text{L3})\text{Cl}_2]$ .**

| Atom | Atom | Length/ $\text{\AA}$ | Atom | Atom | Length/ $\text{\AA}$ |
|------|------|----------------------|------|------|----------------------|
| Mn1  | Cl1  | 2.4552 (11)          | N4   | C7   | 1.469 (5)            |
| Mn1  | Cl2  | 2.4264 (11)          | N4   | C10  | 1.480 (5)            |
| Mn1  | N2   | 2.302 (3)            | N3   | C5   | 1.500 (5)            |
| Mn1  | N1   | 2.392 (3)            | N3   | C4   | 1.498 (5)            |
| Mn1  | N4   | 2.314 (3)            | N3   | C14  | 1.479 (5)            |
| Mn1  | N3   | 2.313 (3)            | C6   | C5   | 1.521 (5)            |
| N2   | C2   | 1.469 (5)            | C7   | C8   | 1.543 (5)            |
| N2   | C3   | 1.472 (5)            | C10  | C9   | 1.544 (5)            |
| N2   | C9   | 1.482 (5)            | C11  | C12  | 1.507 (5)            |
| N1   | C11  | 1.491 (4)            | C2   | C1   | 1.521 (5)            |
| N1   | C8   | 1.493 (4)            | C12  | C13  | 1.316 (5)            |
| N1   | C1   | 1.499 (4)            | C4   | C3   | 1.541 (5)            |
| N4   | C6   | 1.476 (5)            |      |      |                      |

**Table S12 Bond Angles for  $[\text{Mn}(\text{L3})\text{Cl}_2]$ .**

| Atom | Atom | Atom | Angle/ $^\circ$ | Atom | Atom | Atom | Angle/ $^\circ$ |
|------|------|------|-----------------|------|------|------|-----------------|
| Cl2  | Mn1  | Cl1  | 96.00 (3)       | C1   | N1   | Mn1  | 106.3 (2)       |
| N2   | Mn1  | Cl1  | 169.38 (9)      | C6   | N4   | Mn1  | 100.0 (2)       |
| N2   | Mn1  | Cl2  | 94.62 (9)       | C6   | N4   | C10  | 112.4 (3)       |
| N2   | Mn1  | N1   | 76.95 (10)      | C7   | N4   | Mn1  | 101.5 (2)       |
| N2   | Mn1  | N4   | 74.85 (10)      | C7   | N4   | C6   | 114.6 (3)       |
| N2   | Mn1  | N3   | 73.68 (11)      | C7   | N4   | C10  | 111.3 (3)       |
| N1   | Mn1  | Cl1  | 100.71 (7)      | C10  | N4   | Mn1  | 116.2 (2)       |
| N1   | Mn1  | Cl2  | 102.52 (7)      | C5   | N3   | Mn1  | 108.4 (2)       |
| N4   | Mn1  | Cl1  | 94.55 (8)       | C4   | N3   | Mn1  | 108.5 (2)       |
| N4   | Mn1  | Cl2  | 169.14 (8)      | C4   | N3   | C5   | 112.6 (3)       |
| N4   | Mn1  | N1   | 72.90 (10)      | C14  | N3   | Mn1  | 106.1 (2)       |
| N3   | Mn1  | Cl1  | 103.86 (8)      | C14  | N3   | C5   | 109.9 (3)       |
| N3   | Mn1  | Cl2  | 102.62 (8)      | C14  | N3   | C4   | 111.1 (3)       |
| N3   | Mn1  | N1   | 142.48 (10)     | N4   | C6   | C5   | 110.2 (3)       |
| N3   | Mn1  | N4   | 77.26 (11)      | N4   | C7   | C8   | 111.4 (3)       |
| C2   | N2   | Mn1  | 100.0 (2)       | N4   | C10  | C9   | 113.9 (3)       |
| C2   | N2   | C3   | 114.0 (3)       | N1   | C11  | C12  | 116.0 (3)       |
| C2   | N2   | C9   | 112.5 (3)       | N2   | C2   | C1   | 111.5 (3)       |
| C3   | N2   | Mn1  | 101.6 (2)       | N1   | C8   | C7   | 113.1 (3)       |
| C3   | N2   | C9   | 111.4 (3)       | N1   | C1   | C2   | 113.1 (3)       |

**Table S12 Bond Angles for [Mn(L3)Cl2].**

| Atom | Atom | Atom | Angle/°     | Atom | Atom | Atom | Angle/°   |
|------|------|------|-------------|------|------|------|-----------|
| C9   | N2   | Mn1  | 116.5 (2)   | N3   | C5   | C6   | 112.4 (3) |
| C11  | N1   | Mn1  | 105.02 (19) | C13  | C12  | C11  | 123.9 (4) |
| C11  | N1   | C8   | 111.2 (3)   | N3   | C4   | C3   | 113.5 (3) |
| C11  | N1   | C1   | 112.1 (3)   | N2   | C3   | C4   | 110.7 (3) |
| C8   | N1   | Mn1  | 108.1 (2)   | N2   | C9   | C10  | 114.0 (3) |
| C8   | N1   | C1   | 113.6 (3)   |      |      |      |           |

**Table S13 Torsion Angles for [Mn(L3)Cl2].**

| A   | B   | C   | D   | Angle/°    | A   | B  | C   | D   | Angle/°    |
|-----|-----|-----|-----|------------|-----|----|-----|-----|------------|
| Mn1 | N2  | C2  | C1  | -61.6 (3)  | C7  | N4 | C10 | C9  | 134.1 (3)  |
| Mn1 | N2  | C3  | C4  | 57.3 (3)   | C10 | N4 | C6  | C5  | 63.7 (4)   |
| Mn1 | N2  | C9  | C10 | 18.9 (4)   | C10 | N4 | C7  | C8  | -64.2 (4)  |
| Mn1 | N1  | C11 | C12 | -179.8 (2) | C11 | N1 | C8  | C7  | -122.2 (3) |
| Mn1 | N1  | C8  | C7  | -7.4 (3)   | C11 | N1 | C1  | C2  | 101.0 (3)  |
| Mn1 | N1  | C1  | C2  | -13.2 (3)  | C2  | N2 | C3  | C4  | 163.9 (3)  |
| Mn1 | N4  | C6  | C5  | -60.3 (3)  | C2  | N2 | C9  | C10 | -95.7 (4)  |
| Mn1 | N4  | C7  | C8  | 60.1 (3)   | C8  | N1 | C11 | C12 | -63.1 (4)  |
| Mn1 | N4  | C10 | C9  | 18.6 (4)   | C8  | N1 | C1  | C2  | -132.0 (3) |
| Mn1 | N3  | C5  | C6  | -14.8 (3)  | C1  | N1 | C11 | C12 | 65.2 (4)   |
| Mn1 | N3  | C4  | C3  | -10.6 (4)  | C1  | N1 | C8  | C7  | 110.3 (3)  |
| N2  | C2  | C1  | N1  | 53.4 (4)   | C5  | N3 | C4  | C3  | 109.4 (4)  |
| N1  | C11 | C12 | C13 | 123.7 (4)  | C4  | N3 | C5  | C6  | -134.9 (3) |
| N4  | C6  | C5  | N3  | 53.7 (4)   | C3  | N2 | C2  | C1  | -169.2 (3) |
| N4  | C7  | C8  | N1  | -36.0 (4)  | C3  | N2 | C9  | C10 | 134.8 (3)  |
| N4  | C10 | C9  | N2  | -24.3 (4)  | C9  | N2 | C2  | C1  | 62.7 (4)   |
| N3  | C4  | C3  | N2  | -32.4 (5)  | C9  | N2 | C3  | C4  | -67.4 (4)  |
| C6  | N4  | C7  | C8  | 166.8 (3)  | C14 | N3 | C5  | C6  | 100.7 (4)  |
| C6  | N4  | C10 | C9  | -95.8 (4)  | C14 | N3 | C4  | C3  | -126.9 (4) |
| C7  | N4  | C6  | C5  | -167.9 (3) |     |    |     |     |            |

**Table S14 Hydrogen Atom Coordinates ( $\text{\AA} \times 10^4$ ) and Isotropic Displacement Parameters ( $\text{\AA}^2 \times 10^3$ ) for [Mn(L3)Cl2].**

| Atom | x        | y       | z       | U(eq) |
|------|----------|---------|---------|-------|
| H6A  | 9589.32  | 2628.63 | 3857.79 | 18    |
| H6B  | 7596.42  | 2760.35 | 4113.1  | 18    |
| H7A  | 6381.19  | 2839.51 | 2964.84 | 16    |
| H7B  | 8174.47  | 2743.7  | 2525.01 | 16    |
| H10A | 9817.28  | 4444.48 | 2533.03 | 18    |
| H10B | 10911.29 | 4006.9  | 3205.53 | 18    |
| H11A | 3750.24  | 6034.08 | 2588.3  | 17    |
| H11B | 3440.05  | 4727.76 | 2519.73 | 17    |
| H2A  | 8449.96  | 7422.66 | 2833.51 | 19    |
| H2B  | 6540.33  | 7207.96 | 3159.2  | 19    |

**Table S14 Hydrogen Atom Coordinates ( $\text{\AA} \times 10^4$ ) and Isotropic Displacement Parameters ( $\text{\AA}^2 \times 10^3$ ) for  $[\text{Mn}(\text{L3})\text{Cl}_2]$ .**

| Atom | x        | y       | z       | U(eq) |
|------|----------|---------|---------|-------|
| H8A  | 7574.64  | 4250.99 | 1841.75 | 16    |
| H8B  | 5662.5   | 3729.92 | 1936.06 | 16    |
| H1A  | 6528.57  | 6601.7  | 1975.25 | 17    |
| H1B  | 8238.84  | 5862.27 | 2104.82 | 17    |
| H5A  | 9396.54  | 3444.65 | 5023.94 | 20    |
| H5B  | 10410.36 | 4232.78 | 4472.66 | 20    |
| H12  | 4320.06  | 6059.31 | 1291.38 | 20    |
| H4A  | 10145.67 | 5797.5  | 4905.05 | 25    |
| H4B  | 8443     | 6254.9  | 5306.1  | 25    |
| H3A  | 7478.15  | 7181.93 | 4334.66 | 20    |
| H3B  | 9549.08  | 7279.17 | 4212.57 | 20    |
| H9A  | 10863.8  | 5642.14 | 3749.38 | 18    |
| H9B  | 10597.05 | 6093.52 | 2952.36 | 18    |
| H13A | 1954.09  | 4313.51 | 1445.12 | 28    |
| H13B | 2368.13  | 5011.2  | 707.03  | 28    |
| H14A | 6000.82  | 5104.04 | 5443.72 | 36    |
| H14B | 7631.86  | 4474.93 | 5796.69 | 36    |
| H14C | 6318.73  | 3814.2  | 5282.78 | 36    |

### Experimental

Single crystals of  $\text{C}_{14}\text{H}_{28}\text{Cl}_2\text{MnN}_4$   $[[\text{Mn}(\text{L3})\text{Cl}_2]]$  were  $[[\text{Mn}(\text{L3})\text{Cl}_2]]$ . A suitable crystal was selected and  $[[\text{Mn}(\text{L3})\text{Cl}_2]]$  on a **Bruker PHOTON-II** diffractometer. The crystal was kept at 120.0 K during data collection. Using Olex2 [1], the structure was solved with the SHELXT [2] structure solution program using Intrinsic Phasing and refined with the SHELXL [3] refinement package using Least Squares minimisation.

1. Dolomanov, O.V., Bourhis, L.J., Gildea, R.J., Howard, J.A.K. & Puschmann, H. (2009), J. Appl. Cryst. 42, 339-341.
2. Sheldrick, G.M. (2015). Acta Cryst. A71, 3-8.
3. Sheldrick, G.M. (2015). Acta Cryst. C71, 3-8.

### Crystal structure determination of $[[\text{Mn}(\text{L3})\text{Cl}_2]]$

**Crystal Data** for  $\text{C}_{14}\text{H}_{28}\text{Cl}_2\text{MnN}_4$  ( $M = 378.24$  g/mol): orthorhombic, space group  $P2_12_12_1$  (no. 19),  $a = 7.6390(4)$   $\text{\AA}$ ,  $b = 12.0399(6)$   $\text{\AA}$ ,  $c = 18.6843(10)$   $\text{\AA}$ ,  $V = 1718.45(15)$   $\text{\AA}^3$ ,  $Z = 4$ ,  $T = 120.0$  K,  $\mu(\text{MoK}\alpha) = 1.078$   $\text{mm}^{-1}$ ,  $D_{\text{calc}} = 1.462$   $\text{g/cm}^3$ , 31559 reflections measured ( $4.024^\circ \leq 2\theta \leq 56.618^\circ$ ), 4259 unique ( $R_{\text{int}} = 0.0520$ ,  $R_{\text{sigma}} = 0.0334$ ) which were used in all calculations. The final  $R_1$  was 0.0400 ( $I > 2\sigma(I)$ ) and  $wR_2$  was 0.0751 (all data).

### Refinement model description

Number of restraints - 0, number of constraints - unknown.

#### Details:

1. Twinned data refinement  
Scales: 0.68(3)  
0.32(3)
2. Fixed Uiso  
At 1.2 times of:  
All C(H) groups, All C(H,H) groups  
At 1.5 times of:  
All C(H,H,H) groups
- 3.a Secondary CH2 refined with riding coordinates:  
C6(H6A,H6B), C7(H7A,H7B), C10(H10A,H10B), C11(H11A,H11B), C2(H2A,H2B), C8(H8A,H8B), C1(H1A,H1B), C5(H5A,H5B), C4(H4A,H4B), C3(H3A,H3B), C9(H9A,H9B)
- 3.b Aromatic/amide H refined with riding coordinates:  
C12(H12)
- 3.c X=CH2 refined with riding coordinates:  
C13(H13A,H13B)

3.d Idealised Me refined as rotating group:  
C14 (H14A, H14B, H14C)

This report has been created with Olex2, compiled on 2020.11.12 svn.r5f609507 for OlexSys. Please [let us know](#) if there are any errors or if you would like to have additional features.

# [Fe(L3)Cl<sub>2</sub>]

**Table S15 Crystal data and structure refinement for [Fe(L3)Cl<sub>2</sub>].**

|                                             |                                                                  |
|---------------------------------------------|------------------------------------------------------------------|
| Identification code                         | [Fe(L3)Cl <sub>2</sub> ]                                         |
| Empirical formula                           | C <sub>14</sub> H <sub>28</sub> Cl <sub>2</sub> FeN <sub>4</sub> |
| Formula weight                              | 379.15                                                           |
| Temperature/K                               | 120.00                                                           |
| Crystal system                              | orthorhombic                                                     |
| Space group                                 | P2 <sub>1</sub> 2 <sub>1</sub> 2 <sub>1</sub>                    |
| a/Å                                         | 7.6198(5)                                                        |
| b/Å                                         | 11.9637(8)                                                       |
| c/Å                                         | 18.6306(14)                                                      |
| α/°                                         | 90                                                               |
| β/°                                         | 90                                                               |
| γ/°                                         | 90                                                               |
| Volume/Å <sup>3</sup>                       | 1698.4(2)                                                        |
| Z                                           | 4                                                                |
| ρ <sub>calc</sub> /cm <sup>3</sup>          | 1.483                                                            |
| μ/mm <sup>-1</sup>                          | 1.202                                                            |
| F(000)                                      | 800.0                                                            |
| Crystal size/mm <sup>3</sup>                | 0.287 × 0.134 × 0.127                                            |
| Radiation                                   | MoKα (λ = 0.71073)                                               |
| 2θ range for data collection/°              | 4.046 to 56.798                                                  |
| Index ranges                                | -10 ≤ h ≤ 9, -15 ≤ k ≤ 15, -24 ≤ l ≤ 24                          |
| Reflections collected                       | 41891                                                            |
| Independent reflections                     | 4239 [R <sub>int</sub> = 0.0400, R <sub>sigma</sub> = 0.0206]    |
| Data/restraints/parameters                  | 4239/0/192                                                       |
| Goodness-of-fit on F <sup>2</sup>           | 1.061                                                            |
| Final R indexes [I ≥ 2σ (I)]                | R <sub>1</sub> = 0.0384, wR <sub>2</sub> = 0.0919                |
| Final R indexes [all data]                  | R <sub>1</sub> = 0.0400, wR <sub>2</sub> = 0.0930                |
| Largest diff. peak/hole / e Å <sup>-3</sup> | 0.94/-0.58                                                       |
| Flack parameter                             | 0.47(3)                                                          |

**Table S16 Fractional Atomic Coordinates (×10<sup>4</sup>) and Equivalent Isotropic Displacement Parameters (Å<sup>2</sup>×10<sup>3</sup>) for [Fe(L3)Cl<sub>2</sub>]. U<sub>eq</sub> is defined as 1/3 of the trace of the orthogonalised U<sub>ij</sub> tensor.**

| Atom | x           | y           | z          | U(eq)     |
|------|-------------|-------------|------------|-----------|
| Fe1  | 6185.4 (6)  | 4988.9 (5)  | 3777.3 (2) | 9.66 (12) |
| Cl1  | 4083.5 (14) | 3492.8 (9)  | 3952.1 (6) | 23.4 (2)  |
| Cl2  | 4176.0 (15) | 6404.8 (10) | 4157.2 (7) | 29.1 (3)  |
| N2   | 8387 (5)    | 6174 (3)    | 3557 (2)   | 19.2 (8)  |

**Table S16 Fractional Atomic Coordinates ( $\times 10^4$ ) and Equivalent Isotropic Displacement Parameters ( $\text{\AA}^2 \times 10^3$ ) for [Fe(L3)Cl<sub>2</sub>].  $U_{\text{eq}}$  is defined as 1/3 of the trace of the orthogonalised  $U_{ij}$  tensor.**

| Atom | x         | y        | z           | U(eq)     |
|------|-----------|----------|-------------|-----------|
| N1   | 6067 (4)  | 5129 (3) | 2536.5 (16) | 15.5 (6)  |
| N4   | 8305 (5)  | 3863 (3) | 3375 (2)    | 17.3 (7)  |
| N3   | 7930 (4)  | 4858 (4) | 4752.9 (17) | 21.3 (8)  |
| C6   | 8676 (6)  | 3173 (3) | 4011 (2)    | 21.3 (9)  |
| C7   | 7435 (6)  | 3260 (4) | 2787 (3)    | 21.1 (10) |
| C10  | 9907 (6)  | 4436 (4) | 3105 (3)    | 22.3 (9)  |
| C11  | 4184 (5)  | 5354 (4) | 2363 (2)    | 19.6 (8)  |
| C2   | 7622 (6)  | 6850 (4) | 2976 (3)    | 22.3 (10) |
| C8   | 6712 (7)  | 4072 (4) | 2217 (2)    | 22.3 (10) |
| C1   | 7167 (7)  | 6121 (4) | 2338 (2)    | 21.8 (9)  |
| C5   | 9222 (6)  | 3909 (4) | 4621 (3)    | 25.5 (10) |
| C12  | 3770 (6)  | 5482 (4) | 1574 (2)    | 23.0 (8)  |
| C4   | 8825 (8)  | 5940 (4) | 4874 (3)    | 30.8 (11) |
| C3   | 8545 (7)  | 6771 (4) | 4246 (3)    | 25.6 (10) |
| C9   | 10070 (6) | 5643 (4) | 3353 (3)    | 23.6 (10) |
| C13  | 2590 (5)  | 4899 (5) | 1233 (2)    | 28.5 (10) |
| C14  | 6780 (7)  | 4535 (5) | 5354 (2)    | 31.1 (11) |

**Table S17 Anisotropic Displacement Parameters ( $\text{\AA}^2 \times 10^3$ ) for [Fe(L3)Cl<sub>2</sub>]. The Anisotropic displacement factor exponent takes the form:  $-2\pi^2[h^2a^{*2}U_{11}+2hka^*b^*U_{12}+\dots]$ .**

| Atom | U <sub>11</sub> | U <sub>22</sub> | U <sub>33</sub> | U <sub>23</sub> | U <sub>13</sub> | U <sub>12</sub> |
|------|-----------------|-----------------|-----------------|-----------------|-----------------|-----------------|
| Fe1  | 7.83 (19)       | 11.8 (2)        | 9.3 (2)         | -0.4 (2)        | 0.57 (16)       | 0.4 (2)         |
| Cl1  | 13.8 (5)        | 21.0 (5)        | 35.3 (6)        | 8.9 (4)         | 1.7 (4)         | -5.0 (4)        |
| Cl2  | 15.5 (5)        | 27.9 (5)        | 43.9 (6)        | -20.2 (5)       | 0.5 (4)         | 5.6 (4)         |
| N2   | 13.4 (17)       | 11.0 (15)       | 33 (2)          | 5.2 (14)        | -3.1 (14)       | -1.7 (13)       |
| N1   | 11.7 (13)       | 21.3 (17)       | 13.4 (13)       | 1.0 (12)        | -2.6 (11)       | 3.2 (15)        |
| N4   | 12.8 (17)       | 14.0 (16)       | 25.0 (18)       | 1.7 (13)        | 3.1 (14)        | 0.9 (13)        |
| N3   | 16.6 (14)       | 36 (2)          | 11.0 (14)       | 1.1 (15)        | -0.1 (11)       | -1.5 (17)       |
| C6   | 19 (2)          | 15.0 (18)       | 30 (2)          | 3.5 (16)        | -4.3 (17)       | 4.4 (16)        |
| C7   | 18 (2)          | 15 (2)          | 30 (2)          | -7.4 (17)       | 4.3 (17)        | 0.9 (16)        |
| C10  | 11.0 (19)       | 23 (2)          | 33 (2)          | -1.0 (19)       | 8.1 (18)        | 2.6 (16)        |
| C11  | 12.4 (17)       | 27 (2)          | 19.4 (18)       | 2.0 (15)        | -1.0 (15)       | 2.8 (14)        |
| C2   | 20 (2)          | 13 (2)          | 34 (3)          | 6.3 (18)        | 0.6 (18)        | -2.0 (15)       |
| C8   | 29 (2)          | 20 (2)          | 18 (2)          | -6.3 (16)       | 5.4 (17)        | -3.5 (18)       |
| C1   | 25 (2)          | 21 (2)          | 19 (2)          | 10.0 (17)       | 7.9 (17)        | 4.5 (18)        |
| C5   | 24 (2)          | 22 (2)          | 30 (2)          | 8.1 (18)        | -10.8 (19)      | -2.6 (18)       |
| C12  | 17.3 (19)       | 31 (2)          | 20.3 (19)       | 5.3 (17)        | 0.1 (17)        | 5.4 (17)        |
| C4   | 35 (3)          | 24 (2)          | 34 (2)          | -10.6 (19)      | -21 (2)         | 0 (2)           |
| C3   | 25 (2)          | 15.6 (19)       | 36 (2)          | -8.9 (18)       | -10 (2)         | -3.9 (17)       |
| C9   | 13.0 (19)       | 22 (2)          | 36 (3)          | 9.0 (19)        | 1.5 (18)        | -3.5 (17)       |
| C13  | 20.8 (18)       | 44 (3)          | 20.8 (18)       | -4 (2)          | -3.1 (15)       | 0 (2)           |
| C14  | 29 (2)          | 48 (3)          | 16 (2)          | -0.1 (19)       | 3.9 (18)        | -2 (2)          |

**Table S18 Bond Lengths for [Fe(L3)Cl2].**

| Atom | Atom | Length/Å    | Atom | Atom | Length/Å  |
|------|------|-------------|------|------|-----------|
| Fe1  | Cl1  | 2.4238 (12) | N4   | C7   | 1.470 (6) |
| Fe1  | Cl2  | 2.3905 (12) | N4   | C10  | 1.487 (6) |
| Fe1  | N2   | 2.235 (4)   | N3   | C5   | 1.523 (6) |
| Fe1  | N1   | 2.320 (3)   | N3   | C4   | 1.480 (6) |
| Fe1  | N4   | 2.233 (4)   | N3   | C14  | 1.474 (6) |
| Fe1  | N3   | 2.257 (3)   | C6   | C5   | 1.496 (6) |
| N2   | C2   | 1.471 (6)   | C7   | C8   | 1.541 (7) |
| N2   | C3   | 1.474 (6)   | C10  | C9   | 1.521 (6) |
| N2   | C9   | 1.481 (6)   | C11  | C12  | 1.510 (6) |
| N1   | C11  | 1.495 (5)   | C2   | C1   | 1.515 (7) |
| N1   | C8   | 1.481 (5)   | C12  | C13  | 1.303 (7) |
| N1   | C1   | 1.500 (6)   | C4   | C3   | 1.550 (7) |
| N4   | C6   | 1.471 (5)   |      |      |           |

**Table S19 Bond Angles for [Fe(L3)Cl2].**

| Atom | Atom | Atom | Angle/°     | Atom | Atom | Atom | Angle/°   |
|------|------|------|-------------|------|------|------|-----------|
| Cl2  | Fe1  | Cl1  | 93.46 (4)   | C1   | N1   | Fe1  | 106.4 (2) |
| N2   | Fe1  | Cl1  | 171.63 (10) | C6   | N4   | Fe1  | 101.9 (3) |
| N2   | Fe1  | Cl2  | 94.90 (10)  | C6   | N4   | C10  | 111.9 (4) |
| N2   | Fe1  | N1   | 78.50 (13)  | C7   | N4   | Fe1  | 102.7 (3) |
| N2   | Fe1  | N3   | 75.50 (14)  | C7   | N4   | C6   | 114.4 (3) |
| N1   | Fe1  | Cl1  | 99.29 (9)   | C7   | N4   | C10  | 110.1 (4) |
| N1   | Fe1  | Cl2  | 102.64 (9)  | C10  | N4   | Fe1  | 115.4 (3) |
| N4   | Fe1  | Cl1  | 94.44 (10)  | C5   | N3   | Fe1  | 107.6 (3) |
| N4   | Fe1  | Cl2  | 171.99 (10) | C4   | N3   | Fe1  | 109.5 (3) |
| N4   | Fe1  | N2   | 77.20 (11)  | C4   | N3   | C5   | 112.3 (3) |
| N4   | Fe1  | N1   | 74.77 (13)  | C14  | N3   | Fe1  | 106.3 (3) |
| N4   | Fe1  | N3   | 78.60 (14)  | C14  | N3   | C5   | 108.1 (4) |
| N3   | Fe1  | Cl1  | 103.28 (11) | C14  | N3   | C4   | 112.8 (4) |
| N3   | Fe1  | Cl2  | 100.83 (11) | N4   | C6   | C5   | 109.6 (3) |
| N3   | Fe1  | N1   | 146.15 (12) | N4   | C7   | C8   | 111.4 (3) |
| C2   | N2   | Fe1  | 100.7 (3)   | N4   | C10  | C9   | 113.7 (4) |
| C2   | N2   | C3   | 114.0 (3)   | N1   | C11  | C12  | 115.4 (3) |
| C2   | N2   | C9   | 112.9 (4)   | N2   | C2   | C1   | 110.7 (4) |
| C3   | N2   | Fe1  | 102.1 (3)   | N1   | C8   | C7   | 112.3 (3) |
| C3   | N2   | C9   | 111.2 (4)   | N1   | C1   | C2   | 112.9 (3) |
| C9   | N2   | Fe1  | 115.1 (3)   | C6   | C5   | N3   | 112.4 (4) |
| C11  | N1   | Fe1  | 105.5 (2)   | C13  | C12  | C11  | 124.4 (4) |
| C11  | N1   | C1   | 109.9 (3)   | N3   | C4   | C3   | 112.5 (4) |
| C8   | N1   | Fe1  | 109.0 (2)   | N2   | C3   | C4   | 111.0 (3) |
| C8   | N1   | C11  | 112.7 (3)   | N2   | C9   | C10  | 114.5 (4) |
| C8   | N1   | C1   | 113.0 (3)   |      |      |      |           |



**Table S20 Torsion Angles for [Fe(L3)Cl2].**

| A   | B   | C   | D   | Angle/°    | A   | B  | C   | D   | Angle/°    |
|-----|-----|-----|-----|------------|-----|----|-----|-----|------------|
| Fe1 | N2  | C2  | C1  | -60.1 (4)  | C7  | N4 | C10 | C9  | 133.4 (4)  |
| Fe1 | N2  | C3  | C4  | 55.5 (4)   | C10 | N4 | C6  | C5  | 65.1 (5)   |
| Fe1 | N2  | C9  | C10 | 17.8 (5)   | C10 | N4 | C7  | C8  | -65.9 (4)  |
| Fe1 | N1  | C11 | C12 | 180.0 (3)  | C11 | N1 | C8  | C7  | -122.6 (4) |
| Fe1 | N1  | C8  | C7  | -5.8 (4)   | C11 | N1 | C1  | C2  | 100.2 (4)  |
| Fe1 | N1  | C1  | C2  | -13.5 (4)  | C2  | N2 | C3  | C4  | 163.2 (4)  |
| Fe1 | N4  | C6  | C5  | -58.7 (4)  | C2  | N2 | C9  | C10 | -97.1 (4)  |
| Fe1 | N4  | C7  | C8  | 57.5 (4)   | C8  | N1 | C11 | C12 | -61.2 (5)  |
| Fe1 | N4  | C10 | C9  | 17.7 (5)   | C8  | N1 | C1  | C2  | -133.0 (4) |
| Fe1 | N3  | C5  | C6  | -15.3 (4)  | C1  | N1 | C11 | C12 | 65.7 (5)   |
| Fe1 | N3  | C4  | C3  | -8.8 (5)   | C1  | N1 | C8  | C7  | 112.2 (4)  |
| N2  | C2  | C1  | N1  | 51.9 (5)   | C5  | N3 | C4  | C3  | 110.6 (4)  |
| N1  | C11 | C12 | C13 | 125.1 (5)  | C4  | N3 | C5  | C6  | -135.8 (4) |
| N4  | C6  | C5  | N3  | 51.6 (5)   | C3  | N2 | C2  | C1  | -168.6 (4) |
| N4  | C7  | C8  | N1  | -34.8 (5)  | C3  | N2 | C9  | C10 | 133.2 (4)  |
| N4  | C10 | C9  | N2  | -23.1 (6)  | C9  | N2 | C2  | C1  | 63.2 (5)   |
| N3  | C4  | C3  | N2  | -32.1 (6)  | C9  | N2 | C3  | C4  | -67.7 (5)  |
| C6  | N4  | C7  | C8  | 167.1 (4)  | C14 | N3 | C5  | C6  | 99.1 (4)   |
| C6  | N4  | C10 | C9  | -98.2 (4)  | C14 | N3 | C4  | C3  | -126.9 (4) |
| C7  | N4  | C6  | C5  | -168.7 (4) |     |    |     |     |            |

**Table S21 Hydrogen Atom Coordinates ( $\text{\AA} \times 10^4$ ) and Isotropic Displacement Parameters ( $\text{\AA}^2 \times 10^3$ ) for [Fe(L3)Cl2].**

| Atom | x        | y       | z       | U(eq) |
|------|----------|---------|---------|-------|
| H6A  | 9624.95  | 2634.77 | 3900.64 | 26    |
| H6B  | 7614.8   | 2745.34 | 4146.21 | 26    |
| H7A  | 6458.5   | 2807.81 | 2983.47 | 25    |
| H7B  | 8283.34  | 2743.58 | 2558.84 | 25    |
| H10A | 9896.51  | 4419.85 | 2574.01 | 27    |
| H10B | 10952.66 | 4016.18 | 3268.63 | 27    |
| H11A | 3822.52  | 6046.9  | 2612.95 | 24    |
| H11B | 3466.17  | 4734.85 | 2556.95 | 24    |
| H2A  | 8470.27  | 7432.05 | 2827.35 | 27    |
| H2B  | 6549.54  | 7227.51 | 3152.37 | 27    |
| H8A  | 7650.42  | 4244.28 | 1866.16 | 27    |
| H8B  | 5739.91  | 3705.78 | 1954.65 | 27    |
| H1A  | 6526.09  | 6576.34 | 1979.68 | 26    |
| H1B  | 8266.44  | 5856.88 | 2110.74 | 26    |
| H5A  | 10393.4  | 4227.06 | 4516.9  | 31    |
| H5B  | 9321.08  | 3451.65 | 5062.41 | 31    |
| H12  | 4412.88  | 6022.57 | 1309.08 | 28    |
| H4A  | 10098.17 | 5805.09 | 4935.54 | 37    |
| H4B  | 8376.82  | 6278.2  | 5322.56 | 37    |

**Table S21 Hydrogen Atom Coordinates ( $\text{\AA} \times 10^4$ ) and Isotropic Displacement Parameters ( $\text{\AA}^2 \times 10^3$ ) for  $[\text{Fe}(\text{L3})\text{Cl}_2]$ .**

| Atom | x        | y       | z       | U(eq) |
|------|----------|---------|---------|-------|
| H3A  | 7466.55  | 7212.02 | 4333.25 | 31    |
| H3B  | 9548.01  | 7295.78 | 4223.58 | 31    |
| H9A  | 10873    | 5669.89 | 3770.39 | 28    |
| H9B  | 10611.08 | 6086.3  | 2962.7  | 28    |
| H13A | 1924.17  | 4350.7  | 1482.18 | 34    |
| H13B | 2396.17  | 5021.72 | 735.79  | 34    |
| H14A | 5912.91  | 5125.96 | 5438.65 | 47    |
| H14B | 7487.9   | 4428.14 | 5788.08 | 47    |
| H14C | 6173     | 3836.49 | 5236.46 | 47    |

## Experimental

Single crystals of  $\text{C}_{14}\text{H}_{28}\text{Cl}_2\text{FeN}_4$   **$[\text{Fe}(\text{L3})\text{Cl}_2]$**  were **[1]**. A suitable crystal was selected and **[1]** on a **Bruker PHOTON-II** diffractometer. The crystal was kept at 120.00 K during data collection. Using Olex2 [1], the structure was solved with the SHELXT [2] structure solution program using Intrinsic Phasing and refined with the SHELXL [3] refinement package using Least Squares minimisation.

1. Dolomanov, O.V., Bourhis, L.J., Gildea, R.J., Howard, J.A.K. & Puschmann, H. (2009), J. Appl. Cryst. 42, 339-341.
2. Sheldrick, G.M. (2015). Acta Cryst. A71, 3-8.
3. Sheldrick, G.M. (2015). Acta Cryst. C71, 3-8.

## Crystal structure determination of **$[\text{Fe}(\text{L3})\text{Cl}_2]$**

**Crystal Data** for  $\text{C}_{14}\text{H}_{28}\text{Cl}_2\text{FeN}_4$  ( $M = 379.15$  g/mol): orthorhombic, space group  $P2_12_12_1$  (no. 19),  $a = 7.6198(5)$   $\text{\AA}$ ,  $b = 11.9637(8)$   $\text{\AA}$ ,  $c = 18.6306(14)$   $\text{\AA}$ ,  $V = 1698.4(2)$   $\text{\AA}^3$ ,  $Z = 4$ ,  $T = 120.00$  K,  $\mu(\text{MoK}\alpha) = 1.202$   $\text{mm}^{-1}$ ,  $D_{\text{calc}} = 1.483$   $\text{g/cm}^3$ , 41891 reflections measured ( $4.046^\circ \leq 2\theta \leq 56.798^\circ$ ), 4239 unique ( $R_{\text{int}} = 0.0400$ ,  $R_{\text{sigma}} = 0.0206$ ) which were used in all calculations. The final  $R_1$  was 0.0384 ( $I > 2\sigma(I)$ ) and  $wR_2$  was 0.0930 (all data).

## Refinement model description

Number of restraints - 0, number of constraints - unknown.

### Details:

1. Twinned data refinement  
Scales: 0.53(3)  
0.47(3)
2. Fixed Uiso  
At 1.2 times of:  
All C(H) groups, All C(H,H) groups  
At 1.5 times of:  
All C(H,H,H) groups
- 3.a Secondary CH2 refined with riding coordinates:  
C6(H6A,H6B), C7(H7A,H7B), C10(H10A,H10B), C11(H11A,H11B), C2(H2A,H2B), C8(H8A,H8B), C1(H1A,H1B), C5(H5A,H5B), C4(H4A,H4B), C3(H3A,H3B), C9(H9A,H9B)
- 3.b Aromatic/amide H refined with riding coordinates:  
C12(H12)
- 3.c X=CH2 refined with riding coordinates:  
C13(H13A,H13B)
- 3.d Idealised Me refined as rotating group:  
C14(H14A,H14B,H14C)

This report has been created with Olex2, compiled on 2020.11.12 svn.r5f609507 for OlexSys. Please [let us know](#) if there are any errors or if you would like to have additional features.

# L8-precursor

**Table S22 Crystal data and structure refinement for L8-precursor.**

|                     |                                                            |
|---------------------|------------------------------------------------------------|
| Identification code | L8-precursor                                               |
| Empirical formula   | $\text{C}_{20}\text{H}_{34}\text{I}_2\text{N}_4\text{O}_2$ |
| Formula weight      | 616.31                                                     |

|                                                |                                                                    |
|------------------------------------------------|--------------------------------------------------------------------|
| Temperature/K                                  | 150                                                                |
| Crystal system                                 | monoclinic                                                         |
| Space group                                    | P2 <sub>1</sub> /n                                                 |
| a/Å                                            | 9.5389(10)                                                         |
| b/Å                                            | 16.9155(17)                                                        |
| c/Å                                            | 14.7768(14)                                                        |
| $\alpha/^\circ$                                | 90                                                                 |
| $\beta/^\circ$                                 | 91.479(4)                                                          |
| $\gamma/^\circ$                                | 90                                                                 |
| Volume/Å <sup>3</sup>                          | 2383.5(4)                                                          |
| Z                                              | 4                                                                  |
| $\rho_{\text{calc}}/\text{g}/\text{cm}^3$      | 1.717                                                              |
| $\mu/\text{mm}^{-1}$                           | 3.350                                                              |
| F(000)                                         | 1216.0                                                             |
| Crystal size/mm <sup>3</sup>                   | 0.05 × 0.02 × 0.01                                                 |
| Radiation                                      | synchrotron ( $\lambda = 0.7749$ )                                 |
| 2 $\theta$ range for data collection/ $^\circ$ | 3.992 to 52.228                                                    |
| Index ranges                                   | $-10 \leq h \leq 10$ , $-19 \leq k \leq 19$ , $-16 \leq l \leq 16$ |
| Reflections collected                          | 37933                                                              |
| Independent reflections                        | 3652 [ $R_{\text{int}} = 0.1904$ , $R_{\text{sigma}} = 0.0979$ ]   |
| Data/restraints/parameters                     | 3652/0/269                                                         |
| Goodness-of-fit on $F^2$                       | 1.037                                                              |
| Final R indexes [ $ I  \geq 2\sigma(I)$ ]      | $R_1 = 0.0617$ , $wR_2 = 0.1579$                                   |
| Final R indexes [all data]                     | $R_1 = 0.0820$ , $wR_2 = 0.1757$                                   |
| Largest diff. peak/hole / e Å <sup>-3</sup>    | 1.03/-0.74                                                         |

**Table S23 Fractional Atomic Coordinates ( $\times 10^4$ ) and Equivalent Isotropic Displacement Parameters ( $\text{\AA}^2 \times 10^3$ ) for L8-precursor.  $U_{\text{eq}}$  is defined as 1/3 of the trace of the orthogonalised  $U_{ij}$  tensor.**

| Atom | x            | y          | z           | $U_{\text{eq}}$ |
|------|--------------|------------|-------------|-----------------|
| I1   | -1606.2 (17) | 5768.0 (4) | 2280.9 (12) | 74.5 (5)        |
| I2   | 1221.0 (7)   | 2067.0 (9) | 4507.7 (5)  | 55.8 (4)        |
| O1   | 1226 (9)     | 4926 (5)   | 3641 (6)    | 72 (3)          |
| O2   | 1327 (12)    | 4027 (5)   | 5238 (6)    | 109 (3)         |
| N1   | 3579 (7)     | 3694 (4)   | 2204 (4)    | 47.0 (15)       |
| N2   | 2035 (7)     | 2318 (4)   | 1576 (4)    | 46.3 (15)       |
| N3   | -147 (7)     | 3009 (4)   | 1621 (5)    | 52.5 (17)       |
| N4   | 2060 (7)     | 3957 (4)   | 897 (5)     | 51.9 (17)       |
| C1   | 4270 (9)     | 3027 (5)   | 1713 (6)    | 53 (2)          |
| C2   | 3499 (9)     | 2266 (5)   | 1848 (6)    | 55 (2)          |
| C3   | 1364 (9)     | 1554 (5)   | 1766 (7)    | 58 (2)          |
| C4   | -115 (9)     | 1557 (5)   | 1375 (7)    | 62 (2)          |
| C5   | -912 (10)    | 2234 (5)   | 1774 (7)    | 64 (2)          |
| C6   | -106 (10)    | 3208 (6)   | 647 (7)     | 66 (2)          |
| C7   | 651 (10)     | 3978 (5)   | 502 (6)     | 64 (2)          |

**Table S23 Fractional Atomic Coordinates ( $\times 10^4$ ) and Equivalent Isotropic Displacement Parameters ( $\text{\AA}^2 \times 10^3$ ) for L8-precursor.  $U_{eq}$  is defined as 1/3 of the trace of the orthogonalised  $U_{ij}$  tensor.**

| Atom | x          | y         | z         | $U_{eq}$  |
|------|------------|-----------|-----------|-----------|
| C8   | 2721 (11)  | 4736 (5)  | 734 (6)   | 67 (2)    |
| C9   | 4198 (10)  | 4710 (5)  | 1047 (6)  | 65 (2)    |
| C10  | 4331 (10)  | 4470 (5)  | 2041 (6)  | 57 (2)    |
| C11  | 2080 (8)   | 3748 (4)  | 1860 (5)  | 46.8 (19) |
| C12  | 1324 (9)   | 2964 (4)  | 2015 (6)  | 48.5 (19) |
| C13  | 3615 (9)   | 3555 (5)  | 3237 (5)  | 53 (2)    |
| C14  | 5045 (9)   | 3573 (5)  | 3673 (5)  | 54 (2)    |
| C15  | 5527 (13)  | 4268 (6)  | 4058 (6)  | 72 (3)    |
| C16  | 6845 (14)  | 4293 (8)  | 4461 (7)  | 83 (3)    |
| C17  | 7678 (12)  | 3637 (9)  | 4505 (7)  | 83 (3)    |
| C18  | 7186 (11)  | 2939 (7)  | 4138 (7)  | 75 (3)    |
| C19  | 5886 (10)  | 2905 (5)  | 3719 (6)  | 60 (2)    |
| C20  | -981 (10)  | 3608 (5)  | 2143 (8)  | 73 (3)    |
| I2A  | 1278 (14)  | 2449 (15) | 4674 (10) | 55.8 (4)  |
| I1A  | -2123 (19) | 5732 (6)  | 1885 (14) | 74.5 (5)  |
| O1A  | 400 (40)   | 5230 (20) | 3610 (30) | 72 (3)    |

**Table S24 Anisotropic Displacement Parameters ( $\text{\AA}^2 \times 10^3$ ) for L8-precursor. The Anisotropic displacement factor exponent takes the form:  $-2\pi^2[h^2a^{*2}U_{11}+2hka^*b^*U_{12}+...]$ .**

| Atom | $U_{11}$ | $U_{22}$ | $U_{33}$  | $U_{23}$ | $U_{13}$ | $U_{12}$ |
|------|----------|----------|-----------|----------|----------|----------|
| I1   | 89.3 (8) | 48.5 (4) | 86.2 (10) | -1.3 (4) | 9.9 (7)  | 9.8 (4)  |
| I2   | 63.3 (4) | 52.9 (8) | 51.5 (4)  | 5.2 (4)  | 9.0 (3)  | -4.5 (3) |
| O1   | 66 (6)   | 60 (5)   | 89 (6)    | -13 (4)  | -17 (5)  | 3 (4)    |
| O2   | 135 (7)  | 87 (5)   | 103 (6)   | -13 (5)  | -4 (6)   | -9 (6)   |
| N1   | 55 (4)   | 47 (4)   | 39 (4)    | 6 (3)    | 9 (3)    | -6 (3)   |
| N2   | 52 (4)   | 38 (3)   | 49 (4)    | -2 (3)   | 4 (3)    | 2 (3)    |
| N3   | 55 (4)   | 38 (4)   | 65 (5)    | -3 (3)   | 12 (3)   | 1 (3)    |
| N4   | 56 (4)   | 48 (4)   | 52 (4)    | 11 (3)   | 5 (3)    | -1 (3)   |
| C1   | 59 (5)   | 56 (5)   | 44 (5)    | 6 (4)    | 12 (4)   | 7 (4)    |
| C2   | 65 (6)   | 51 (5)   | 49 (5)    | -5 (4)   | 5 (4)    | 4 (4)    |
| C3   | 64 (6)   | 38 (4)   | 72 (6)    | 1 (4)    | 6 (4)    | 1 (4)    |
| C4   | 61 (6)   | 46 (5)   | 79 (6)    | -12 (4)  | 8 (5)    | -5 (4)   |
| C5   | 60 (6)   | 54 (5)   | 78 (7)    | -11 (5)  | 7 (5)    | -9 (4)   |
| C6   | 61 (6)   | 70 (6)   | 67 (6)    | 3 (5)    | -1 (5)   | 7 (5)    |
| C7   | 74 (6)   | 59 (5)   | 59 (6)    | 20 (5)   | 4 (5)    | 10 (5)   |
| C8   | 85 (7)   | 62 (6)   | 54 (5)    | 20 (4)   | 6 (5)    | 3 (5)    |
| C9   | 84 (7)   | 56 (5)   | 56 (6)    | 22 (4)   | 14 (5)   | -14 (5)  |
| C10  | 72 (6)   | 45 (4)   | 53 (5)    | 7 (4)    | 8 (4)    | -11 (4)  |
| C11  | 60 (5)   | 37 (4)   | 45 (5)    | 4 (3)    | 18 (4)   | 2 (3)    |
| C12  | 55 (5)   | 42 (4)   | 48 (5)    | -5 (3)   | 5 (4)    | 0 (3)    |
| C13  | 63 (5)   | 51 (5)   | 46 (5)    | 3 (4)    | 1 (4)    | 1 (4)    |
| C14  | 73 (6)   | 43 (5)   | 45 (5)    | 1 (4)    | 16 (4)   | -8 (4)   |
| C15  | 99 (8)   | 62 (6)   | 53 (6)    | 6 (4)    | 3 (6)    | -18 (5)  |

**Table S24 Anisotropic Displacement Parameters ( $\text{\AA}^2 \times 10^3$ ) for L8-precursor. The Anisotropic displacement factor exponent takes the form:  $-2\pi^2[h^2a^{*2}U_{11}+2hka^*b^*U_{12}+\dots]$ .**

| Atom | $U_{11}$ | $U_{22}$ | $U_{33}$  | $U_{23}$ | $U_{13}$ | $U_{12}$ |
|------|----------|----------|-----------|----------|----------|----------|
| C16  | 108 (9)  | 89 (8)   | 53 (6)    | 3 (5)    | -2 (6)   | -43 (7)  |
| C17  | 75 (7)   | 128 (11) | 45 (6)    | -4 (6)   | 1 (5)    | -30 (7)  |
| C18  | 66 (7)   | 98 (8)   | 61 (6)    | 17 (6)   | 11 (5)   | -2 (6)   |
| C19  | 66 (6)   | 65 (6)   | 49 (5)    | -1 (4)   | 5 (4)    | -8 (4)   |
| C20  | 66 (6)   | 46 (5)   | 107 (8)   | -19 (5)  | 30 (6)   | 2 (4)    |
| I2A  | 63.3 (4) | 52.9 (8) | 51.5 (4)  | 5.2 (4)  | 9.0 (3)  | -4.5 (3) |
| I1A  | 89.3 (8) | 48.5 (4) | 86.2 (10) | -1.3 (4) | 9.9 (7)  | 9.8 (4)  |
| O1A  | 66 (6)   | 60 (5)   | 89 (6)    | -13 (4)  | -17 (5)  | 3 (4)    |

**Table S25 Bond Lengths for L8-precursor.**

| Atom | Atom | Length/ $\text{\AA}$ | Atom | Atom | Length/ $\text{\AA}$ |
|------|------|----------------------|------|------|----------------------|
| N1   | C1   | 1.503 (10)           | C1   | C2   | 1.499 (12)           |
| N1   | C10  | 1.517 (10)           | C3   | C4   | 1.510 (12)           |
| N1   | C11  | 1.508 (10)           | C4   | C5   | 1.503 (12)           |
| N1   | C13  | 1.544 (10)           | C6   | C7   | 1.507 (13)           |
| N2   | C2   | 1.446 (11)           | C8   | C9   | 1.472 (14)           |
| N2   | C3   | 1.472 (10)           | C9   | C10  | 1.525 (12)           |
| N2   | C12  | 1.449 (10)           | C11  | C12  | 1.530 (11)           |
| N3   | C5   | 1.520 (11)           | C13  | C14  | 1.493 (12)           |
| N3   | C6   | 1.481 (12)           | C14  | C15  | 1.380 (12)           |
| N3   | C12  | 1.506 (11)           | C14  | C19  | 1.386 (13)           |
| N3   | C20  | 1.512 (11)           | C15  | C16  | 1.377 (16)           |
| N4   | C7   | 1.452 (11)           | C16  | C17  | 1.366 (17)           |
| N4   | C8   | 1.484 (12)           | C17  | C18  | 1.376 (15)           |
| N4   | C11  | 1.465 (10)           | C18  | C19  | 1.373 (14)           |

**Table S26 Bond Angles for L8-precursor.**

| Atom | Atom | Atom | Angle/ $^\circ$ | Atom | Atom | Atom | Angle/ $^\circ$ |
|------|------|------|-----------------|------|------|------|-----------------|
| C1   | N1   | C10  | 111.0 (6)       | C4   | C5   | N3   | 110.4 (7)       |
| C1   | N1   | C11  | 107.8 (6)       | N3   | C6   | C7   | 111.0 (8)       |
| C1   | N1   | C13  | 111.3 (6)       | N4   | C7   | C6   | 111.4 (7)       |
| C10  | N1   | C13  | 106.9 (6)       | C9   | C8   | N4   | 109.2 (7)       |
| C11  | N1   | C10  | 110.0 (6)       | C8   | C9   | C10  | 111.5 (7)       |
| C11  | N1   | C13  | 109.8 (6)       | N1   | C10  | C9   | 110.8 (7)       |
| C2   | N2   | C3   | 108.3 (6)       | N1   | C11  | C12  | 110.1 (6)       |
| C2   | N2   | C12  | 112.5 (6)       | N4   | C11  | N1   | 109.3 (6)       |
| C12  | N2   | C3   | 111.4 (6)       | N4   | C11  | C12  | 111.1 (7)       |
| C6   | N3   | C5   | 111.4 (7)       | N2   | C12  | N3   | 107.9 (6)       |
| C6   | N3   | C12  | 109.9 (6)       | N2   | C12  | C11  | 111.0 (7)       |
| C6   | N3   | C20  | 111.8 (7)       | N3   | C12  | C11  | 109.7 (6)       |
| C12  | N3   | C5   | 110.2 (6)       | C14  | C13  | N1   | 114.9 (7)       |
| C12  | N3   | C20  | 109.5 (7)       | C15  | C14  | C13  | 119.1 (8)       |

**Table S26 Bond Angles for L8-precursor.**

| Atom | Atom | Atom | Angle/°   | Atom | Atom | Atom | Angle/°    |
|------|------|------|-----------|------|------|------|------------|
| C20  | N3   | C5   | 103.9 (7) | C15  | C14  | C19  | 119.2 (9)  |
| C7   | N4   | C8   | 107.8 (7) | C19  | C14  | C13  | 121.7 (8)  |
| C7   | N4   | C11  | 112.6 (6) | C16  | C15  | C14  | 119.7 (11) |
| C11  | N4   | C8   | 112.1 (7) | C17  | C16  | C15  | 121.3 (10) |
| C2   | C1   | N1   | 111.0 (6) | C16  | C17  | C18  | 119.1 (11) |
| N2   | C2   | C1   | 112.5 (7) | C19  | C18  | C17  | 120.6 (11) |
| N2   | C3   | C4   | 109.3 (7) | C18  | C19  | C14  | 120.2 (9)  |
| C5   | C4   | C3   | 109.3 (7) |      |      |      |            |

**Table S27 Torsion Angles for L8-precursor.**

| A  | B   | C   | D   | Angle/°    | A   | B   | C   | D   | Angle/°    |
|----|-----|-----|-----|------------|-----|-----|-----|-----|------------|
| N1 | C1  | C2  | N2  | 56.1 (9)   | C8  | N4  | C11 | C12 | 176.9 (7)  |
| N1 | C11 | C12 | N2  | -57.7 (8)  | C8  | C9  | C10 | N1  | 54.5 (10)  |
| N1 | C11 | C12 | N3  | -176.8 (6) | C10 | N1  | C1  | C2  | -178.1 (7) |
| N1 | C13 | C14 | C15 | 95.2 (9)   | C10 | N1  | C11 | N4  | 57.2 (8)   |
| N1 | C13 | C14 | C19 | -86.3 (10) | C10 | N1  | C11 | C12 | 179.5 (6)  |
| N2 | C3  | C4  | C5  | -57.7 (10) | C10 | N1  | C13 | C14 | -54.7 (9)  |
| N3 | C6  | C7  | N4  | 56.5 (10)  | C11 | N1  | C1  | C2  | -57.6 (8)  |
| N4 | C8  | C9  | C10 | -56.3 (10) | C11 | N1  | C10 | C9  | -54.0 (9)  |
| N4 | C11 | C12 | N2  | 63.6 (9)   | C11 | N1  | C13 | C14 | -174.0 (6) |
| N4 | C11 | C12 | N3  | -55.5 (8)  | C11 | N4  | C7  | C6  | -55.1 (10) |
| C1 | N1  | C10 | C9  | 65.2 (9)   | C11 | N4  | C8  | C9  | 60.9 (9)   |
| C1 | N1  | C11 | N4  | -64.0 (7)  | C12 | N2  | C2  | C1  | -54.4 (9)  |
| C1 | N1  | C11 | C12 | 58.4 (7)   | C12 | N2  | C3  | C4  | 63.2 (9)   |
| C1 | N1  | C13 | C14 | 66.6 (9)   | C12 | N3  | C5  | C4  | -56.7 (10) |
| C2 | N2  | C3  | C4  | -172.6 (7) | C12 | N3  | C6  | C7  | -57.8 (9)  |
| C2 | N2  | C12 | N3  | 175.0 (6)  | C13 | N1  | C1  | C2  | 63.0 (9)   |
| C2 | N2  | C12 | C11 | 54.8 (9)   | C13 | N1  | C10 | C9  | -173.2 (7) |
| C3 | N2  | C2  | C1  | -177.9 (7) | C13 | N1  | C11 | N4  | 174.5 (6)  |
| C3 | N2  | C12 | N3  | -63.3 (8)  | C13 | N1  | C11 | C12 | -63.2 (8)  |
| C3 | N2  | C12 | C11 | 176.6 (7)  | C13 | C14 | C15 | C16 | -179.9 (8) |
| C3 | C4  | C5  | N3  | 55.3 (11)  | C13 | C14 | C19 | C18 | -178.9 (8) |
| C5 | N3  | C6  | C7  | 179.8 (7)  | C14 | C15 | C16 | C17 | -1.4 (16)  |
| C5 | N3  | C12 | N2  | 59.2 (8)   | C15 | C14 | C19 | C18 | -0.4 (13)  |
| C5 | N3  | C12 | C11 | -179.8 (7) | C15 | C16 | C17 | C18 | 0.0 (16)   |
| C6 | N3  | C5  | C4  | 65.5 (10)  | C16 | C17 | C18 | C19 | 1.2 (15)   |
| C6 | N3  | C12 | N2  | -63.9 (8)  | C17 | C18 | C19 | C14 | -1.0 (14)  |
| C6 | N3  | C12 | C11 | 57.1 (8)   | C19 | C14 | C15 | C16 | 1.6 (14)   |
| C7 | N4  | C8  | C9  | -174.5 (7) | C20 | N3  | C5  | C4  | -174.0 (8) |
| C7 | N4  | C11 | N1  | 176.8 (6)  | C20 | N3  | C6  | C7  | 64.1 (10)  |
| C7 | N4  | C11 | C12 | 55.1 (9)   | C20 | N3  | C12 | N2  | 173.0 (7)  |
| C8 | N4  | C7  | C6  | -179.4 (8) | C20 | N3  | C12 | C11 | -66.1 (8)  |
| C8 | N4  | C11 | N1  | -61.4 (8)  |     |     |     |     |            |

**Table S28 Hydrogen Atom Coordinates ( $\text{\AA}\times 10^4$ ) and Isotropic Displacement Parameters ( $\text{\AA}^2\times 10^3$ ) for L8-precursor.**

| Atom | x        | y       | z       | U(eq) |
|------|----------|---------|---------|-------|
| H2C  | 1331.05  | 4182.93 | 5785.45 | 163   |
| H2D  | 1274.6   | 3525.8  | 5222.6  | 163   |
| H1A  | 4289.32  | 3150.11 | 1058.12 | 64    |
| H1B  | 5250.65  | 2969.01 | 1938.95 | 64    |
| H2A  | 3949.7   | 1843.76 | 1493.48 | 66    |
| H2B  | 3570.51  | 2115.63 | 2495.09 | 66    |
| H3A  | 1347.43  | 1466.31 | 2427.82 | 69    |
| H3B  | 1906.34  | 1120.35 | 1492.64 | 69    |
| H4A  | -95.34   | 1613.24 | 708.92  | 74    |
| H4B  | -583.72  | 1051.77 | 1517.23 | 74    |
| H5A  | -1016.23 | 2147.04 | 2431.01 | 77    |
| H5B  | -1861.45 | 2261.41 | 1488.42 | 77    |
| H6A  | -1075.62 | 3249.15 | 395.69  | 79    |
| H6B  | 375.72   | 2780.02 | 319.68  | 79    |
| H7A  | 700.69   | 4084.47 | -155.06 | 77    |
| H7B  | 118.22   | 4413.52 | 779.58  | 77    |
| H8A  | 2666.86  | 4863.34 | 79.92   | 81    |
| H8B  | 2217.49  | 5153.67 | 1064.72 | 81    |
| H9A  | 4628.42  | 5236.63 | 966.72  | 78    |
| H9B  | 4714.29  | 4326.51 | 674.5   | 78    |
| H10A | 5334.42  | 4413.7  | 2216.4  | 68    |
| H10B | 3923.45  | 4887.71 | 2422.1  | 68    |
| H11  | 1594.48  | 4174.07 | 2201.13 | 56    |
| H12  | 1286.8   | 2857.36 | 2679.77 | 58    |
| H13A | 3031.59  | 3963.36 | 3523.48 | 64    |
| H13B | 3184.46  | 3034.43 | 3359.41 | 64    |
| H15  | 4953.73  | 4727.35 | 4044.71 | 86    |
| H16  | 7180.91  | 4776.23 | 4712.4  | 100   |
| H17  | 8584.72  | 3661.41 | 4785    | 99    |
| H18  | 7750.03  | 2477.25 | 4175.88 | 90    |
| H19  | 5561.87  | 2422.7  | 3459.32 | 72    |
| H20A | -901.95  | 3490.17 | 2791.15 | 109   |
| H20B | -1968.61 | 3583.17 | 1944.07 | 109   |
| H20C | -614.68  | 4139.43 | 2030.34 | 109   |

**Table S29 Atomic Occupancy for L8-precursor.**

| Atom | Occupancy | Atom | Occupancy | Atom | Occupancy  |
|------|-----------|------|-----------|------|------------|
| I1   | 0.921 (5) | I2   | 0.948 (4) | O1   | 0.807 (14) |
| I2A  | 0.052 (4) | I1A  | 0.079 (5) | O1A  | 0.193 (14) |

#### Experimental

Single crystals of  $\text{C}_{20}\text{H}_{34}\text{I}_2\text{N}_4\text{O}_2$  [L8-precursor] were [1]. A suitable crystal was selected and [1] on a diffractometer. The crystal was kept at 150 K during data collection. Using Olex2 [1], the structure was solved

with the SHELXT [2] structure solution program using Intrinsic Phasing and refined with the SHELXL [3] refinement package using Least Squares minimisation.

1. Dolomanov, O.V., Bourhis, L.J., Gildea, R.J., Howard, J.A.K. & Puschmann, H. (2009), J. Appl. Cryst. 42, 339-341.
2. Sheldrick, G.M. (2015). Acta Cryst. A71, 3-8.
3. Sheldrick, G.M. (2015). Acta Cryst. C71, 3-8.

#### Crystal structure determination of [L8-precursor]

**Crystal Data** for  $C_{20}H_{34}I_2N_4O_2$  ( $M=616.31$  g/mol): monoclinic, space group  $P2_1/n$  (no. 14),  $a = 9.5389(10)$  Å,  $b = 16.9155(17)$  Å,  $c = 14.7768(14)$  Å,  $\beta = 91.479(4)^\circ$ ,  $V = 2383.5(4)$  Å<sup>3</sup>,  $Z = 4$ ,  $T = 150$  K,  $\mu(\text{synchrotron}) = 3.350$  mm<sup>-1</sup>,  $D_{\text{calc}} = 1.717$  g/cm<sup>3</sup>, 37933 reflections measured ( $3.992^\circ \leq 2\theta \leq 52.228^\circ$ ), 3652 unique ( $R_{\text{int}} = 0.1904$ ,  $R_{\text{sigma}} = 0.0979$ ) which were used in all calculations. The final  $R_1$  was 0.0617 ( $I > 2\sigma(I)$ ) and  $wR_2$  was 0.1757 (all data).

#### Refinement model description

Number of restraints - 0, number of constraints - unknown.

##### Details:

1. Fixed Uiso  
At 1.2 times of:  
All C(H) groups, All C(H,H) groups  
At 1.5 times of:  
All C(H,H,H) groups, All O(H,H) groups
2. Uiso/Uanis restraints and constraints  
Uanis(I2A) = Uanis(I2)  
Uanis(I1A) = Uanis(I1)  
Uanis(O1A) = Uanis(O1)
3. Others  
Sof(I2A)=1-FVAR(1)  
Sof(I2)=FVAR(1)  
Sof(I1A)=1-FVAR(2)  
Sof(I1)=FVAR(2)  
Sof(O1A)=1-FVAR(3)  
Sof(O1)=FVAR(3)
- 4.a Free rotating group:  
O2(H2C,H2D)
- 4.b Ternary CH refined with riding coordinates:  
C11(H11), C12(H12)
- 4.c Secondary CH2 refined with riding coordinates:  
C1(H1A,H1B), C2(H2A,H2B), C3(H3A,H3B), C4(H4A,H4B), C5(H5A,H5B), C6(H6A,H6B),  
C7(H7A,H7B), C8(H8A,H8B), C9(H9A,H9B), C10(H10A,H10B), C13(H13A,H13B)
- 4.d Aromatic/amide H refined with riding coordinates:  
C15(H15), C16(H16), C17(H17), C18(H18), C19(H19)
- 4.e Idealised Me refined as rotating group:  
C20(H20A,H20B,H20C)

This report has been created with Olex2, compiled on 2020.11.12 svn.r5f609507 for OlexSys. Please [let us know](#) if there are any errors or if you would like to have additional features.

## [Mn(L9)Cl<sub>2</sub>]

**Table S30 Crystal data and structure refinement for [Mn(L9)Cl<sub>2</sub>].**

|                     |                                                                  |
|---------------------|------------------------------------------------------------------|
| Identification code | [Mn(L9)Cl <sub>2</sub> ]                                         |
| Empirical formula   | C <sub>16</sub> H <sub>30</sub> Cl <sub>2</sub> MnN <sub>4</sub> |
| Formula weight      | 404.28                                                           |
| Temperature/K       | 120                                                              |
| Crystal system      | triclinic                                                        |
| Space group         | P-1                                                              |
| a/Å                 | 8.5540(11)                                                       |
| b/Å                 | 13.2482(17)                                                      |
| c/Å                 | 17.920(2)                                                        |
| $\alpha/^\circ$     | 107.492(2)                                                       |
| $\beta/^\circ$      | 95.600(2)                                                        |



|                                                |                                                               |
|------------------------------------------------|---------------------------------------------------------------|
| $\gamma/^\circ$                                | 97.994(2)                                                     |
| Volume/ $\text{\AA}^3$                         | 1897.0(4)                                                     |
| Z                                              | 4                                                             |
| $\rho_{\text{calc}}/\text{g/cm}^3$             | 1.416                                                         |
| $\mu/\text{mm}^{-1}$                           | 0.982                                                         |
| F(000)                                         | 852.0                                                         |
| Crystal size/ $\text{mm}^3$                    | $0.253 \times 0.154 \times 0.05$                              |
| Radiation                                      | Mo K $\alpha$ ( $\lambda = 0.71073$ )                         |
| 2 $\theta$ range for data collection/ $^\circ$ | 2.41 to 56.584                                                |
| Index ranges                                   | $-11 \leq h \leq 11, -17 \leq k \leq 17, -23 \leq l \leq 23$  |
| Reflections collected                          | 29491                                                         |
| Independent reflections                        | 9415 [ $R_{\text{int}} = 0.0370, R_{\text{sigma}} = 0.0433$ ] |
| Data/restraints/parameters                     | 9415/41/437                                                   |
| Goodness-of-fit on $F^2$                       | 1.005                                                         |
| Final R indexes [ $ I  \geq 2\sigma(I)$ ]      | $R_1 = 0.0307, wR_2 = 0.0591$                                 |
| Final R indexes [all data]                     | $R_1 = 0.0499, wR_2 = 0.0645$                                 |
| Largest diff. peak/hole / $e \text{\AA}^{-3}$  | 0.33/-0.51                                                    |

**Table S31 Fractional Atomic Coordinates ( $\times 10^4$ ) and Equivalent Isotropic Displacement Parameters ( $\text{\AA}^2 \times 10^3$ ) for [Mn(L9)Cl<sub>2</sub>].  $U_{\text{eq}}$  is defined as 1/3 of the trace of the orthogonalised  $U_{ij}$  tensor.**

| Atom | x           | y            | z           | $U(\text{eq})$ |
|------|-------------|--------------|-------------|----------------|
| Mn1  | 7920.4 (3)  | 8362.4 (2)   | 7883.3 (2)  | 13.23 (6)      |
| Mn2  | 2915.8 (3)  | 2990.6 (2)   | 7116.7 (2)  | 15.60 (6)      |
| Cl1  | 10749.1 (5) | 9097.0 (3)   | 8302.6 (2)  | 19.59 (9)      |
| Cl2  | 7557.1 (5)  | 9291.8 (3)   | 6906.2 (2)  | 18.64 (9)      |
| Cl4  | 2221.8 (5)  | 4600.1 (3)   | 6919.1 (2)  | 20.45 (9)      |
| Cl3  | 5556.3 (6)  | 3763.7 (4)   | 7906.3 (3)  | 33.38 (12)     |
| N4   | 7821.6 (17) | 7371.3 (11)  | 8738.2 (8)  | 16.9 (3)       |
| N8   | 2964.5 (17) | 1312.5 (11)  | 7214.0 (8)  | 18.5 (3)       |
| N1   | 6949.4 (16) | 9484.7 (11)  | 8943.9 (8)  | 16.4 (3)       |
| N3   | 7833.7 (17) | 6588.2 (11)  | 7119.3 (8)  | 17.4 (3)       |
| N6   | 726.7 (17)  | 1878.4 (11)  | 6257.7 (8)  | 16.9 (3)       |
| N2   | 5300.2 (16) | 7651.4 (11)  | 7764.6 (8)  | 16.3 (3)       |
| N5   | 1090.7 (18) | 2771.8 (11)  | 7979.7 (8)  | 20.3 (3)       |
| N7   | 3860.2 (18) | 2102.5 (12)  | 5929.6 (9)  | 22.8 (3)       |
| C7   | 8333 (2)    | 8245.8 (14)  | 9492.3 (9)  | 20.0 (4)       |
| C6   | 9033 (2)    | 6702.7 (14)  | 8494.7 (10) | 21.3 (4)       |
| C3   | 5033 (2)    | 6938.0 (14)  | 6940.4 (10) | 19.2 (4)       |
| C11  | 7905 (2)    | 10575.2 (13) | 9115.1 (10) | 18.7 (4)       |
| C5   | 8647 (2)    | 6031.7 (14)  | 7612.9 (10) | 21.6 (4)       |
| C23  | 944 (2)     | 2126.9 (15)  | 5527.4 (10) | 23.3 (4)       |
| C30  | 1581 (2)    | 462.1 (13)   | 6804.4 (10) | 20.0 (4)       |
| C14  | 8680 (2)    | 6653.8 (14)  | 6441.0 (10) | 22.0 (4)       |
| C29  | 607 (2)     | 714.1 (13)   | 6138.2 (10) | 20.7 (4)       |
| C10  | 6259 (2)    | 6716.3 (14)  | 8707.7 (10) | 21.5 (4)       |

**Table S31 Fractional Atomic Coordinates ( $\times 10^4$ ) and Equivalent Isotropic Displacement Parameters ( $\text{\AA}^2 \times 10^3$ ) for [Mn(L9)Cl<sub>2</sub>].  $U_{eq}$  is defined as 1/3 of the trace of the orthogonalised  $U_{ij}$  tensor.**

| Atom | x           | y            | z           | U(eq)     |
|------|-------------|--------------|-------------|-----------|
| C4   | 6113 (2)    | 6101.3 (13)  | 6840.6 (10) | 19.8 (4)  |
| C9   | 4848 (2)    | 7081.8 (14)  | 8327.5 (10) | 20.6 (4)  |
| C8   | 7206 (2)    | 9056.3 (14)  | 9618.2 (10) | 20.5 (4)  |
| C27  | 3095 (2)    | 1559.7 (15)  | 8076.9 (10) | 25.9 (4)  |
| C2   | 4559 (2)    | 8611.6 (14)  | 7873.8 (10) | 20.0 (4)  |
| C22  | -577 (2)    | 2318.8 (15)  | 6644.6 (10) | 21.4 (4)  |
| C28  | 1699 (2)    | 2062.5 (14)  | 8404.1 (10) | 25.9 (4)  |
| C12  | 7440 (2)    | 11460.4 (14) | 9749.8 (10) | 21.9 (4)  |
| C21  | -489 (2)    | 2248.4 (15)  | 7474.9 (10) | 23.0 (4)  |
| C1   | 5235.3 (19) | 9464.2 (14)  | 8677.3 (10) | 20.6 (4)  |
| C26  | 4440 (2)    | 1092.8 (15)  | 6891.5 (12) | 27.5 (4)  |
| C25  | 4334 (2)    | 1105.2 (15)  | 6042.2 (12) | 29.5 (5)  |
| C15  | 8720 (2)    | 5594.7 (15)  | 5835.9 (11) | 27.6 (4)  |
| C16  | 7949 (3)    | 5288.3 (16)  | 5114.0 (11) | 32.1 (5)  |
| C24  | 2544 (2)    | 1877.7 (15)  | 5265.4 (10) | 27.7 (4)  |
| C31  | 869 (2)     | 3810.7 (15)  | 8549.3 (11) | 29.7 (4)  |
| C13  | 7021 (2)    | 12330.0 (15) | 9639.9 (12) | 30.6 (4)  |
| C32  | 2356 (3)    | 4444.3 (15)  | 9071.3 (11) | 37.6 (5)  |
| C34  | 5125 (9)    | 2749 (6)     | 5703 (3)    | 18.3 (8)  |
| C33  | 2497 (4)    | 4779.5 (17)  | 9851.5 (13) | 51.2 (7)  |
| C35  | 5696 (6)    | 2253 (4)     | 4928 (3)    | 23.2 (10) |
| C36  | 7176 (5)    | 2470 (3)     | 4812 (2)    | 26.5 (12) |
| C34A | 5353 (7)    | 2918 (5)     | 5978 (3)    | 18.3 (8)  |
| C35A | 6310 (5)    | 2619 (3)     | 5302 (3)    | 22.4 (9)  |
| C36A | 6035 (5)    | 1782 (4)     | 4665 (2)    | 27.7 (11) |

**Table S32 Anisotropic Displacement Parameters ( $\text{\AA}^2 \times 10^3$ ) for [Mn(L9)Cl<sub>2</sub>]. The Anisotropic displacement factor exponent takes the form:  $-2\pi^2[h^2a^{*2}U_{11}+2hka^*b^*U_{12}+\dots]$ .**

| Atom | U <sub>11</sub> | U <sub>22</sub> | U <sub>33</sub> | U <sub>23</sub> | U <sub>13</sub> | U <sub>12</sub> |
|------|-----------------|-----------------|-----------------|-----------------|-----------------|-----------------|
| Mn1  | 11.87 (13)      | 13.23 (13)      | 15.29 (12)      | 5.1 (1)         | 3.9 (1)         | 1.94 (10)       |
| Mn2  | 14.74 (13)      | 13.00 (13)      | 19.05 (13)      | 7.26 (10)       | -0.38 (10)      | -0.45 (10)      |
| Cl1  | 13.0 (2)        | 23.7 (2)        | 23.8 (2)        | 9.60 (17)       | 4.68 (16)       | 2.93 (17)       |
| Cl2  | 18.6 (2)        | 18.7 (2)        | 19.72 (19)      | 9.07 (16)       | 1.91 (16)       | 1.02 (17)       |
| Cl4  | 22.4 (2)        | 14.7 (2)        | 25.2 (2)        | 8.81 (17)       | 1.55 (17)       | 2.30 (17)       |
| Cl3  | 22.4 (2)        | 23.8 (2)        | 50.6 (3)        | 17.4 (2)        | -12.8 (2)       | -6.7 (2)        |
| N4   | 19.8 (8)        | 15.2 (7)        | 17.4 (7)        | 6.5 (6)         | 5.5 (6)         | 3.4 (6)         |
| N8   | 15.7 (7)        | 16.9 (7)        | 24.5 (7)        | 10.4 (6)        | 0.4 (6)         | 0.7 (6)         |
| N1   | 14.1 (7)        | 14.2 (7)        | 19.6 (7)        | 3.9 (6)         | 3.9 (6)         | 0.4 (6)         |
| N3   | 18.1 (8)        | 16.8 (7)        | 18.6 (7)        | 6.3 (6)         | 6.9 (6)         | 3.5 (6)         |
| N6   | 18.9 (8)        | 14.6 (7)        | 16.9 (7)        | 5.9 (6)         | 1.2 (6)         | 1.0 (6)         |
| N2   | 15.5 (7)        | 14.5 (7)        | 18.5 (7)        | 4.0 (6)         | 4.8 (6)         | 2.2 (6)         |
| N5   | 28.0 (9)        | 16.8 (7)        | 15.4 (7)        | 5.8 (6)         | 3.5 (6)         | 0.6 (6)         |
| N7   | 25.6 (8)        | 17.1 (8)        | 31.1 (8)        | 12.3 (6)        | 13.7 (7)        | 4.9 (7)         |

**Table S32 Anisotropic Displacement Parameters ( $\text{\AA}^2 \times 10^3$ ) for [Mn(L9)Cl<sub>2</sub>]. The Anisotropic displacement factor exponent takes the form:  $-2\pi^2[h^2a^{*2}U_{11}+2hka^*b^*U_{12}+\dots]$ .**

| Atom | U <sub>11</sub> | U <sub>22</sub> | U <sub>33</sub> | U <sub>23</sub> | U <sub>13</sub> | U <sub>12</sub> |
|------|-----------------|-----------------|-----------------|-----------------|-----------------|-----------------|
| C7   | 25.7 (10)       | 21.0 (9)        | 14.9 (8)        | 7.5 (7)         | 4.2 (7)         | 4.6 (8)         |
| C6   | 25.0 (10)       | 21.3 (9)        | 22.9 (9)        | 11.2 (7)        | 6.8 (7)         | 10.2 (8)        |
| C3   | 16.7 (9)        | 18.7 (9)        | 19.4 (8)        | 3.7 (7)         | 2.6 (7)         | -1.1 (7)        |
| C11  | 17.0 (9)        | 16.5 (9)        | 21.3 (8)        | 4.2 (7)         | 5.4 (7)         | 0.7 (7)         |
| C5   | 26.5 (10)       | 16.9 (9)        | 24.8 (9)        | 7.8 (7)         | 8.7 (8)         | 8.7 (8)         |
| C23  | 32.8 (11)       | 20.5 (9)        | 14.4 (8)        | 5.7 (7)         | -3.1 (7)        | 1.0 (8)         |
| C30  | 23.0 (10)       | 12.8 (8)        | 23.5 (9)        | 7.0 (7)         | 2.9 (7)         | -1.0 (7)        |
| C14  | 26.1 (10)       | 22.6 (9)        | 20.9 (9)        | 9.1 (7)         | 10.9 (7)        | 6.4 (8)         |
| C29  | 24.6 (10)       | 14.9 (9)        | 19.0 (8)        | 3.7 (7)         | 1.2 (7)         | -3.0 (7)        |
| C10  | 27.9 (10)       | 17.6 (9)        | 21.8 (9)        | 9.5 (7)         | 9.8 (8)         | 1.3 (8)         |
| C4   | 23.1 (10)       | 14.0 (8)        | 19.6 (8)        | 2.0 (7)         | 5.6 (7)         | 0.2 (7)         |
| C9   | 20.5 (9)        | 18.8 (9)        | 21.1 (9)        | 4.8 (7)         | 9.6 (7)         | -2.3 (7)        |
| C8   | 23.4 (10)       | 21.1 (9)        | 17.0 (8)        | 5.4 (7)         | 8.0 (7)         | 1.5 (8)         |
| C27  | 29.3 (11)       | 22.7 (10)       | 25.6 (9)        | 14.9 (8)        | -8.6 (8)        | -2.5 (8)        |
| C2   | 11.8 (8)        | 21.8 (9)        | 27.1 (9)        | 7.9 (7)         | 4.0 (7)         | 3.9 (7)         |
| C22  | 13.2 (9)        | 22.3 (9)        | 26.6 (9)        | 7.4 (8)         | -1.7 (7)        | 0.6 (7)         |
| C28  | 42.2 (12)       | 18.2 (9)        | 17.5 (8)        | 9.7 (7)         | 1.7 (8)         | -1.5 (9)        |
| C12  | 22.2 (10)       | 17.3 (9)        | 22.6 (9)        | 1.5 (7)         | 6.8 (7)         | 0.2 (8)         |
| C21  | 20.3 (10)       | 21.9 (9)        | 26.8 (9)        | 7.6 (8)         | 8.3 (8)         | 0.3 (8)         |
| C1   | 13.0 (9)        | 17.4 (9)        | 29.5 (9)        | 3.6 (7)         | 6.4 (7)         | 3.0 (7)         |
| C26  | 19.6 (10)       | 21.3 (10)       | 49.3 (12)       | 19.7 (9)        | 8.0 (9)         | 7.7 (8)         |
| C25  | 31.6 (11)       | 19.3 (10)       | 47.3 (12)       | 16.5 (9)        | 22.5 (9)        | 11.6 (9)        |
| C15  | 36.9 (12)       | 24.3 (10)       | 26.7 (10)       | 9.4 (8)         | 15.2 (9)        | 12.7 (9)        |
| C16  | 48.8 (13)       | 25.0 (10)       | 25.4 (10)       | 7.3 (8)         | 15.1 (9)        | 11.1 (10)       |
| C24  | 46.3 (13)       | 20.8 (10)       | 18.2 (9)        | 7.4 (7)         | 11.4 (8)        | 5.5 (9)         |
| C31  | 47.4 (13)       | 21.1 (10)       | 21.1 (9)        | 5.4 (8)         | 12.3 (9)        | 6.2 (9)         |
| C13  | 35.1 (12)       | 20.5 (10)       | 34.3 (11)       | 5.0 (8)         | 9.1 (9)         | 4.3 (9)         |
| C32  | 62.9 (16)       | 18.4 (10)       | 25.5 (10)       | 2.7 (8)         | 2.4 (10)        | -0.3 (10)       |
| C34  | 22.6 (19)       | 16 (2)          | 15 (2)          | 4 (2)           | 6 (2)           | -0.1 (14)       |
| C33  | 95 (2)          | 24.9 (11)       | 28.5 (11)       | 5.3 (9)         | -4.7 (12)       | 11.0 (13)       |
| C35  | 28 (3)          | 24 (3)          | 19 (3)          | 8 (2)           | 7 (2)           | 3 (2)           |
| C36  | 29 (3)          | 30 (2)          | 23 (2)          | 9.1 (17)        | 7.9 (17)        | 9 (2)           |
| C34A | 22.6 (19)       | 16 (2)          | 15 (2)          | 4 (2)           | 6 (2)           | -0.1 (14)       |
| C35A | 26 (2)          | 21 (2)          | 23 (2)          | 9.5 (18)        | 5.5 (17)        | 5.8 (17)        |
| C36A | 26 (2)          | 34 (3)          | 30 (2)          | 14 (2)          | 9.4 (17)        | 13 (2)          |

**Table S33 Bond Lengths for [Mn(L9)Cl<sub>2</sub>].**

| Atom Atom | Length/ $\text{\AA}$ | Atom Atom | Length/ $\text{\AA}$ |
|-----------|----------------------|-----------|----------------------|
| Mn1 Cl1   | 2.4325 (5)           | N2 C2     | 1.469 (2)            |
| Mn1 Cl2   | 2.4444 (5)           | N5 C28    | 1.490 (2)            |
| Mn1 N4    | 2.2981 (13)          | N5 C21    | 1.500 (2)            |
| Mn1 N1    | 2.3378 (13)          | N5 C31    | 1.496 (2)            |

**Table S33 Bond Lengths for [Mn(L9)Cl<sub>2</sub>].**

| Atom | Atom | Length/Å    | Atom | Atom | Length/Å  |
|------|------|-------------|------|------|-----------|
| Mn1  | N3   | 2.3242 (14) | N7   | C25  | 1.498 (2) |
| Mn1  | N2   | 2.2706 (14) | N7   | C24  | 1.485 (2) |
| Mn2  | Cl4  | 2.4061 (5)  | N7   | C34  | 1.451 (7) |
| Mn2  | Cl3  | 2.4525 (6)  | N7   | C34A | 1.531 (6) |
| Mn2  | N8   | 2.2873 (14) | C7   | C8   | 1.523 (2) |
| Mn2  | N6   | 2.3138 (14) | C6   | C5   | 1.539 (2) |
| Mn2  | N5   | 2.3510 (14) | C3   | C4   | 1.520 (2) |
| Mn2  | N7   | 2.3786 (15) | C11  | C12  | 1.498 (2) |
| N4   | C7   | 1.470 (2)   | C23  | C24  | 1.536 (3) |
| N4   | C6   | 1.470 (2)   | C30  | C29  | 1.534 (2) |
| N4   | C10  | 1.476 (2)   | C14  | C15  | 1.500 (2) |
| N8   | C30  | 1.474 (2)   | C10  | C9   | 1.535 (2) |
| N8   | C27  | 1.471 (2)   | C27  | C28  | 1.528 (3) |
| N8   | C26  | 1.468 (2)   | C2   | C1   | 1.537 (2) |
| N1   | C11  | 1.485 (2)   | C22  | C21  | 1.514 (2) |
| N1   | C8   | 1.492 (2)   | C12  | C13  | 1.316 (3) |
| N1   | C1   | 1.491 (2)   | C26  | C25  | 1.521 (3) |
| N3   | C5   | 1.491 (2)   | C15  | C16  | 1.310 (3) |
| N3   | C14  | 1.492 (2)   | C31  | C32  | 1.482 (3) |
| N3   | C4   | 1.494 (2)   | C32  | C33  | 1.321 (3) |
| N6   | C23  | 1.465 (2)   | C34  | C35  | 1.508 (7) |
| N6   | C29  | 1.479 (2)   | C35  | C36  | 1.309 (6) |
| N6   | C22  | 1.468 (2)   | C34A | C35A | 1.514 (6) |
| N2   | C3   | 1.470 (2)   | C35A | C36A | 1.305 (6) |
| N2   | C9   | 1.480 (2)   |      |      |           |

**Table S34 Bond Angles for [Mn(L9)Cl<sub>2</sub>].**

| Atom | Atom | Atom | Angle/°     | Atom | Atom | Atom | Angle/°     |
|------|------|------|-------------|------|------|------|-------------|
| Cl1  | Mn1  | Cl2  | 95.513 (16) | C23  | N6   | C22  | 114.20 (13) |
| N4   | Mn1  | Cl1  | 93.95 (4)   | C29  | N6   | Mn2  | 116.15 (10) |
| N4   | Mn1  | Cl2  | 170.54 (4)  | C22  | N6   | Mn2  | 100.54 (10) |
| N4   | Mn1  | N1   | 78.18 (5)   | C22  | N6   | C29  | 112.25 (13) |
| N4   | Mn1  | N3   | 73.74 (5)   | C3   | N2   | Mn1  | 100.11 (9)  |
| N1   | Mn1  | Cl1  | 98.11 (4)   | C3   | N2   | C9   | 112.85 (13) |
| N1   | Mn1  | Cl2  | 100.46 (4)  | C9   | N2   | Mn1  | 117.03 (10) |
| N3   | Mn1  | Cl1  | 104.70 (4)  | C2   | N2   | Mn1  | 101.43 (10) |
| N3   | Mn1  | Cl2  | 103.72 (4)  | C2   | N2   | C3   | 113.35 (13) |
| N3   | Mn1  | N1   | 144.69 (5)  | C2   | N2   | C9   | 111.23 (13) |
| N2   | Mn1  | Cl1  | 167.40 (4)  | C28  | N5   | Mn2  | 106.46 (10) |
| N2   | Mn1  | Cl2  | 95.73 (4)   | C28  | N5   | C21  | 111.45 (14) |
| N2   | Mn1  | N4   | 74.86 (5)   | C28  | N5   | C31  | 111.15 (13) |
| N2   | Mn1  | N1   | 74.23 (5)   | C21  | N5   | Mn2  | 106.76 (9)  |
| N2   | Mn1  | N3   | 78.08 (5)   | C31  | N5   | Mn2  | 113.47 (11) |

**Table S34 Bond Angles for [Mn(L9)Cl2].**

| Atom Atom Atom |     |     | Angle/°     | Atom Atom Atom |      |      | Angle/°     |
|----------------|-----|-----|-------------|----------------|------|------|-------------|
| Cl4            | Mn2 | Cl3 | 98.584 (19) | C31            | N5   | C21  | 107.52 (14) |
| N8             | Mn2 | Cl4 | 166.87 (4)  | C25            | N7   | Mn2  | 105.67 (10) |
| N8             | Mn2 | Cl3 | 94.05 (4)   | C25            | N7   | C34A | 109.8 (3)   |
| N8             | Mn2 | N6  | 74.15 (5)   | C24            | N7   | Mn2  | 107.65 (10) |
| N8             | Mn2 | N5  | 74.50 (5)   | C24            | N7   | C25  | 113.27 (15) |
| N8             | Mn2 | N7  | 77.58 (5)   | C24            | N7   | C34A | 118.6 (2)   |
| N6             | Mn2 | Cl4 | 93.87 (4)   | C34            | N7   | Mn2  | 115.2 (3)   |
| N6             | Mn2 | Cl3 | 165.31 (4)  | C34            | N7   | C25  | 112.8 (4)   |
| N6             | Mn2 | N5  | 77.55 (5)   | C34            | N7   | C24  | 102.3 (3)   |
| N6             | Mn2 | N7  | 73.09 (5)   | C34A           | N7   | Mn2  | 100.2 (2)   |
| N5             | Mn2 | Cl4 | 97.99 (4)   | N4             | C7   | C8   | 111.47 (14) |
| N5             | Mn2 | Cl3 | 108.19 (4)  | N4             | C6   | C5   | 111.52 (14) |
| N5             | Mn2 | N7  | 143.88 (5)  | N2             | C3   | C4   | 110.23 (14) |
| N7             | Mn2 | Cl4 | 104.46 (4)  | N1             | C11  | C12  | 116.24 (13) |
| N7             | Mn2 | Cl3 | 96.13 (4)   | N3             | C5   | C6   | 113.04 (13) |
| C7             | N4  | Mn1 | 99.38 (9)   | N6             | C23  | C24  | 110.99 (14) |
| C7             | N4  | C10 | 112.95 (13) | N8             | C30  | C29  | 112.98 (13) |
| C6             | N4  | Mn1 | 101.32 (9)  | N3             | C14  | C15  | 115.33 (14) |
| C6             | N4  | C7  | 114.06 (14) | N6             | C29  | C30  | 113.61 (14) |
| C6             | N4  | C10 | 112.00 (13) | N4             | C10  | C9   | 113.67 (14) |
| C10            | N4  | Mn1 | 116.10 (10) | N3             | C4   | C3   | 112.83 (14) |
| C30            | N8  | Mn2 | 117.56 (10) | N2             | C9   | C10  | 113.21 (14) |
| C27            | N8  | Mn2 | 100.05 (10) | N1             | C8   | C7   | 113.35 (13) |
| C27            | N8  | C30 | 111.15 (13) | N8             | C27  | C28  | 112.00 (14) |
| C26            | N8  | Mn2 | 100.31 (10) | N2             | C2   | C1   | 111.04 (14) |
| C26            | N8  | C30 | 112.51 (14) | N6             | C22  | C21  | 110.78 (14) |
| C26            | N8  | C27 | 114.45 (14) | N5             | C28  | C27  | 114.21 (14) |
| C11            | N1  | Mn1 | 106.06 (9)  | C13            | C12  | C11  | 123.91 (17) |
| C11            | N1  | C8  | 111.85 (13) | N5             | C21  | C22  | 113.50 (14) |
| C11            | N1  | C1  | 111.04 (13) | N1             | C1   | C2   | 113.87 (13) |
| C8             | N1  | Mn1 | 106.67 (9)  | N8             | C26  | C25  | 111.18 (15) |
| C1             | N1  | Mn1 | 107.22 (9)  | N7             | C25  | C26  | 113.99 (15) |
| C1             | N1  | C8  | 113.51 (13) | C16            | C15  | C14  | 123.32 (18) |
| C5             | N3  | Mn1 | 108.69 (10) | N7             | C24  | C23  | 114.10 (14) |
| C5             | N3  | C14 | 112.23 (13) | C32            | C31  | N5   | 113.75 (17) |
| C5             | N3  | C4  | 112.61 (13) | C33            | C32  | C31  | 123.5 (2)   |
| C14            | N3  | Mn1 | 105.19 (10) | N7             | C34  | C35  | 117.6 (5)   |
| C14            | N3  | C4  | 110.88 (13) | C36            | C35  | C34  | 123.0 (5)   |
| C4             | N3  | Mn1 | 106.79 (9)  | C35A           | C34A | N7   | 115.8 (4)   |
| C23            | N6  | Mn2 | 101.34 (10) | C36A           | C35A | C34A | 129.9 (4)   |
| C23            | N6  | C29 | 111.58 (13) |                |      |      |             |

**Table S35 Torsion Angles for [Mn(L9)Cl<sub>2</sub>].**

| A      | B    | C    | D   | Angle/°     | A   | B       | C    | D | Angle/°     |
|--------|------|------|-----|-------------|-----|---------|------|---|-------------|
| Mn1 N4 | C7   | C8   |     | 59.84 (14)  | C11 | N1 C8   | C7   |   | 101.50 (16) |
| Mn1 N4 | C6   | C5   |     | -57.60 (15) | C11 | N1 C1   | C2   |   | 124.70 (15) |
| Mn1 N4 | C10  | C9   |     | -19.62 (17) | C5  | N3 C14  | C15  |   | 64.6 (2)    |
| Mn1 N1 | C11  | C12  |     | 176.59 (12) | C5  | N3 C4   | C3   |   | 134.52 (14) |
| Mn1 N1 | C8   | C7   |     | 14.05 (16)  | C23 | N6 C29  | C30  |   | 136.15 (15) |
| Mn1 N1 | C1   | C2   |     | 9.25 (16)   | C23 | N6 C22  | C21  |   | 167.19 (14) |
| Mn1 N3 | C5   | C6   |     | 9.94 (17)   | C30 | N8 C27  | C28  |   | -66.16 (18) |
| Mn1 N3 | C14  | C15  |     | 177.40 (13) | C30 | N8 C26  | C25  |   | 65.20 (18)  |
| Mn1 N3 | C4   | C3   |     | 15.29 (15)  | C14 | N3 C5   | C6   |   | 125.87 (16) |
| Mn1 N2 | C3   | C4   |     | 60.64 (14)  | C14 | N3 C4   | C3   |   | -98.79 (16) |
| Mn1 N2 | C9   | C10  |     | -20.35 (17) | C29 | N6 C23  | C24  |   | -64.72 (18) |
| Mn1 N2 | C2   | C1   |     | -58.23 (14) | C29 | N6 C22  | C21  |   | 64.53 (18)  |
| Mn2 N8 | C30  | C29  |     | 20.97 (17)  | C10 | N4 C7   | C8   |   | -63.82 (18) |
| Mn2 N8 | C27  | C28  |     | 58.76 (15)  | C10 | N4 C6   | C5   |   | 66.79 (17)  |
| Mn2 N8 | C26  | C25  |     | -60.56 (15) | C4  | N3 C5   | C6   |   | 108.17 (16) |
| Mn2 N6 | C23  | C24  |     | 59.53 (14)  | C4  | N3 C14  | C15  |   | -62.32 (19) |
| Mn2 N6 | C29  | C30  |     | 20.69 (18)  | C9  | N2 C3   | C4   |   | -64.54 (17) |
| Mn2 N6 | C22  | C21  |     | -59.56 (14) | C9  | N2 C2   | C1   |   | 66.94 (18)  |
| Mn2 N5 | C28  | C27  |     | -9.23 (17)  | C8  | N1 C11  | C12  |   | -67.49 (18) |
| Mn2 N5 | C21  | C22  |     | -16.85 (17) | C8  | N1 C1   | C2   |   | 108.28 (16) |
| Mn2 N5 | C31  | C32  |     | -59.92 (18) | C27 | N8 C30  | C29  |   | 135.35 (15) |
| Mn2 N7 | C25  | C26  |     | -13.10 (18) | C27 | N8 C26  | C25  |   | 166.67 (15) |
| Mn2 N7 | C24  | C23  |     | -7.69 (17)  | C2  | N2 C3   | C4   |   | 167.87 (14) |
| Mn2 N7 | C34  | C35  |     | -176.0 (4)  | C2  | N2 C9   | C10  |   | 136.26 (15) |
| Mn2 N7 | C34A | C35A |     | 179.8 (4)   | C22 | N6 C23  | C24  |   | 166.66 (14) |
| N4     | C7   | C8   | N1  | -53.38 (19) | C22 | N6 C29  | C30  |   | -94.21 (17) |
| N4     | C6   | C5   | N3  | 33.0 (2)    | C28 | N5 C21  | C22  |   | 132.71 (15) |
| N4     | C10  | C9   | N2  | 25.7 (2)    | C28 | N5 C31  | C32  |   | 60.0 (2)    |
| N8     | C30  | C29  | N6  | -26.7 (2)   | C21 | N5 C28  | C27  |   | 106.82 (17) |
| N8     | C27  | C28  | N5  | -34.4 (2)   | C21 | N5 C31  | C32  |   | 177.74 (15) |
| N8     | C26  | C25  | N7  | 52.6 (2)    | C1  | N1 C11  | C12  |   | 60.44 (18)  |
| N1     | C11  | C12  | C13 | -122.2 (2)  | C1  | N1 C8   | C7   |   | 131.90 (15) |
| N3     | C14  | C15  | C16 | 111.8 (2)   | C26 | N8 C30  | C29  |   | -94.80 (17) |
| N6     | C23  | C24  | N7  | -35.7 (2)   | C26 | N8 C27  | C28  |   | 165.03 (15) |
| N6     | C22  | C21  | N5  | 54.89 (19)  | C25 | N7 C24  | C23  |   | 108.75 (16) |
| N2     | C3   | C4   | N3  | -54.13 (18) | C25 | N7 C34  | C35  |   | 62.5 (6)    |
| N2     | C2   | C1   | N1  | 33.46 (19)  | C25 | N7 C34A | C35A |   | 68.9 (5)    |

Table S35 Torsion Angles for [Mn(L9)Cl<sub>2</sub>].

| A  | B    | C    | D    | Angle/°     | A    | B  | C    | D    | Angle/°     |
|----|------|------|------|-------------|------|----|------|------|-------------|
| N5 | C31  | C32  | C33  | -124.9 (2)  | C24  | N7 | C25  | C26  | 130.70 (17) |
| N7 | C34  | C35  | C36  | -147.1 (5)  | C24  | N7 | C34  | C35  | -59.5 (6)   |
| N7 | C34A | C35A | C36A | 2.3 (8)     | C24  | N7 | C34A | C35A | -63.6 (6)   |
| C7 | N4   | C6   | C5   | 163.35 (14) | C31  | N5 | C28  | C27  | 133.26 (16) |
| C7 | N4   | C10  | C9   | 94.24 (17)  | C31  | N5 | C21  | C22  | 105.24 (16) |
| C6 | N4   | C7   | C8   | 166.79 (14) | C34  | N7 | C25  | C26  | 113.6 (3)   |
| C6 | N4   | C10  | C9   | 135.32 (15) | C34  | N7 | C24  | C23  | -129.5 (3)  |
| C3 | N2   | C9   | C10  | 95.05 (17)  | C34A | N7 | C25  | C26  | 94.1 (2)    |
| C3 | N2   | C2   | C1   | 164.63 (14) | C34A | N7 | C24  | C23  | -120.3 (3)  |

Table S36 Hydrogen Atom Coordinates (Å×10<sup>4</sup>) and Isotropic Displacement Parameters (Å<sup>2</sup>×10<sup>3</sup>) for [Mn(L9)Cl<sub>2</sub>].

| Atom | x        | y        | z        | U(eq) |
|------|----------|----------|----------|-------|
| H7A  | 9423.64  | 8616.64  | 9496.39  | 24    |
| H7B  | 8368.5   | 7939.58  | 9932.81  | 24    |
| H6A  | 9089.32  | 6215.1   | 8816.83  | 26    |
| H6B  | 10090.51 | 7170.78  | 8594.04  | 26    |
| H3A  | 5256.8   | 7367.86  | 6584.33  | 23    |
| H3B  | 3903.15  | 6574.2   | 6793.69  | 23    |
| H11A | 7832.63  | 10765.83 | 8620.88  | 22    |
| H11B | 9037.19  | 10543.6  | 9266.97  | 22    |
| H5A  | 9650.69  | 5865.73  | 7412.45  | 26    |
| H5B  | 7953.55  | 5341.66  | 7557.29  | 26    |
| H23A | 911.49   | 2897.29  | 5613.89  | 28    |
| H23B | 60.12    | 1697.42  | 5104.01  | 28    |
| H30A | 878.6    | 364.04   | 7194.23  | 24    |
| H30B | 1960.99  | -223.12  | 6579.89  | 24    |
| H14A | 9792.71  | 7027.85  | 6652.44  | 26    |
| H14B | 8160.22  | 7100.44  | 6173.48  | 26    |
| H29A | 978.06   | 370.5    | 5631.65  | 25    |
| H29B | -528.31  | 393.46   | 6095.26  | 25    |
| H10A | 6095.55  | 6746.12  | 9252.8   | 26    |
| H10B | 6272.5   | 5958.16  | 8405.08  | 26    |
| H4A  | 5779.31  | 5610.99  | 7140.47  | 24    |
| H4B  | 5980.27  | 5667.5   | 6274.89  | 24    |
| H9A  | 4016.92  | 6444.44  | 8045.8   | 25    |
| H9B  | 4380.54  | 7563.56  | 8749.99  | 25    |
| H8A  | 6163.3   | 8709.15  | 9699.4   | 25    |
| H8B  | 7645.54  | 9663.9   | 10105.05 | 25    |
| H27A | 4106.91  | 2061.87  | 8331.01  | 31    |

**Table S36 Hydrogen Atom Coordinates ( $\text{\AA}\times 10^4$ ) and Isotropic Displacement Parameters ( $\text{\AA}^2\times 10^3$ ) for  $[\text{Mn}(\text{L9})\text{Cl}_2]$ .**

| Atom | x       | y        | z        | U(eq) |
|------|---------|----------|----------|-------|
| H27B | 3126.7  | 889.72   | 8211.18  | 31    |
| H2A  | 3390.63 | 8406.98  | 7842.66  | 24    |
| H2B  | 4756.7  | 8917.84  | 7444.16  | 24    |
| H22A | -1614.5 | 1912.9   | 6331.4   | 26    |
| H22B | -508.96 | 3079.42  | 6666.28  | 26    |
| H28A | 814.46  | 1478.94  | 8376.47  | 31    |
| H28B | 2041.25 | 2487.86  | 8968.56  | 31    |
| H12  | 7447.31 | 11389.88 | 10262.19 | 26    |
| H21A | -1338.1 | 2594.03  | 7732.16  | 28    |
| H21B | -700.85 | 1481.71  | 7443.38  | 28    |
| H1A  | 5111.12 | 10181.14 | 8642.16  | 25    |
| H1B  | 4599.78 | 9326.68  | 9080.83  | 25    |
| H26A | 4634.72 | 380.87   | 6910.07  | 33    |
| H26B | 5350.42 | 1642.08  | 7221.48  | 33    |
| H25A | 5384.95 | 1030.4   | 5865.04  | 35    |
| H25B | 3548.43 | 474.6    | 5700.98  | 35    |
| H15  | 9335.02 | 5122.38  | 5983.72  | 33    |
| H16A | 7325.51 | 5745.69  | 4951.29  | 38    |
| H16B | 8013.8  | 4608.74  | 4753.2   | 38    |
| H24A | 2394.37 | 1109.36  | 4945.13  | 33    |
| H24B | 2860.19 | 2309.11  | 4921.71  | 33    |
| H31A | 437.23  | 4250.75  | 8247     | 36    |
| H31B | 68.51   | 3655.96  | 8882.05  | 36    |
| H13A | 7001.69 | 12423.45 | 9134.03  | 37    |
| H13B | 6737.63 | 12864.25 | 10066.41 | 37    |
| H32  | 3254.6  | 4618.56  | 8832.19  | 45    |
| H34A | 6053.54 | 2958.29  | 6127.25  | 22    |
| H34B | 4754.56 | 3418.1   | 5685.26  | 22    |
| H33A | 1616.83 | 4616.44  | 10105.86 | 61    |
| H33B | 3479.45 | 5183.68  | 10158.22 | 61    |
| H35  | 4948.07 | 1762.07  | 4503.54  | 28    |
| H36A | 7945.44 | 2958.48  | 5227.29  | 32    |
| H36B | 7481.01 | 2137.53  | 4312.81  | 32    |
| H34C | 5024.47 | 3614.77  | 6006.24  | 22    |
| H34D | 6059.26 | 3026.35  | 6477.8   | 22    |
| H35A | 7255.01 | 3118.17  | 5347.68  | 27    |
| H36C | 5112.69 | 1246.92  | 4577.56  | 33    |
| H36D | 6757.43 | 1706.26  | 4289.88  | 33    |

**Table S37 Atomic Occupancy for  $[\text{Mn}(\text{L9})\text{Cl}_2]$ .**

| Atom | Occupancy | Atom | Occupancy | Atom | Occupancy |
|------|-----------|------|-----------|------|-----------|
| C34  | 0.471 (5) | H34A | 0.471 (5) | H34B | 0.471 (5) |



**Table S37 Atomic Occupancy for [Mn(L9)Cl2].**

| Atom | Occupancy | Atom | Occupancy | Atom | Occupancy |
|------|-----------|------|-----------|------|-----------|
| C35  | 0.471 (5) | H35  | 0.471 (5) | C36  | 0.471 (5) |
| H36A | 0.471 (5) | H36B | 0.471 (5) | C34A | 0.529 (5) |
| H34C | 0.529 (5) | H34D | 0.529 (5) | C35A | 0.529 (5) |
| H35A | 0.529 (5) | C36A | 0.529 (5) | H36C | 0.529 (5) |
| H36D | 0.529 (5) |      |           |      |           |

**Experimental**

Single crystals of  $C_{16}H_{30}Cl_2MnN_4$  **[[Mn(L9)Cl2]]** were **[[1]]**. A suitable crystal was selected and **[[1]]** on a **Bruker PHOTON100 CMOS** diffractometer. The crystal was kept at 120 K during data collection. Using Olex2 [1], the structure was solved with the SHELXT [2] structure solution program using Intrinsic Phasing and refined with the SHELXL [3] refinement package using Least Squares minimisation.

1. Dolomanov, O.V., Bourhis, L.J., Gildea, R.J., Howard, J.A.K. & Puschmann, H. (2009), J. Appl. Cryst. 42, 339-341.
2. Sheldrick, G.M. (2015). Acta Cryst. A71, 3-8.
3. Sheldrick, G.M. (2015). Acta Cryst. C71, 3-8.

**Crystal structure determination of **[[Mn(L9)Cl2]]****

**Crystal Data** for  $C_{16}H_{30}Cl_2MnN_4$  ( $M=404.28$  g/mol): triclinic, space group P-1 (no. 2),  $a = 8.5540(11)$  Å,  $b = 13.2482(17)$  Å,  $c = 17.920(2)$  Å,  $\alpha = 107.492(2)^\circ$ ,  $\beta = 95.600(2)^\circ$ ,  $\gamma = 97.994(2)^\circ$ ,  $V = 1897.0(4)$  Å<sup>3</sup>,  $Z = 4$ ,  $T = 120$  K,  $\mu(\text{synchrotron}) = 0.982$  mm<sup>-1</sup>,  $D_{\text{calc}} = 1.416$  g/cm<sup>3</sup>, 29491 reflections measured ( $2.41^\circ \leq 2\theta \leq 56.584^\circ$ ), 9415 unique ( $R_{\text{int}} = 0.0370$ ,  $R_{\text{sigma}} = 0.0433$ ) which were used in all calculations. The final  $R_1$  was 0.0307 ( $I > 2\sigma(I)$ ) and  $wR_2$  was 0.0645 (all data).

**Refinement model description**

Number of restraints - 41, number of constraints - unknown.

**Details:**

1. Fixed Uiso  
At 1.2 times of:  
All C(H) groups, All C(H,H) groups
2. Restrained distances  
N7-C34  $\approx$  N7-C34A  
with sigma of 0.02  
C34-C35  $\approx$  C34A-C35A  
with sigma of 0.02  
C35-C36  $\approx$  C35A-C36A  
with sigma of 0.02  
N7-C35  $\approx$  N7-C35A  
with sigma of 0.04  
C34-C36  $\approx$  C34A-C36A  
with sigma of 0.04
3. Uiso/Uanis restraints and constraints  
C35A  $\approx$  C35: within 2A with sigma of 0.04 and sigma for terminal atoms of 0.08 within 2A  
C36A  $\approx$  C36: within 2A with sigma of 0.04 and sigma for terminal atoms of 0.08 within 2A  
C34  $\approx$  C34A: within 2A with sigma of 0.04 and sigma for terminal atoms of 0.08 within 2A  
Uanis(C34) = Uanis(C34A)
4. Rigid body (RIGU) restrains  
N7, C34A, C34, C35A, C35  
with sigma for 1-2 distances of 0.004 and sigma for 1-3 distances of 0.004
5. Others  
Sof(C34A)=Sof(H34C)=Sof(H34D)=Sof(C35A)=Sof(H35A)=Sof(C36A)=Sof(H36C)=  
Sof(H36D)=1-FVAR(1)  
Sof(C34)=Sof(H34A)=Sof(H34B)=Sof(C35)=Sof(H35)=Sof(C36)=Sof(H36A)=Sof(H36B)=  
FVAR(1)
- 6.a Secondary CH2 refined with riding coordinates:  
C7(H7A,H7B), C6(H6A,H6B), C3(H3A,H3B), C11(H11A,H11B), C5(H5A,H5B), C23(H23A,H23B), C30(H30A,H30B), C14(H14A,H14B), C29(H29A,H29B), C10(H10A,H10B), C4(H4A,H4B), C9(H9A,H9B), C8(H8A,H8B), C27(H27A,H27B), C2(H2A,H2B), C22(H22A,H22B), C28(H28A,H28B), C21(H21A,H21B), C1(H1A,H1B), C26(H26A,H26B), C25(H25A,H25B), C24(H24A,H24B), C31(H31A,H31B), C34(H34A,H34B), C34A(H34C,H34D)
- 6.b Aromatic/amide H refined with riding coordinates:  
C12(H12), C15(H15), C32(H32), C35(H35), C35A(H35A)

6.c X=CH2 refined with riding coordinates:

C16 (H16A, H16B), C13 (H13A, H13B), C33 (H33A, H33B), C36 (H36A, H36B), C36A (H36C, H36D)

This report has been created with Olex2, compiled on 2020.11.12 svn.r5f609507 for OlexSys. Please [let us know](#) if there are any errors or if you would like to have additional features.

# [Mn(L11)Cl<sub>2</sub>]

**Table S38 Crystal data and structure refinement for [Mn(L11)Cl<sub>2</sub>].**

|                                             |                                                                  |
|---------------------------------------------|------------------------------------------------------------------|
| Identification code                         | [Mn(L11)Cl <sub>2</sub> ]                                        |
| Empirical formula                           | C <sub>20</sub> H <sub>32</sub> Cl <sub>2</sub> MnN <sub>4</sub> |
| Formula weight                              | 454.33                                                           |
| Temperature/K                               | 120                                                              |
| Crystal system                              | monoclinic                                                       |
| Space group                                 | P2 <sub>1</sub> /c                                               |
| a/Å                                         | 8.4238(4)                                                        |
| b/Å                                         | 13.5803(6)                                                       |
| c/Å                                         | 18.6065(8)                                                       |
| α/°                                         | 90                                                               |
| β/°                                         | 98.507(2)                                                        |
| γ/°                                         | 90                                                               |
| Volume/Å <sup>3</sup>                       | 2105.12(16)                                                      |
| Z                                           | 4                                                                |
| ρ <sub>calc</sub> /g/cm <sup>3</sup>        | 1.434                                                            |
| μ/mm <sup>-1</sup>                          | 0.894                                                            |
| F(000)                                      | 956.0                                                            |
| Crystal size/mm <sup>3</sup>                | 0.253 × 0.169 × 0.078                                            |
| Radiation                                   | MoKα (λ = 0.71073)                                               |
| 2θ range for data collection/°              | 3.728 to 56.632                                                  |
| Index ranges                                | -11 ≤ h ≤ 11, -18 ≤ k ≤ 18, -24 ≤ l ≤ 24                         |
| Reflections collected                       | 49812                                                            |
| Independent reflections                     | 5246 [R <sub>int</sub> = 0.0340, R <sub>sigma</sub> = 0.0172]    |
| Data/restraints/parameters                  | 5246/0/244                                                       |
| Goodness-of-fit on F <sup>2</sup>           | 1.089                                                            |
| Final R indexes [I >= 2σ (I)]               | R <sub>1</sub> = 0.0264, wR <sub>2</sub> = 0.0603                |
| Final R indexes [all data]                  | R <sub>1</sub> = 0.0294, wR <sub>2</sub> = 0.0615                |
| Largest diff. peak/hole / e Å <sup>-3</sup> | 0.39/-0.22                                                       |

**Table S39 Fractional Atomic Coordinates (×10<sup>4</sup>) and Equivalent Isotropic Displacement Parameters (Å<sup>2</sup>×10<sup>3</sup>) for [Mn(L11)Cl<sub>2</sub>]. U<sub>eq</sub> is defined as 1/3 of the trace of the orthogonalised U<sub>ij</sub> tensor.**

| Atom | x           | y          | z          | U(eq)     |
|------|-------------|------------|------------|-----------|
| Mn1  | 7108.9 (2)  | 6394.4 (2) | 2445.8 (2) | 10.13 (5) |
| Cl1  | 8299.3 (4)  | 4838.3 (2) | 2883.6 (2) | 18.20 (7) |
| Cl2  | 4613.5 (4)  | 5716.2 (2) | 1763.8 (2) | 16.51 (7) |
| N4   | 6614.9 (12) | 7986.9 (8) | 2086.8 (6) | 12.7 (2)  |
| N1   | 5879.5 (12) | 7055.5 (8) | 3426.7 (6) | 12.7 (2)  |

**Table S39 Fractional Atomic Coordinates ( $\times 10^4$ ) and Equivalent Isotropic Displacement Parameters ( $\text{\AA}^2 \times 10^3$ ) for [Mn(L11)Cl<sub>2</sub>].  $U_{eq}$  is defined as 1/3 of the trace of the orthogonalised  $U_{ij}$  tensor.**

| Atom | x            | y           | z          | U(eq)    |
|------|--------------|-------------|------------|----------|
| N2   | 9036.8 (13)  | 7331.2 (8)  | 3147.0 (6) | 13.5 (2) |
| N3   | 8947.1 (13)  | 6761.0 (8)  | 1617.2 (6) | 13.9 (2) |
| C6   | 6535.5 (16)  | 7865.7 (10) | 1294.3 (7) | 15.7 (2) |
| C12  | 3848.6 (15)  | 6467.6 (10) | 4248.9 (7) | 15.1 (2) |
| C11  | 4682.6 (15)  | 6316.8 (9)  | 3582.1 (7) | 14.3 (2) |
| C10  | 7787.3 (16)  | 8750.1 (9)  | 2383.2 (7) | 15.8 (2) |
| C7   | 5028.6 (15)  | 8136.8 (10) | 2315.9 (7) | 15.2 (2) |
| C2   | 8881.0 (15)  | 6989.8 (11) | 3884.0 (7) | 17.1 (3) |
| C9   | 8865.3 (16)  | 8414.0 (10) | 3083.3 (7) | 16.3 (3) |
| C5   | 8144.4 (16)  | 7509.3 (10) | 1095.9 (7) | 17.3 (3) |
| C8   | 5113.4 (15)  | 8006.5 (9)  | 3136.5 (7) | 15.5 (2) |
| C4   | 10423.8 (15) | 7170.8 (10) | 2072.0 (7) | 16.9 (3) |
| C13  | 3741.1 (16)  | 7358.6 (11) | 4610.7 (7) | 19.1 (3) |
| C18  | 9427.2 (17)  | 5879.7 (10) | 1218.1 (8) | 19.3 (3) |
| C3   | 10499.8 (15) | 6973.4 (10) | 2885.6 (7) | 16.9 (3) |
| C14  | 2935.5 (17)  | 7416.1 (12) | 5215.0 (8) | 22.3 (3) |
| C1   | 7176.2 (16)  | 7186.7 (10) | 4060.6 (7) | 16.5 (3) |
| C15  | 2251.3 (17)  | 6588.5 (12) | 5468.5 (8) | 23.7 (3) |
| C17  | 3117.8 (19)  | 5645.3 (11) | 4504.6 (9) | 26.6 (3) |
| C16  | 2331 (2)     | 5700.2 (12) | 5110.6 (9) | 31.5 (4) |
| C19  | 8016 (2)     | 5347.4 (11) | 812.0 (9)  | 26.9 (3) |
| C20  | 7787 (2)     | 5221.1 (13) | 97.0 (10)  | 36.1 (4) |

**Table S40 Anisotropic Displacement Parameters ( $\text{\AA}^2 \times 10^3$ ) for [Mn(L11)Cl<sub>2</sub>]. The Anisotropic displacement factor exponent takes the form:  $-2\pi^2[h^2a^{*2}U_{11}+2hka^*b^*U_{12}+\dots]$ .**

| Atom | U <sub>11</sub> | U <sub>22</sub> | U <sub>33</sub> | U <sub>23</sub> | U <sub>13</sub> | U <sub>12</sub> |
|------|-----------------|-----------------|-----------------|-----------------|-----------------|-----------------|
| Mn1  | 9.93 (9)        | 8.33 (9)        | 12.41 (9)       | 0.82 (7)        | 2.52 (6)        | -0.02 (6)       |
| Cl1  | 16.20 (15)      | 11.66 (14)      | 27.72 (17)      | 5.75 (12)       | 6.54 (12)       | 2.90 (11)       |
| Cl2  | 16.66 (14)      | 14.88 (14)      | 17.39 (15)      | -0.23 (11)      | 0.55 (11)       | -4.73 (11)      |
| N4   | 11.4 (5)        | 11.4 (5)        | 15.6 (5)        | 1.1 (4)         | 3.0 (4)         | -0.4 (4)        |
| N1   | 11.1 (5)        | 12.6 (5)        | 14.7 (5)        | -0.5 (4)        | 2.9 (4)         | -0.9 (4)        |
| N2   | 10.9 (5)        | 14.1 (5)        | 15.4 (5)        | 0.2 (4)         | 2.3 (4)         | -0.3 (4)        |
| N3   | 16.2 (5)        | 10.7 (5)        | 15.5 (5)        | 1.0 (4)         | 5.1 (4)         | 1.5 (4)         |
| C6   | 18.1 (6)        | 13.4 (6)        | 15.6 (6)        | 5.1 (5)         | 2.1 (5)         | 1.1 (5)         |
| C12  | 13.1 (6)        | 18.3 (6)        | 14.4 (6)        | 1.1 (5)         | 4.1 (5)         | 2.0 (5)         |
| C11  | 14.4 (6)        | 13.6 (6)        | 16.0 (6)        | -1.3 (5)        | 5.5 (5)         | -1.6 (5)        |
| C10  | 15.8 (6)        | 8.9 (5)         | 23.3 (6)        | -0.4 (5)        | 5.0 (5)         | -1.9 (5)        |
| C7   | 10.9 (5)        | 13.3 (6)        | 21.9 (6)        | 3.3 (5)         | 3.8 (5)         | 3.4 (4)         |
| C2   | 12.8 (6)        | 23.2 (7)        | 14.6 (6)        | 0.6 (5)         | -0.2 (5)        | -1.0 (5)        |
| C9   | 14.4 (6)        | 13.7 (6)        | 21.1 (6)        | -3.5 (5)        | 3.6 (5)         | -4.3 (5)        |
| C5   | 22.1 (6)        | 15.1 (6)        | 16.1 (6)        | 4.2 (5)         | 7.2 (5)         | 1.1 (5)         |
| C8   | 13.5 (6)        | 11.7 (6)        | 22.1 (6)        | -1.0 (5)        | 5.6 (5)         | 1.8 (5)         |
| C4   | 12.3 (6)        | 17.1 (6)        | 22.7 (7)        | 0.5 (5)         | 7.1 (5)         | -1.3 (5)        |

**Table S40 Anisotropic Displacement Parameters ( $\text{\AA}^2 \times 10^3$ ) for [Mn(L11)Cl2]. The Anisotropic displacement factor exponent takes the form:  $-2\pi^2[h^2a^{*2}U_{11}+2hka^*b^*U_{12}+\dots]$ .**

| Atom | $U_{11}$  | $U_{22}$ | $U_{33}$ | $U_{23}$  | $U_{13}$ | $U_{12}$ |
|------|-----------|----------|----------|-----------|----------|----------|
| C13  | 18.3 (6)  | 21.0 (7) | 19.0 (6) | -3.3 (5)  | 5.8 (5)  | -2.6 (5) |
| C18  | 24.3 (7)  | 15.0 (6) | 21.2 (7) | -2.1 (5)  | 11.7 (5) | 2.9 (5)  |
| C3   | 9.5 (5)   | 19.0 (6) | 22.1 (6) | 1.3 (5)   | 2.3 (5)  | -0.1 (5) |
| C14  | 18.2 (6)  | 30.1 (8) | 18.6 (6) | -6.6 (6)  | 3.0 (5)  | 2.8 (6)  |
| C1   | 16.2 (6)  | 20.6 (6) | 12.6 (6) | -2.4 (5)  | 1.9 (5)  | -2.5 (5) |
| C15  | 18.8 (7)  | 36.9 (8) | 17.1 (6) | 4.9 (6)   | 7.9 (5)  | 7.9 (6)  |
| C17  | 33.7 (8)  | 17.2 (7) | 33.0 (8) | 2.6 (6)   | 18.9 (7) | 2.8 (6)  |
| C16  | 38.0 (9)  | 25.5 (8) | 36.0 (9) | 12.3 (7)  | 22.4 (7) | 4.4 (7)  |
| C19  | 32.4 (8)  | 19.9 (7) | 30.8 (8) | -8.4 (6)  | 12.2 (6) | -2.1 (6) |
| C20  | 45.7 (10) | 27.6 (9) | 34.1 (9) | -10.7 (7) | 3.6 (8)  | 5.3 (7)  |

**Table S41 Bond Lengths for [Mn(L11)Cl2].**

| Atom Atom | Length/ $\text{\AA}$ | Atom Atom | Length/ $\text{\AA}$ |
|-----------|----------------------|-----------|----------------------|
| Mn1 Cl1   | 2.4276 (4)           | N3 C4     | 1.5038 (17)          |
| Mn1 Cl2   | 2.4674 (4)           | N3 C18    | 1.4954 (16)          |
| Mn1 N4    | 2.2834 (11)          | C6 C5     | 1.5347 (18)          |
| Mn1 N1    | 2.4019 (11)          | C12 C11   | 1.5273 (17)          |
| Mn1 N2    | 2.3090 (11)          | C12 C13   | 1.3941 (19)          |
| Mn1 N3    | 2.3935 (11)          | C12 C17   | 1.3924 (19)          |
| N4 C6     | 1.4754 (16)          | C10 C9    | 1.5427 (19)          |
| N4 C10    | 1.4807 (16)          | C7 C8     | 1.5283 (18)          |
| N4 C7     | 1.4755 (16)          | C2 C1     | 1.5432 (18)          |
| N1 C11    | 1.4808 (16)          | C4 C3     | 1.5295 (19)          |
| N1 C8     | 1.5076 (16)          | C13 C14   | 1.3988 (19)          |
| N1 C1     | 1.4950 (16)          | C18 C19   | 1.497 (2)            |
| N2 C2     | 1.4717 (17)          | C14 C15   | 1.378 (2)            |
| N2 C9     | 1.4806 (17)          | C15 C16   | 1.384 (2)            |
| N2 C3     | 1.4726 (16)          | C17 C16   | 1.392 (2)            |
| N3 C5     | 1.4956 (16)          | C19 C20   | 1.327 (2)            |

**Table S42 Bond Angles for [Mn(L11)Cl2].**

| Atom Atom Atom | Angle/ $^\circ$ | Atom Atom Atom | Angle/ $^\circ$ |
|----------------|-----------------|----------------|-----------------|
| Cl1 Mn1 Cl2    | 97.230 (13)     | C9 N2 Mn1      | 116.74 (8)      |
| N4 Mn1 Cl1     | 166.16 (3)      | C3 N2 Mn1      | 100.64 (8)      |
| N4 Mn1 Cl2     | 95.66 (3)       | C3 N2 C9       | 112.20 (10)     |
| N4 Mn1 N1      | 77.75 (4)       | C5 N3 Mn1      | 106.59 (7)      |
| N4 Mn1 N2      | 74.09 (4)       | C5 N3 C4       | 111.75 (10)     |
| N4 Mn1 N3      | 73.85 (4)       | C4 N3 Mn1      | 105.94 (7)      |
| N1 Mn1 Cl1     | 105.87 (3)      | C18 N3 Mn1     | 113.68 (8)      |
| N1 Mn1 Cl2     | 95.74 (3)       | C18 N3 C5      | 110.56 (10)     |
| N2 Mn1 Cl1     | 93.95 (3)       | C18 N3 C4      | 108.28 (10)     |
| N2 Mn1 Cl2     | 166.11 (3)      | N4 C6 C5       | 111.38 (10)     |

**Table S42 Bond Angles for [Mn(L11)Cl2].**

| Atom Atom Atom |     |     | Angle/°     | Atom Atom Atom |     |     | Angle/°     |
|----------------|-----|-----|-------------|----------------|-----|-----|-------------|
| N2             | Mn1 | N1  | 73.20 (4)   | C13            | C12 | C11 | 125.39 (12) |
| N2             | Mn1 | N3  | 77.37 (4)   | C17            | C12 | C11 | 116.73 (12) |
| N3             | Mn1 | Cl1 | 97.05 (3)   | C17            | C12 | C13 | 117.87 (12) |
| N3             | Mn1 | Cl2 | 109.24 (3)  | N1             | C11 | C12 | 118.43 (11) |
| N3             | Mn1 | N1  | 143.56 (4)  | N4             | C10 | C9  | 112.60 (10) |
| C6             | N4  | Mn1 | 99.56 (7)   | N4             | C7  | C8  | 111.23 (10) |
| C6             | N4  | C10 | 112.29 (10) | N2             | C2  | C1  | 110.97 (10) |
| C10            | N4  | Mn1 | 118.12 (8)  | N2             | C9  | C10 | 113.55 (10) |
| C7             | N4  | Mn1 | 100.36 (7)  | N3             | C5  | C6  | 112.89 (10) |
| C7             | N4  | C6  | 113.26 (10) | N1             | C8  | C7  | 114.29 (10) |
| C7             | N4  | C10 | 112.24 (10) | N3             | C4  | C3  | 113.71 (10) |
| C11            | N1  | Mn1 | 106.12 (7)  | C12            | C13 | C14 | 120.69 (13) |
| C11            | N1  | C8  | 112.49 (10) | N3             | C18 | C19 | 112.59 (11) |
| C11            | N1  | C1  | 111.46 (10) | N2             | C3  | C4  | 110.76 (10) |
| C8             | N1  | Mn1 | 104.95 (7)  | C15            | C14 | C13 | 120.46 (14) |
| C1             | N1  | Mn1 | 107.29 (7)  | N1             | C1  | C2  | 113.93 (10) |
| C1             | N1  | C8  | 113.87 (10) | C14            | C15 | C16 | 119.58 (13) |
| C2             | N2  | Mn1 | 101.58 (8)  | C16            | C17 | C12 | 121.43 (14) |
| C2             | N2  | C9  | 111.49 (10) | C15            | C16 | C17 | 119.94 (14) |
| C2             | N2  | C3  | 113.46 (10) | C20            | C19 | C18 | 123.73 (16) |

**Table S43 Torsion Angles for [Mn(L11)Cl2].**

| A   | B   | C   | D   | Angle/°     | A   | B   | C   | D   | Angle/°     |
|-----|-----|-----|-----|-------------|-----|-----|-----|-----|-------------|
| Mn1 | N4  | C6  | C5  | -62.91 (10) | C10 | N4  | C6  | C5  | 62.94 (13)  |
| Mn1 | N4  | C10 | C9  | -19.55 (13) | C10 | N4  | C7  | C8  | -65.48 (13) |
| Mn1 | N4  | C7  | C8  | 60.85 (11)  | C7  | N4  | C6  | C5  | -           |
| Mn1 | N1  | C11 | C12 | 172.22 (9)  | C7  | N4  | C10 | C9  | 96.49 (12)  |
| Mn1 | N1  | C8  | C7  | 12.34 (12)  | C2  | N2  | C9  | C10 | -           |
| Mn1 | N1  | C1  | C2  | 6.78 (13)   | C2  | N2  | C3  | C4  | 168.30 (11) |
| Mn1 | N2  | C2  | C1  | -60.18 (11) | C9  | N2  | C2  | C1  | 64.86 (14)  |
| Mn1 | N2  | C9  | C10 | -19.68 (13) | C9  | N2  | C3  | C4  | -64.23 (14) |
| Mn1 | N2  | C3  | C4  | 60.60 (11)  | C5  | N3  | C4  | C3  | 131.26 (11) |
| Mn1 | N3  | C5  | C6  | 5.49 (12)   | C5  | N3  | C18 | C19 | -63.67 (15) |
| Mn1 | N3  | C4  | C3  | 15.55 (12)  | C8  | N1  | C11 | C12 | -73.56 (14) |
| Mn1 | N3  | C18 | C19 | 56.16 (13)  | C8  | N1  | C1  | C2  | -           |
| N4  | C6  | C5  | N3  | 39.33 (15)  | C4  | N3  | C5  | C6  | -           |
| N4  | C10 | C9  | N2  | 24.98 (15)  | C4  | N3  | C18 | C19 | 109.82 (12) |
| N4  | C7  | C8  | N1  | -52.12 (14) | C13 | C12 | C11 | N1  | 173.59 (12) |
| N2  | C2  | C1  | N1  | 36.35 (15)  | C13 | C12 | C17 | C16 | 19.76 (19)  |
| N3  | C4  | C3  | N2  | -54.46 (14) | C13 | C14 | C15 | C16 | -1.3 (2)    |
|     |     |     |     |             |     |     |     |     | -1.6 (2)    |

**Table S43 Torsion Angles for [Mn(L11)Cl2].**

| A   | B   | C   | D   | Angle/°     | A   | B   | C   | D   | Angle/°     |
|-----|-----|-----|-----|-------------|-----|-----|-----|-----|-------------|
| N3  | C18 | C19 | C20 | 119.51 (16) | C18 | N3  | C5  | C6  | 129.50 (12) |
| C6  | N4  | C10 | C9  | 134.55 (11) | C18 | N3  | C4  | C3  | 106.74 (12) |
| C6  | N4  | C7  | C8  | 166.06 (10) | C3  | N2  | C2  | C1  | 167.29 (11) |
| C12 | C13 | C14 | C15 | 0.8 (2)     | C3  | N2  | C9  | C10 | 95.72 (13)  |
| C12 | C17 | C16 | C15 | 0.6 (3)     | C14 | C15 | C16 | C17 | 0.9 (2)     |
| C11 | N1  | C8  | C7  | 102.60 (12) | C1  | N1  | C11 | C12 | 55.73 (15)  |
| C11 | N1  | C1  | C2  | 122.56 (12) | C1  | N1  | C8  | C7  | 129.37 (11) |
| C11 | C12 | C13 | C14 | 179.50 (13) | C17 | C12 | C11 | N1  | 161.32 (13) |
| C11 | C12 | C17 | C16 | 179.71 (15) | C17 | C12 | C13 | C14 | 0.6 (2)     |

**Table S44 Hydrogen Atom Coordinates (Å×10<sup>4</sup>) and Isotropic Displacement Parameters (Å<sup>2</sup>×10<sup>3</sup>) for [Mn(L11)Cl2].**

| Atom | x        | y       | z       | U(eq) |
|------|----------|---------|---------|-------|
| H6A  | 6247.1   | 8502.86 | 1050.99 | 19    |
| H6B  | 5686.04  | 7383.64 | 1116.51 | 19    |
| H11A | 5223.27  | 5667.91 | 3631.73 | 17    |
| H11B | 3840.51  | 6278.93 | 3151.29 | 17    |
| H10A | 7200.53  | 9352.46 | 2487.95 | 19    |
| H10B | 8471.81  | 8918.21 | 2011.77 | 19    |
| H7A  | 4254.52  | 7658.45 | 2061.39 | 18    |
| H7B  | 4637.97  | 8807.76 | 2176.99 | 18    |
| H2A  | 9676.05  | 7335.14 | 4241.92 | 21    |
| H2B  | 9111.3   | 6275.32 | 3922.61 | 21    |
| H9A  | 9943.01  | 8710.12 | 3096.05 | 20    |
| H9B  | 8408.83  | 8665.21 | 3508.51 | 20    |
| H5A  | 7960.18  | 7219.75 | 602.22  | 21    |
| H5B  | 8868.32  | 8081.62 | 1085.13 | 21    |
| H8A  | 5727.77  | 8562.74 | 3384.02 | 19    |
| H8B  | 4011.12  | 8038.09 | 3260.13 | 19    |
| H4A  | 10459.47 | 7890.85 | 1992.82 | 20    |
| H4B  | 11384.03 | 6879.7  | 1905.84 | 20    |
| H13  | 4220.09  | 7932.78 | 4445.05 | 23    |
| H18A | 10038.36 | 5421.87 | 1569.77 | 23    |
| H18B | 10144.06 | 6091.88 | 871.03  | 23    |
| H3A  | 10617.9  | 6257.47 | 2978.71 | 20    |
| H3B  | 11449.24 | 7308.61 | 3155.41 | 20    |
| H14  | 2859.56  | 8030.1  | 5452.21 | 27    |
| H1A  | 6969.1   | 6735.46 | 4454.24 | 20    |
| H1B  | 7129.02  | 7868.67 | 4244.21 | 20    |
| H15  | 1728.32  | 6627.21 | 5886.33 | 28    |

**Table S44 Hydrogen Atom Coordinates ( $\text{\AA} \times 10^4$ ) and Isotropic Displacement Parameters ( $\text{\AA}^2 \times 10^3$ ) for  $[\text{Mn}(\text{L11})\text{Cl}_2]$ .**

| Atom | x       | y       | z       | U(eq) |
|------|---------|---------|---------|-------|
| H17  | 3157.28 | 5033.6  | 4260.18 | 32    |
| H16  | 1848.47 | 5128.58 | 5278.33 | 38    |
| H19  | 7239.87 | 5085.14 | 1081.58 | 32    |
| H20A | 8542.56 | 5475.27 | -186.62 | 43    |
| H20B | 6866.88 | 4876.41 | -131.3  | 43    |

### Experimental

Single crystals of  $\text{C}_{20}\text{H}_{32}\text{Cl}_2\text{MnN}_4$   $[[\text{Mn}(\text{L11})\text{Cl}_2]]$  were  $[[\text{Mn}(\text{L11})\text{Cl}_2]]$ . A suitable crystal was selected and  $[[\text{Mn}(\text{L11})\text{Cl}_2]]$  on a **Bruker PHOTON-II** diffractometer. The crystal was kept at 120 K during data collection. Using Olex2 [1], the structure was solved with the SHELXT [2] structure solution program using Intrinsic Phasing and refined with the SHELXL [3] refinement package using Least Squares minimisation.

1. Dolomanov, O.V., Bourhis, L.J., Gildea, R.J., Howard, J.A.K. & Puschmann, H. (2009), J. Appl. Cryst. 42, 339-341.
2. Sheldrick, G.M. (2015). Acta Cryst. A71, 3-8.
3. Sheldrick, G.M. (2015). Acta Cryst. C71, 3-8.

### Crystal structure determination of $[[\text{Mn}(\text{L11})\text{Cl}_2]]$

**Crystal Data** for  $\text{C}_{20}\text{H}_{32}\text{Cl}_2\text{MnN}_4$  ( $M = 454.33$  g/mol): monoclinic, space group  $P2_1/c$  (no. 14),  $a = 8.4238(4)$   $\text{\AA}$ ,  $b = 13.5803(6)$   $\text{\AA}$ ,  $c = 18.6065(8)$   $\text{\AA}$ ,  $\beta = 98.507(2)^\circ$ ,  $V = 2105.12(16)$   $\text{\AA}^3$ ,  $Z = 4$ ,  $T = 120$  K,  $\mu(\text{MoK}\alpha) = 0.894$   $\text{mm}^{-1}$ ,  $D_{\text{calc}} = 1.434$   $\text{g/cm}^3$ , 49812 reflections measured ( $3.728^\circ \leq 2\theta \leq 56.632^\circ$ ), 5246 unique ( $R_{\text{int}} = 0.0340$ ,  $R_{\text{sigma}} = 0.0172$ ) which were used in all calculations. The final  $R_1$  was 0.0264 ( $I > 2\sigma(I)$ ) and  $wR_2$  was 0.0615 (all data).

### Refinement model description

Number of restraints - 0, number of constraints - unknown.

Details:

1. Fixed Uiso

At 1.2 times of:

All C(H) groups, All C(H,H) groups

2.a Secondary CH<sub>2</sub> refined with riding coordinates:

C6 (H6A, H6B), C11 (H11A, H11B), C10 (H10A, H10B), C7 (H7A, H7B), C2 (H2A, H2B), C9 (H9A, H9B), C5 (H5A, H5B), C8 (H8A, H8B), C4 (H4A, H4B), C18 (H18A, H18B), C3 (H3A, H3B), C1 (H1A, H1B)

2.b Aromatic/amide H refined with riding coordinates:

C13 (H13), C14 (H14), C15 (H15), C17 (H17), C16 (H16), C19 (H19)

2.c X=CH<sub>2</sub> refined with riding coordinates:

C20 (H20A, H20B)

This report has been created with Olex2, compiled on 2020.11.12 svn.r5f609507 for OlexSys. Please [let us know](#) if there are any errors or if you would like to have additional features.

## $[\text{Fe}(\text{L11})\text{Cl}_2] \cdot 2\text{MeCN}$

**Table S45 Crystal data and structure refinement for  $[\text{Fe}(\text{L11})\text{Cl}_2] \cdot 2\text{MeCN}$ .**

|                     |                                                         |
|---------------------|---------------------------------------------------------|
| Identification code | $[\text{Fe}(\text{L11})\text{Cl}_2] \cdot 2\text{MeCN}$ |
| Empirical formula   | $\text{C}_{22}\text{H}_{35}\text{Cl}_2\text{FeN}_5$     |
| Formula weight      | 496.30                                                  |
| Temperature/K       | 120.01                                                  |
| Crystal system      | orthorhombic                                            |
| Space group         | Pnma                                                    |
| a/ $\text{\AA}$     | 14.4316(7)                                              |
| b/ $\text{\AA}$     | 8.9132(5)                                               |
| c/ $\text{\AA}$     | 19.5405(10)                                             |
| $\alpha/^\circ$     | 90                                                      |
| $\beta/^\circ$      | 90                                                      |

|                                                |                                                               |
|------------------------------------------------|---------------------------------------------------------------|
| $\gamma/^\circ$                                | 90                                                            |
| Volume/ $\text{\AA}^3$                         | 2513.5(2)                                                     |
| Z                                              | 4                                                             |
| $\rho_{\text{calc}}/\text{g/cm}^3$             | 1.311                                                         |
| $\mu/\text{mm}^{-1}$                           | 0.831                                                         |
| F(000)                                         | 1048.0                                                        |
| Crystal size/ $\text{mm}^3$                    | $0.216 \times 0.169 \times 0.088$                             |
| Radiation                                      | MoK $\alpha$ ( $\lambda = 0.71073$ )                          |
| 2 $\theta$ range for data collection/ $^\circ$ | 3.508 to 56.726                                               |
| Index ranges                                   | $-19 \leq h \leq 19, -11 \leq k \leq 11, -26 \leq l \leq 26$  |
| Reflections collected                          | 46814                                                         |
| Independent reflections                        | 3344 [ $R_{\text{int}} = 0.0444, R_{\text{sigma}} = 0.0174$ ] |
| Data/restraints/parameters                     | 3344/235/201                                                  |
| Goodness-of-fit on $F^2$                       | 1.031                                                         |
| Final R indexes [ $ I  \geq 2\sigma(I)$ ]      | $R_1 = 0.0284, wR_2 = 0.0652$                                 |
| Final R indexes [all data]                     | $R_1 = 0.0372, wR_2 = 0.0693$                                 |
| Largest diff. peak/hole / $e \text{\AA}^{-3}$  | 0.30/-0.23                                                    |

**Table S46 Fractional Atomic Coordinates ( $\times 10^4$ ) and Equivalent Isotropic Displacement Parameters ( $\text{\AA}^2 \times 10^3$ ) for  $[\text{Fe}(\text{L11})\text{Cl}_2] \cdot 2\text{MeCN}$ .  $U_{\text{eq}}$  is defined as 1/3 of the trace of the orthogonalised  $U_{ij}$  tensor.**

| Atom | x           | y           | z           | U(eq)     |
|------|-------------|-------------|-------------|-----------|
| Fe1  | 4188.6 (2)  | 2500        | 2918.3 (2)  | 21.00 (8) |
| Cl1  | 3138.8 (2)  | 4465.7 (4)  | 2608.2 (2)  | 31.39 (9) |
| N1   | 4006.5 (10) | 2500        | 4072.4 (7)  | 20.4 (3)  |
| N2   | 5249.3 (19) | 4253 (3)    | 3243.7 (13) | 20.3 (7)  |
| N3   | 5138.3 (15) | 2717 (9)    | 2002.5 (10) | 28.8 (14) |
| N4   | 5342.8 (19) | 1137 (3)    | 3262.4 (14) | 20.7 (7)  |
| C1   | 4454.9 (11) | 3882.0 (19) | 4340.3 (7)  | 35.3 (4)  |
| C2   | 4828.3 (11) | 4922.1 (18) | 3789.3 (8)  | 32.3 (3)  |
| C3   | 5347 (3)    | 5192 (5)    | 2632 (2)    | 32.1 (9)  |
| C4   | 5524 (2)    | 4273 (4)    | 1978.2 (15) | 34.3 (7)  |
| C5   | 5871 (2)    | 1570 (4)    | 2095.1 (15) | 33.2 (7)  |
| C6   | 5597 (3)    | 375 (5)     | 2617 (2)    | 32.3 (9)  |
| C7   | 6152 (4)    | 3568 (7)    | 3437 (3)    | 31.3 (11) |
| C8   | 6132 (4)    | 1898 (7)    | 3591 (3)    | 31.0 (11) |
| C9   | 2984.7 (13) | 2500        | 4185.6 (9)  | 26.8 (4)  |
| C10  | 2642.3 (12) | 2500        | 4915.7 (9)  | 20.1 (4)  |
| C11  | 2463.9 (11) | 3822.4 (18) | 5261.6 (8)  | 38.0 (4)  |
| C12  | 2138.3 (12) | 3819 (2)    | 5930.4 (9)  | 46.0 (4)  |
| C13  | 1984.8 (16) | 2500        | 6264.0 (11) | 39.7 (5)  |
| C14  | 4567.2 (18) | 2722 (9)    | 1385.8 (11) | 26.7 (16) |
| C15  | 5067 (2)    | 2590 (40)   | 711.1 (13)  | 42 (2)    |
| C16  | 4910 (4)    | 1654 (7)    | 230 (2)     | 97 (2)    |



**Table S46 Fractional Atomic Coordinates ( $\times 10^4$ ) and Equivalent Isotropic Displacement Parameters ( $\text{\AA}^2 \times 10^3$ ) for  $[\text{Fe}(\text{L11})\text{Cl}_2] \cdot 2\text{MeCN}$ .  $U_{\text{eq}}$  is defined as 1/3 of the trace of the orthogonalised  $U_{ij}$  tensor.**

| Atom | x           | y    | z           | U(eq)    |
|------|-------------|------|-------------|----------|
| N5   | 3303.8 (16) | 7500 | 4620.4 (11) | 44.5 (5) |
| C17  | 2785.2 (17) | 7500 | 4183.5 (13) | 35.7 (5) |
| C18  | 2128 (2)    | 7500 | 3615.8 (15) | 49.8 (6) |

**Table S47 Anisotropic Displacement Parameters ( $\text{\AA}^2 \times 10^3$ ) for  $[\text{Fe}(\text{L11})\text{Cl}_2] \cdot 2\text{MeCN}$ . The Anisotropic displacement factor exponent takes the form:  $-2\pi^2[h^2a^{*2}U_{11}+2hka^*b^*U_{12}+\dots]$ .**

| Atom | U <sub>11</sub> | U <sub>22</sub> | U <sub>33</sub> | U <sub>23</sub> | U <sub>13</sub> | U <sub>12</sub> |
|------|-----------------|-----------------|-----------------|-----------------|-----------------|-----------------|
| Fe1  | 17.71 (13)      | 34.11 (15)      | 11.19 (12)      | 0               | -0.95 (9)       | 0               |
| Cl1  | 29.77 (17)      | 38.17 (19)      | 26.23 (17)      | 9.55 (14)       | -2.46 (13)      | 3.06 (14)       |
| N1   | 20.5 (7)        | 27.3 (8)        | 13.5 (7)        | 0               | -0.3 (6)        | 0               |
| N3   | 23.0 (9)        | 48 (4)          | 15.5 (8)        | -0.1 (12)       | -0.2 (7)        | 0.1 (13)        |
| C1   | 41.4 (8)        | 45.9 (9)        | 18.7 (6)        | -9.9 (6)        | 6.5 (6)         | -18.5 (7)       |
| C2   | 36.5 (8)        | 33.4 (8)        | 26.9 (7)        | -4.5 (6)        | -3.5 (6)        | -8.6 (7)        |
| C3   | 35 (2)          | 38 (2)          | 22.9 (16)       | 8.3 (17)        | 2.1 (15)        | -10.6 (17)      |
| C4   | 32.5 (16)       | 49.0 (19)       | 21.6 (14)       | 7.5 (13)        | 3.3 (12)        | -7.8 (15)       |
| C5   | 28.4 (15)       | 51 (2)          | 19.9 (13)       | -3.1 (14)       | 6.3 (12)        | 5.3 (14)        |
| C6   | 28 (2)          | 41 (2)          | 28.1 (17)       | -8.1 (18)       | 3.5 (15)        | 8.1 (16)        |
| C7   | 22.1 (16)       | 50 (3)          | 22 (2)          | -2.1 (18)       | -3.2 (16)       | -6 (2)          |
| C8   | 19.3 (15)       | 51 (3)          | 23 (2)          | -1.6 (16)       | -4.1 (16)       | 2.8 (19)        |
| C9   | 20.8 (9)        | 46.5 (12)       | 13.0 (8)        | 0               | -0.6 (7)        | 0               |
| C10  | 19.1 (8)        | 26.5 (9)        | 14.7 (8)        | 0               | 0.4 (6)         | 0               |
| C11  | 46.6 (9)        | 25.5 (7)        | 42.0 (9)        | -0.8 (6)        | 23.3 (7)        | -1.3 (7)        |
| C12  | 49.5 (10)       | 45.8 (10)       | 42.5 (9)        | -23.3 (8)       | 22.2 (8)        | -12.8 (8)       |
| C13  | 32.8 (11)       | 67.8 (16)       | 18.7 (9)        | 0               | 5.5 (9)         | 0               |
| C14  | 28.2 (11)       | 36 (5)          | 15.9 (9)        | 1.6 (12)        | 0.0 (8)         | 0.5 (14)        |
| C15  | 36.0 (12)       | 73 (7)          | 17.3 (10)       | -3 (4)          | 2.1 (9)         | -2 (5)          |
| C16  | 114 (4)         | 142 (5)         | 34 (2)          | -30 (3)         | 31 (2)          | -53 (4)         |
| N5   | 55.6 (13)       | 36.7 (11)       | 41.1 (11)       | 0               | -4.8 (10)       | 0               |
| C17  | 43.2 (13)       | 21.8 (10)       | 42.0 (13)       | 0               | 4.6 (11)        | 0               |
| C18  | 52.6 (15)       | 44.5 (14)       | 52.5 (16)       | 0               | -10.3 (13)      | 0               |

**Table S48 Bond Lengths for  $[\text{Fe}(\text{L11})\text{Cl}_2] \cdot 2\text{MeCN}$ .**

| Atom Atom            | Length/ $\text{\AA}$ | Atom Atom | Length/ $\text{\AA}$ |
|----------------------|----------------------|-----------|----------------------|
| Fe1 Cl1              | 2.3942 (4)           | N4 C6     | 1.479 (5)            |
| Fe1 Cl1 <sup>1</sup> | 2.3942 (4)           | N4 C8     | 1.473 (6)            |
| Fe1 N1               | 2.2705 (15)          | C1 C2     | 1.520 (2)            |
| Fe1 N2               | 2.278 (3)            | C3 C4     | 1.538 (5)            |
| Fe1 N3               | 2.262 (2)            | C5 C6     | 1.527 (5)            |
| Fe1 N4               | 2.169 (3)            | C7 C8     | 1.519 (6)            |
| Fe1 N4 <sup>1</sup>  | 2.169 (3)            | C9 C10    | 1.510 (2)            |
| N1 C1                | 1.4867 (17)          | C10 C11   | 1.3829 (18)          |

**Table S48 Bond Lengths for [Fe(L11)Cl<sub>2</sub>].2MeCN.**

| Atom | Atom            | Length/Å    | Atom | Atom             | Length/Å    |
|------|-----------------|-------------|------|------------------|-------------|
| N1   | C1 <sup>1</sup> | 1.4866 (17) | C10  | C11 <sup>1</sup> | 1.3830 (18) |
| N1   | C9              | 1.491 (2)   | C11  | C12              | 1.389 (2)   |
| N2   | C2              | 1.364 (3)   | C12  | C13              | 1.362 (2)   |
| N2   | C3              | 1.467 (5)   | C14  | C15              | 1.507 (4)   |
| N2   | C7              | 1.487 (7)   | C15  | C16              | 1.28 (2)    |
| N3   | C4              | 1.495 (8)   | N5   | C17              | 1.135 (3)   |
| N3   | C5              | 1.482 (7)   | C17  | C18              | 1.460 (4)   |
| N3   | C14             | 1.460 (3)   |      |                  |             |

<sup>1</sup>+X,1/2-Y,+Z**Table S49 Bond Angles for [Fe(L11)Cl<sub>2</sub>].2MeCN.**

| Atom            | Atom | Atom             | Angle/°     | Atom             | Atom | Atom             | Angle/°     |
|-----------------|------|------------------|-------------|------------------|------|------------------|-------------|
| Cl1             | Fe1  | Cl1 <sup>1</sup> | 94.08 (2)   | C3               | N2   | C7               | 110.9 (3)   |
| N1              | Fe1  | Cl1              | 100.26 (3)  | C7               | N2   | Fe1              | 112.2 (3)   |
| N1              | Fe1  | Cl1 <sup>1</sup> | 100.26 (3)  | C4               | N3   | Fe1              | 109.3 (3)   |
| N1              | Fe1  | N2               | 78.49 (7)   | C5               | N3   | Fe1              | 106.1 (3)   |
| N2              | Fe1  | Cl1 <sup>1</sup> | 176.23 (8)  | C5               | N3   | C4               | 112.2 (3)   |
| N2              | Fe1  | Cl1              | 89.65 (8)   | C14              | N3   | Fe1              | 108.13 (15) |
| N3              | Fe1  | Cl1              | 96.93 (16)  | C14              | N3   | C4               | 100.4 (5)   |
| N3              | Fe1  | Cl1 <sup>1</sup> | 104.22 (16) | C14              | N3   | C5               | 120.4 (5)   |
| N3              | Fe1  | N1               | 148.85 (7)  | C6               | N4   | Fe1              | 100.6 (2)   |
| N3              | Fe1  | N2               | 75.82 (16)  | C8               | N4   | Fe1              | 118.1 (3)   |
| N4 <sup>1</sup> | Fe1  | Cl1 <sup>1</sup> | 167.03 (8)  | C8               | N4   | C6               | 113.1 (3)   |
| N4              | Fe1  | Cl1              | 167.03 (8)  | N1               | C1   | C2               | 114.22 (12) |
| N4 <sup>1</sup> | Fe1  | Cl1              | 98.89 (8)   | N2               | C2   | N4 <sup>1</sup>  | 11.91 (16)  |
| N4              | Fe1  | Cl1 <sup>1</sup> | 98.89 (8)   | N2               | C2   | C1               | 116.41 (18) |
| N4 <sup>1</sup> | Fe1  | N1               | 77.34 (8)   | C1               | C2   | N4 <sup>1</sup>  | 105.29 (15) |
| N4              | Fe1  | N1               | 77.34 (8)   | N2               | C3   | C4               | 112.9 (3)   |
| N4              | Fe1  | N2               | 77.38 (12)  | N3               | C4   | C3               | 114.0 (3)   |
| N4 <sup>1</sup> | Fe1  | N2               | 9.24 (10)   | N3               | C5   | C6               | 112.2 (3)   |
| N4 <sup>1</sup> | Fe1  | N3               | 74.46 (14)  | N4               | C6   | C5               | 108.3 (3)   |
| N4              | Fe1  | N3               | 80.08 (15)  | N2               | C7   | C8               | 115.8 (6)   |
| N4 <sup>1</sup> | Fe1  | N4               | 68.15 (16)  | N4               | C8   | C7               | 112.4 (6)   |
| C1 <sup>1</sup> | N1   | Fe1              | 107.42 (8)  | N1               | C9   | C10              | 117.64 (15) |
| C1              | N1   | Fe1              | 107.42 (8)  | C11              | C10  | C9               | 121.52 (9)  |
| C1 <sup>1</sup> | N1   | C1               | 111.91 (17) | C11 <sup>1</sup> | C10  | C9               | 121.52 (9)  |
| C1              | N1   | C9               | 112.22 (10) | C11              | C10  | C11 <sup>1</sup> | 116.93 (18) |
| C1 <sup>1</sup> | N1   | C9               | 112.22 (10) | C10              | C11  | C12              | 121.41 (15) |
| C9              | N1   | Fe1              | 105.18 (10) | C13              | C12  | C11              | 120.47 (16) |
| C2              | N2   | Fe1              | 102.64 (16) | C12              | C13  | C12 <sup>1</sup> | 119.3 (2)   |
| C2              | N2   | C3               | 115.5 (3)   | N3               | C14  | C15              | 116.9 (2)   |
| C2              | N2   | C7               | 111.7 (3)   | C16              | C15  | C14              | 127.6 (18)  |
| C3              | N2   | Fe1              | 103.2 (2)   | N5               | C17  | C18              | 179.3 (3)   |

**Table S50 Torsion Angles for [Fe(L11)Cl<sub>2</sub>].2MeCN.**

| A               | B   | C               | D                | Angle/°     | A                | B   | C   | D                | Angle/°     |
|-----------------|-----|-----------------|------------------|-------------|------------------|-----|-----|------------------|-------------|
| Fe1 N1          | C1  | C2              |                  | 4.26 (16)   | C2               | N2  | C3  | C4               | -161.4 (3)  |
| Fe1 N1          | C9  | C10             |                  | 180.000 (0) | C2               | N2  | C7  | C8               | 97.2 (6)    |
| Fe1 N2          | C2  | N4 <sup>1</sup> |                  | 72.3 (9)    | C3               | N2  | C2  | N4 <sup>1</sup>  | -176.2 (11) |
| Fe1 N2          | C2  | C1              |                  | 50.5 (2)    | C3               | N2  | C2  | C1               | 162.0 (3)   |
| Fe1 N2          | C3  | C4              |                  | -50.2 (3)   | C3               | N2  | C7  | C8               | -132.4 (5)  |
| Fe1 N2          | C7  | C8              |                  | -17.5 (6)   | C4               | N3  | C5  | C6               | 136.5 (3)   |
| Fe1 N3          | C4  | C3              |                  | 11.5 (4)    | C4               | N3  | C14 | C15              | 75.8 (17)   |
| Fe1 N3          | C5  | C6              |                  | 17.3 (4)    | C5               | N3  | C4  | C3               | -105.9 (3)  |
| Fe1 N3          | C14 | C15             |                  | -169.8 (16) | C5               | N3  | C14 | C15              | -47.8 (17)  |
| Fe1 N4          | C6  | C5              |                  | 60.7 (3)    | C6               | N4  | C8  | C7               | 98.7 (5)    |
| Fe1 N4          | C8  | C7              |                  | -18.3 (7)   | C7               | N2  | C2  | N4 <sup>1</sup>  | -48.2 (9)   |
| N1              | C1  | C2              | N2               | -39.9 (2)   | C7               | N2  | C2  | C1               | -70.0 (3)   |
| N1              | C1  | C2              | N4 <sup>1</sup>  | -44.49 (19) | C7               | N2  | C3  | C4               | 70.2 (5)    |
| N1              | C9  | C10             | C11              | 91.07 (16)  | C8               | N4  | C6  | C5               | -66.1 (5)   |
| N1              | C9  | C10             | C11 <sup>1</sup> | -91.07 (16) | C9               | N1  | C1  | C2               | -           |
|                 |     |                 |                  |             |                  |     |     |                  | 110.87 (16) |
| N2              | C3  | C4              | N3               | 27.2 (5)    | C9               | C10 | C11 | C12              | 179.22 (17) |
| N2              | C7  | C8              | N4               | 23.3 (8)    | C10              | C11 | C12 | C13              | -0.1 (3)    |
| N3              | C5  | C6              | N4               | -54.7 (4)   | C11 <sup>1</sup> | C10 | C11 | C12              | 1.3 (3)     |
| N3              | C14 | C15             | C16              | 127.4 (14)  | C11              | C12 | C13 | C12 <sup>1</sup> | -1.2 (4)    |
| C1 <sup>1</sup> | N1  | C1              | C2               | 121.94 (14) | C14              | N3  | C4  | C3               | 125.0 (3)   |
| C1 <sup>1</sup> | N1  | C9              | C10              | 63.51 (10)  | C14              | N3  | C5  | C6               | -105.7 (4)  |
| C1              | N1  | C9              | C10              | -63.51 (10) |                  |     |     |                  |             |

**Table S51 Hydrogen Atom Coordinates (Å×10<sup>4</sup>) and Isotropic Displacement Parameters (Å<sup>2</sup>×10<sup>3</sup>) for [Fe(L11)Cl<sub>2</sub>].2MeCN.**

| Atom | x         | y         | z        | U(eq)  |
|------|-----------|-----------|----------|--------|
| H1A  | 4971.75   | 3588.06   | 4645.25  | 42     |
| H1B  | 3998.05   | 4439.9    | 4619.82  | 42     |
| H2A  | 5254 (11) | 5646 (18) | 4001 (8) | 38 (5) |
| H2B  | 4328 (11) | 5450 (20) | 3570 (9) | 45 (5) |
| H3A  | 5868.01   | 5899.56   | 2700.34  | 39     |
| H3B  | 4775.57   | 5791.49   | 2570.43  | 39     |
| H4A  | 5248.05   | 4808.18   | 1584.09  | 41     |
| H4B  | 6201.08   | 4211.79   | 1899.75  | 41     |
| H5A  | 6448.4    | 2067.12   | 2248.3   | 40     |
| H5B  | 5998.23   | 1081.19   | 1649.81  | 40     |
| H6A  | 5065.03   | -214.81   | 2443.99  | 39     |
| H6B  | 6121.82   | -319.31   | 2696.84  | 39     |
| H7A  | 6390.18   | 4098.03   | 3846.37  | 38     |

**Table S51 Hydrogen Atom Coordinates ( $\text{\AA}\times 10^4$ ) and Isotropic Displacement Parameters ( $\text{\AA}^2\times 10^3$ ) for  $[\text{Fe}(\text{L11})\text{Cl}_2]\cdot 2\text{MeCN}$ .**

| Atom | x       | y       | z       | U(eq) |
|------|---------|---------|---------|-------|
| H7B  | 6597.06 | 3744.23 | 3060.46 | 38    |
| H8A  | 6715.89 | 1436.96 | 3429.07 | 37    |
| H8B  | 6094.4  | 1749.57 | 4092.24 | 37    |
| H9A  | 2724.57 | 1606.05 | 3954.34 | 32    |
| H9B  | 2724.57 | 3393.95 | 3954.34 | 32    |
| H11  | 2566.2  | 4752.99 | 5036.93 | 46    |
| H12  | 2021.9  | 4743.13 | 6156.98 | 55    |
| H13  | 1772.95 | 2500.01 | 6724.28 | 48    |
| H14A | 4203.73 | 3664.13 | 1380.57 | 32    |
| H14B | 4120.71 | 1882.19 | 1419.36 | 32    |
| H15  | 5554.82 | 3285.67 | 634.66  | 51    |
| H16A | 4430.59 | 931.88  | 277.68  | 116   |
| H16B | 5273.89 | 1679.81 | -174.86 | 116   |
| H18A | 2320.44 | 6757.83 | 3274.18 | 75    |
| H18B | 2112.6  | 8497.83 | 3405.47 | 75    |
| H18C | 1509.24 | 7244.34 | 3786.58 | 75    |

**Table S52 Atomic Occupancy for  $[\text{Fe}(\text{L11})\text{Cl}_2]\cdot 2\text{MeCN}$ .**

| Atom | Occupancy | Atom | Occupancy | Atom | Occupancy |
|------|-----------|------|-----------|------|-----------|
| N2   | 0.5       | N3   | 0.5       | N4   | 0.5       |
| C3   | 0.5       | H3A  | 0.5       | H3B  | 0.5       |
| C4   | 0.5       | H4A  | 0.5       | H4B  | 0.5       |
| C5   | 0.5       | H5A  | 0.5       | H5B  | 0.5       |
| C6   | 0.5       | H6A  | 0.5       | H6B  | 0.5       |
| C7   | 0.5       | H7A  | 0.5       | H7B  | 0.5       |
| C8   | 0.5       | H8A  | 0.5       | H8B  | 0.5       |
| H9A  | 0.5       | H9B  | 0.5       | C14  | 0.5       |
| H14A | 0.5       | H14B | 0.5       | C15  | 0.5       |
| H15  | 0.5       | C16  | 0.5       | H16A | 0.5       |
| H16B | 0.5       | H18A | 0.5       | H18B | 0.5       |
| H18C | 0.5       |      |           |      |           |

### Experimental

Single crystals of  $\text{C}_{22}\text{H}_{35}\text{Cl}_2\text{FeN}_5$   $[[\text{Fe}(\text{L11})\text{Cl}_2]\cdot 2\text{MeCN}]$  were  $[[\text{Fe}(\text{L11})\text{Cl}_2]\cdot 2\text{MeCN}]$ . A suitable crystal was selected and  $[[\text{Fe}(\text{L11})\text{Cl}_2]\cdot 2\text{MeCN}]$  on a **Bruker APEX-II** diffractometer. The crystal was kept at 120.01 K during data collection. Using Olex2 [1], the structure was solved with the SHELXT [2] structure solution program using Intrinsic Phasing and refined with the SHELXL [3] refinement package using Least Squares minimisation.

1. Dolomanov, O.V., Bourhis, L.J., Gildea, R.J., Howard, J.A.K. & Puschmann, H. (2009), J. Appl. Cryst. 42, 339-341.
2. Sheldrick, G.M. (2015). Acta Cryst. A71, 3-8.
3. Sheldrick, G.M. (2015). Acta Cryst. C71, 3-8.

### Crystal structure determination of $[[\text{Fe}(\text{L11})\text{Cl}_2]\cdot 2\text{MeCN}]$

**Crystal Data** for  $\text{C}_{22}\text{H}_{35}\text{Cl}_2\text{FeN}_5$  ( $M=496.30$  g/mol): orthorhombic, space group Pnma (no. 62),  $a = 14.4316(7)$  Å,  $b = 8.9132(5)$  Å,  $c = 19.5405(10)$  Å,  $V = 2513.5(2)$  Å<sup>3</sup>,  $Z = 4$ ,  $T = 120.01$  K,  $\mu(\text{MoK}\alpha) = 0.831$  mm<sup>-1</sup>,  $D_{\text{calc}} = 1.311$  g/cm<sup>3</sup>, 46814 reflections measured ( $3.508^\circ \leq 2\theta \leq 56.726^\circ$ ), 3344 unique ( $R_{\text{int}} = 0.0444$ ,  $R_{\text{sigma}} = 0.0174$ ) which were used in all calculations. The final  $R_1$  was 0.0284 ( $I > 2\sigma(I)$ ) and  $wR_2$  was 0.0693 (all data).

## Refinement model description

Number of restraints - 235, number of constraints - unknown.

### Details:

1. Fixed Uiso  
At 1.2 times of:  
All C(H) groups, All C(H,H) groups  
At 1.5 times of:  
All C(H,H,H) groups
2. Restrained distances  
C2-H2A = C2-H2B  
0.99 with sigma of 0.02  
N2-C2  $\approx$  N4\_\$1-C2  $\approx$  N4\_\$1-C6\_\$1  $\approx$  N2-C3  
with sigma of 0.02
3. Uiso/Uaniso restraints and constraints  
Fe1  $\approx$  C11  $\approx$  N1  $\approx$  N2  $\approx$  N3  $\approx$  N4  $\approx$  C1  $\approx$  C2  $\approx$  C3  
 $\approx$  C4  $\approx$  C5  $\approx$  C6  $\approx$  C7  $\approx$  C8  $\approx$  C9  $\approx$  C10  $\approx$  C11  $\approx$   
C12  $\approx$  C13  $\approx$  C14  $\approx$  C15  $\approx$  C16: within 2A with sigma of 0.04 and  
sigma for terminal atoms of 0.08 within 2A
4. Rigid body (RIGU) restrains  
Fe1, C11, N1, N2, N3, N4, C1, C2, C3, C4, C5, C6, C7, C8, C9, C10, C11, C12,  
C13, C14, C15, C16  
with sigma for 1-2 distances of 0.004 and sigma for 1-3 distances of 0.004
5. Others  
Fixed Sof: N2(0.5) N3(0.5) N4(0.5) C3(0.5) H3A(0.5) H3B(0.5) C4(0.5) H4A(0.5)  
H4B(0.5) C5(0.5) H5A(0.5) H5B(0.5) C6(0.5) H6A(0.5) H6B(0.5) C7(0.5) H7A(0.5)  
H7B(0.5) C8(0.5) H8A(0.5) H8B(0.5) H9A(0.5) H9B(0.5) C14(0.5) H14A(0.5)  
H14B(0.5) C15(0.5) H15(0.5) C16(0.5) H16A(0.5) H16B(0.5) H18A(0.5) H18B(0.5)  
H18C(0.5)
- 6.a Secondary CH2 refined with riding coordinates:  
C1(H1A,H1B), C3(H3A,H3B), C4(H4A,H4B), C5(H5A,H5B), C6(H6A,H6B), C7(H7A,H7B),  
C8(H8A,H8B), C9(H9A,H9B), C14(H14A,H14B)
- 6.b Aromatic/amide H refined with riding coordinates:  
C11(H11), C12(H12), C13(H13), C15(H15)
- 6.c X=CH2 refined with riding coordinates:  
C16(H16A,H16B)
- 6.d Idealised Me refined as rotating group:  
C18(H18A,H18B,H18C)

This report has been created with Olex2, compiled on 2020.11.12 svn.r5f609507 for OlexSys. Please [let us know](#) if there are any errors or if you would like to have additional features.
